# Supplementary material for: Determination of ligand field splitting in lanthanide(iii) monoporphyrinato complexes
Source: Royal Society of Chemistry journal article supplement (doi:10.1039/c9dt00915a), 2019-01-01
Supplement: c9dt00915a1.pdf [file c9dt00915a1.pdf]

## Electronic Supplementary Information

### Determination of Ligand Field Splitting in Lanthanide(III) Monoporphyrinato Complexes

Anas Santria,<sup>\*a</sup> Akira Fuyuhira,<sup>a</sup> Takamitsu Fukuda<sup>a</sup> and Naoto Ishikawa<sup>\*</sup>

<sup>a</sup> Department of Chemistry, Graduate School of Science, Osaka University, Toyonaka, Osaka 560-0043, Japan

Keywords : ligand field, energy splitting, electronic structure and monoporphyrinato

\*Email: [anass15@chem.sci.osaka-u.ac.jp](mailto:anass15@chem.sci.osaka-u.ac.jp) (A.S.)  
[iskw@chem.sci.osaka-u.ac.jp](mailto:iskw@chem.sci.osaka-u.ac.jp) (N.I.).

Contents:

**Figure S1.** <sup>1</sup>H NMR spectrum of [Y(TPP)(cyclen)]Cl in deuterated chloroform, CDCl<sub>3</sub>, measured at 298 K

**Figure S2.** The peak integration of porphyrin moiety of [Y(TPP)(cyclen)]Cl

**Figure S3.** The theoretical calculation for <sup>1</sup>H NMR spectrum of [Y(TPP)(cyclen)]Cl

**Figure S4.** <sup>1</sup>H NMR spectrum of [Ln(TPP)(cyclen)]Cl in deuterated chloroform, CDCl<sub>3</sub>, measured at 298

**Figure S5.** Magnetic susceptibility,  $\chi_m T$ , values against temperature for [Ln(TPP)(cyclen)]Cl

**Figure S6.** Plots of the principal magnetic susceptibilities for [Ln(TPP)(cyclen)]Cl (Produced by LF terms with  $C_4$  symmetry)

**Figure S7.** The molecular structure of terbium(III) monoporphyrinato cyclen complex: (a) obtained by single crystal x-ray diffraction, and (b) simplified by replacing phenyl rings to the hydrogen atoms

**Table S1.** Assignments of the <sup>1</sup>H NMR signal of the proton chemical shift  $\delta$ , paramagnetic shifts  $\Delta\delta$ , and components of geometrical factor for [Ln(TPP)(cyclen)]Cl (Ln = Tb, Dy, Ho, Er, Tm, and Yb)

**Table S2.** Magnetic susceptibility  $\chi T$  (cm<sup>3</sup> K mol<sup>-1</sup>) and calculated paramagnetic shift  $\Delta\delta$  (ppm) using equation 1.

**Table S3.** Electronic structures of [Ln(TPP)(cyclen)]Cl generated by LF parameters with  $C_4$  symmetry

**Table S4.** Electronic structures of [Ln(TPP)(cyclen)]Cl generated by LF parameters with  $D_{4d}$  symmetry

**Table S5.** The employed basis sets for theoretical calculations.

**Table S6.** Ab initio ligand-field parameters  $B_n^m$  (in cm<sup>-1</sup>) of the [Tb(TPP)(cyclen)]<sup>+</sup>

**Table S7.** CASSCF/RASSI calculated energies and wave functions of the [Tb(TPP)(cyclen)]<sup>+</sup>

**Table S8.** Composition of wave functions for [Tb(Por)(cyclen)]<sup>+</sup> as extracted from CASSCF/RASSI/Single\_Aniso calculations with basis set 1.

**Table S9.** Composition of wave functions for [Tb(Por)(cyclen)]<sup>+</sup> as extracted from CASSCF/RASSI/Single\_Aniso calculations with basis set 2.

**Table S10.** Composition of wave functions for [Tb(TPP)(cyclen)]<sup>+</sup> as extracted from CASSCF/RASSI/Single\_Aniso calculations with basis set 2.

**Table S11.** Ab initio ligand-field parameters  $B_n^m$  (in cm<sup>-1</sup>) of the [Dy(TPP)(cyclen)]<sup>+</sup>

**Table S12.** CASSCF/RASSI calculated energies and wave functions of the [Dy(Por)(cyclen)]<sup>+</sup> with an absolute coefficient larger than 0.05.

**Table S13.** Composition of wave functions for [Dy(Por)(cyclen)]<sup>+</sup> as extracted from CASSCF/RASSI/Single\_Aniso calculations with basis set 2.

**Table S14.** CASSCF/RASSI calculated energies and wave functions of the [Dy(TPP)(cyclen)]<sup>+</sup> with an absolute coefficient larger than 0.05.

**Table S15.** Composition of wave functions for [Dy(TPP)(cyclen)]<sup>+</sup> as extracted from CASSCF/RASSI/Single\_Aniso calculations with basis set 2.

**Table S16.** Ab initio ligand-field parameters  $B_n^m$  (in  $\text{cm}^{-1}$ ) of the  $[\text{Ho}(\text{TPP})(\text{cyclen})]^+$

**Table S17.** CASSCF/RASSI calculated energies and wave functions of the  $[\text{Ho}(\text{TPP})(\text{cyclen})]^+$  with an absolute coefficient larger than 0.05.

**Table S18.** Composition of wave functions for  $[\text{Ho}(\text{TPP})(\text{cyclen})]^+$  as extracted from CASSCF/RASSI/Single\_Aniso calculations with basis set 2.

**Table S19.** CASSCF/RASSI calculated energies and wave functions of the  $[\text{Ho}(\text{Por})(\text{cyclen})]^+$  with an absolute coefficient larger than 0.05.

**Table S20.** Composition of wave functions for  $[\text{Ho}(\text{Por})(\text{cyclen})]^+$  as extracted from CASSCF/RASSI/Single\_Aniso calculations with basis set 2.

**Table S21.** Ab initio ligand-field parameters  $B_n^m$  (in  $\text{cm}^{-1}$ ) of the  $[\text{Er}(\text{TPP})(\text{cyclen})]^+$

**Table S22.** CASSCF/RASSI calculated energies and wave functions of the  $[\text{Er}(\text{TPP})(\text{cyclen})]^+$  with an absolute coefficient larger than 0.05.

**Table S23.** Composition of wavefunctions for  $[\text{Er}(\text{TPP})(\text{cyclen})]^+$  as extracted from CASSCF/RASSI/Single\_Aniso calculations with basis set 2.

**Table S24.** CASSCF/RASSI calculated energies and wave functions of the  $[\text{Er}(\text{Por})(\text{cyclen})]^+$  with an absolute coefficient larger than 0.05.

**Table S25.** Composition of wavefunctions for  $[\text{Er}(\text{Por})(\text{cyclen})]^+$  as extracted from CASSCF/RASSI/Single\_Aniso calculations with basis set 2.

**Table S26.** Ab initio ligand-field parameters  $B_n^m$  (in  $\text{cm}^{-1}$ ) of the  $[\text{Tm}(\text{TPP})(\text{cyclen})]^+$

**Table S27.** CASSCF/RASSI calculated energies and wave functions of the  $[\text{Tm}(\text{TPP})(\text{cyclen})]^+$  with an absolute coefficient larger than 0.05.

**Table S28.** Composition of wave functions for  $[\text{Tm}(\text{TPP})(\text{cyclen})]^+$  as extracted from CASSCF/RASSI/Single\_Aniso calculations with basis set 2.

**Table S29.** CASSCF/RASSI calculated energies and wave functions of the  $[\text{Tm}(\text{Por})(\text{cyclen})]^+$  with an absolute coefficient larger than 0.05.

**Table S30.** Composition of wave functions for  $[\text{Tm}(\text{Por})(\text{cyclen})]^+$  as extracted from CASSCF/RASSI/Single\_Aniso calculations with basis set 2.

**Table S31.** Ab initio ligand-field parameters  $B_n^m$  (in  $\text{cm}^{-1}$ ) of the  $[\text{Yb}(\text{TPP})(\text{cyclen})]^+$

**Table S32.** CASSCF/RASSI calculated energies and wave functions of the  $[\text{Yb}(\text{TPP})(\text{cyclen})]^+$  with an absolute coefficient larger than 0.05.

**Table S33.** Composition of wave functions for  $[\text{Yb}(\text{TPP})(\text{cyclen})]^+$  as extracted from CASSCF/RASSI/Single\_Aniso calculations with basis set 2.

**Table S34.** CASSCF/RASSI calculated energies and wave functions of the  $[\text{Yb}(\text{Por})(\text{cyclen})]^+$  with an absolute coefficient larger than 0.05.

**Table S35.** Composition of wave functions for  $[\text{Yb}(\text{Por})(\text{cyclen})]^+$  as extracted from CASSCF/RASSI/Single\_Aniso calculations with basis set 2.

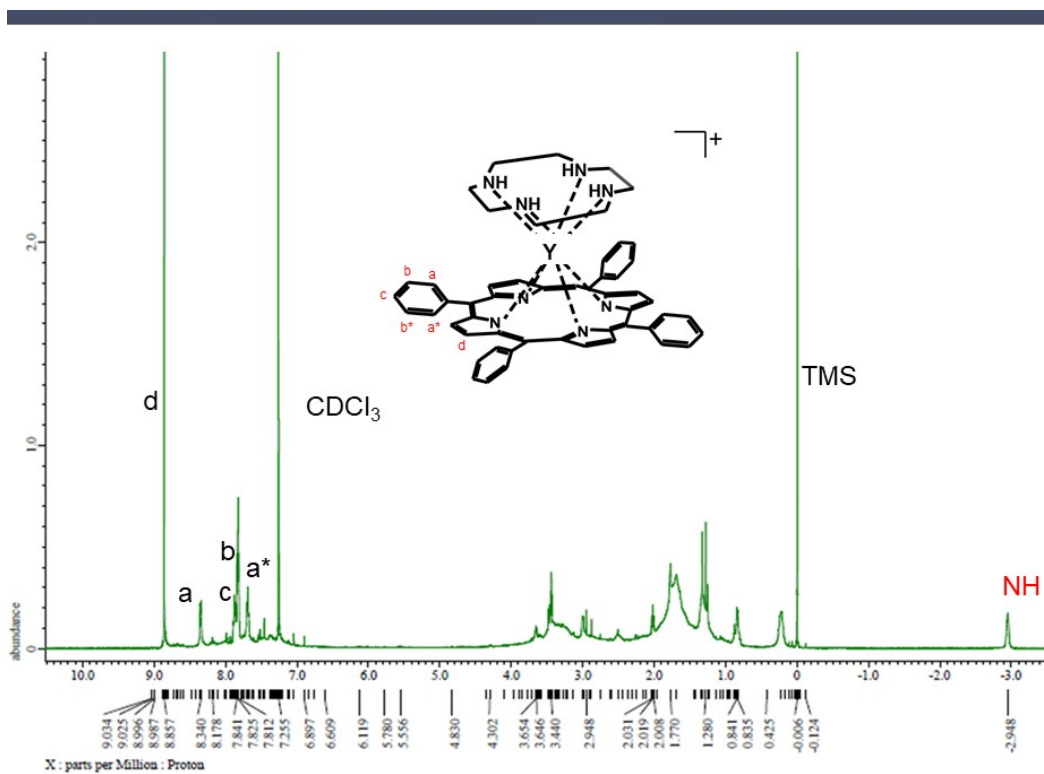

Figure S1.  $^1\text{H}$  NMR spectrum of  $[\text{Y}(\text{TPP})(\text{cyclen})]\text{Cl}$  in deuterated chloroform,  $\text{CDCl}_3$ , measured at 298 K

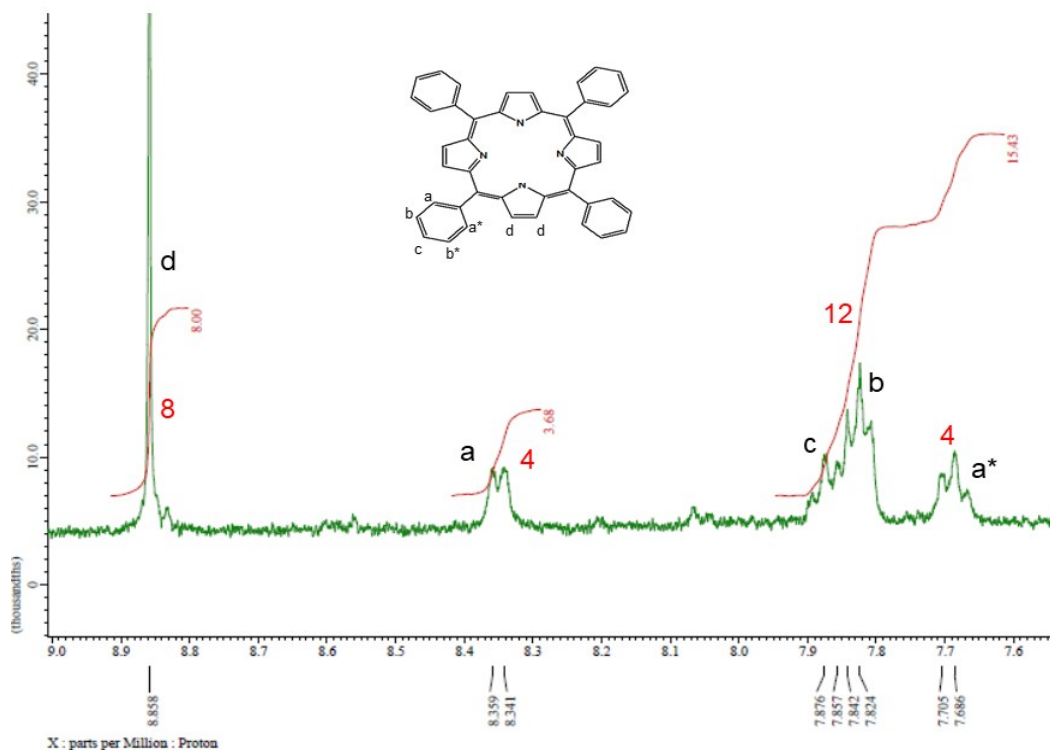

Figure S2. The peak integration for porphyrin moiety of  $[\text{Y}(\text{TPP})(\text{cyclen})]\text{Cl}$

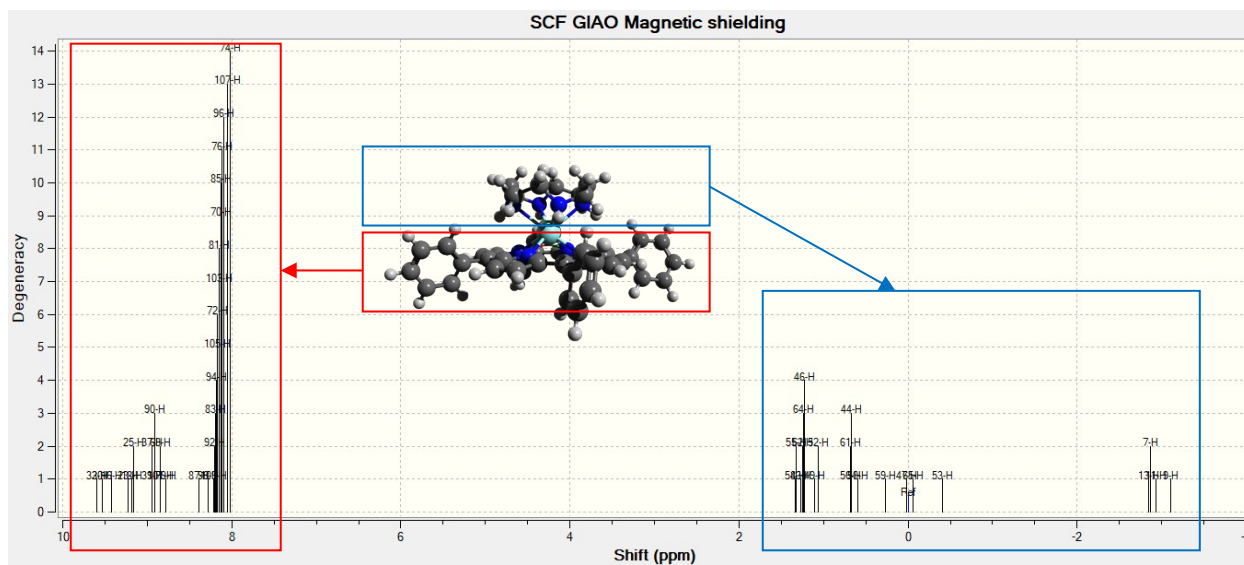

**Figure S3.** The theoretical calculation for  $^1\text{H}$  NMR spectrum of  $[\text{Y}(\text{TPP})(\text{cyclen})]\text{Cl}$ . Ref shielding: 31.8821 ppm (TMS B3LYP/6-311+G(2d,p))

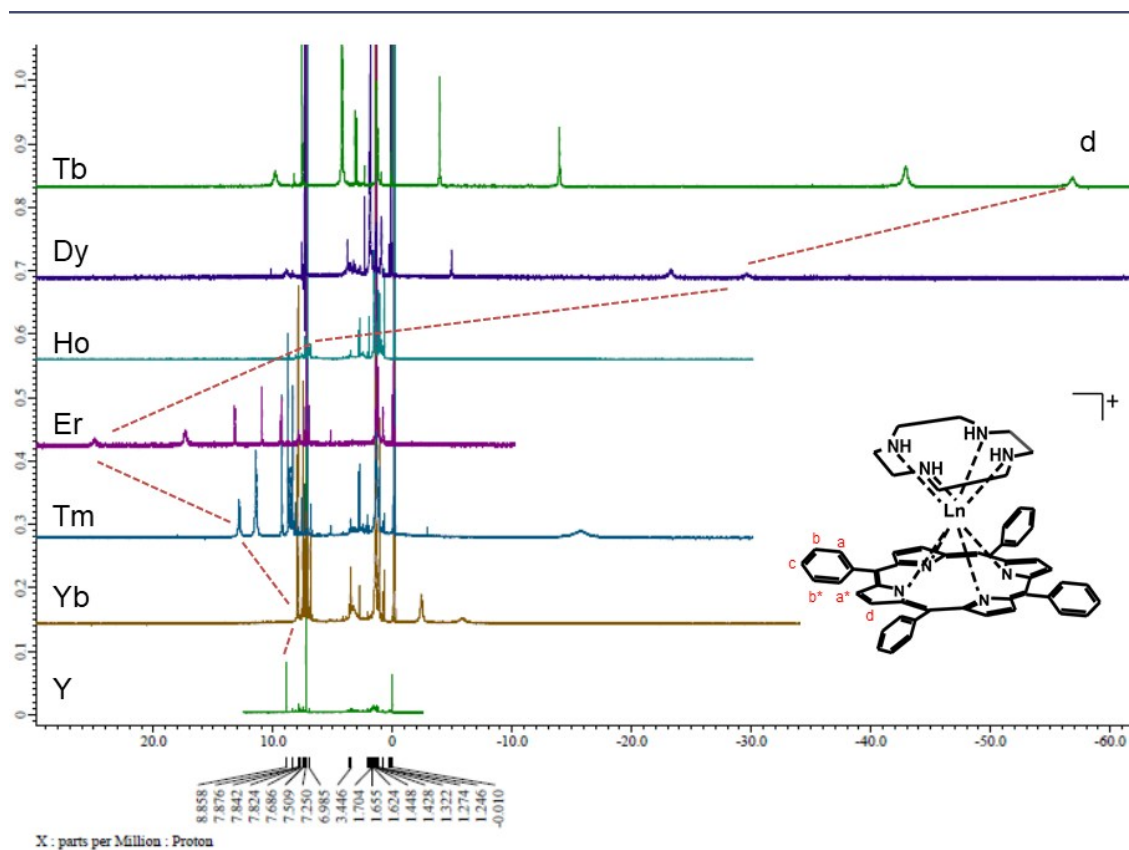

**Figure S4.**  $^1\text{H}$  NMR spectrum of  $[\text{Ln}(\text{TPP})(\text{cyclen})]\text{Cl}$  in deuterated chloroform,  $\text{CDCl}_3$ , measured at 298

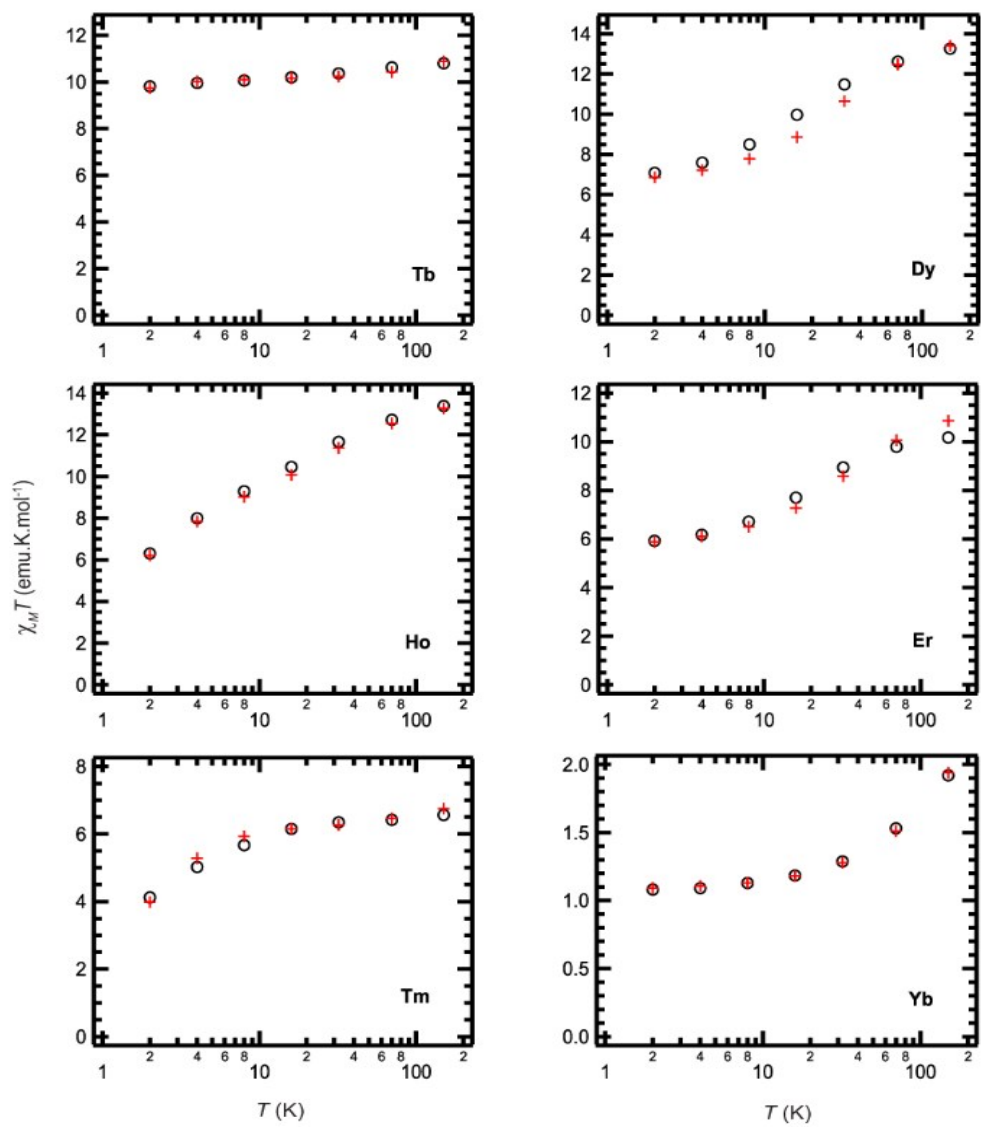

**Figure S5.** Magnetic susceptibility,  $\chi_m T$ , values against temperature for  $[\text{Ln}(\text{TPP})(\text{cyclen})]\text{Cl}$  ( $\text{Ln} = \text{Tb}, \text{Dy}, \text{Ho}, \text{Er}, \text{Tm},$  and  $\text{Yb}$ ). Red cross and black circles indicate theoretical and experimental for fitting, respectively.

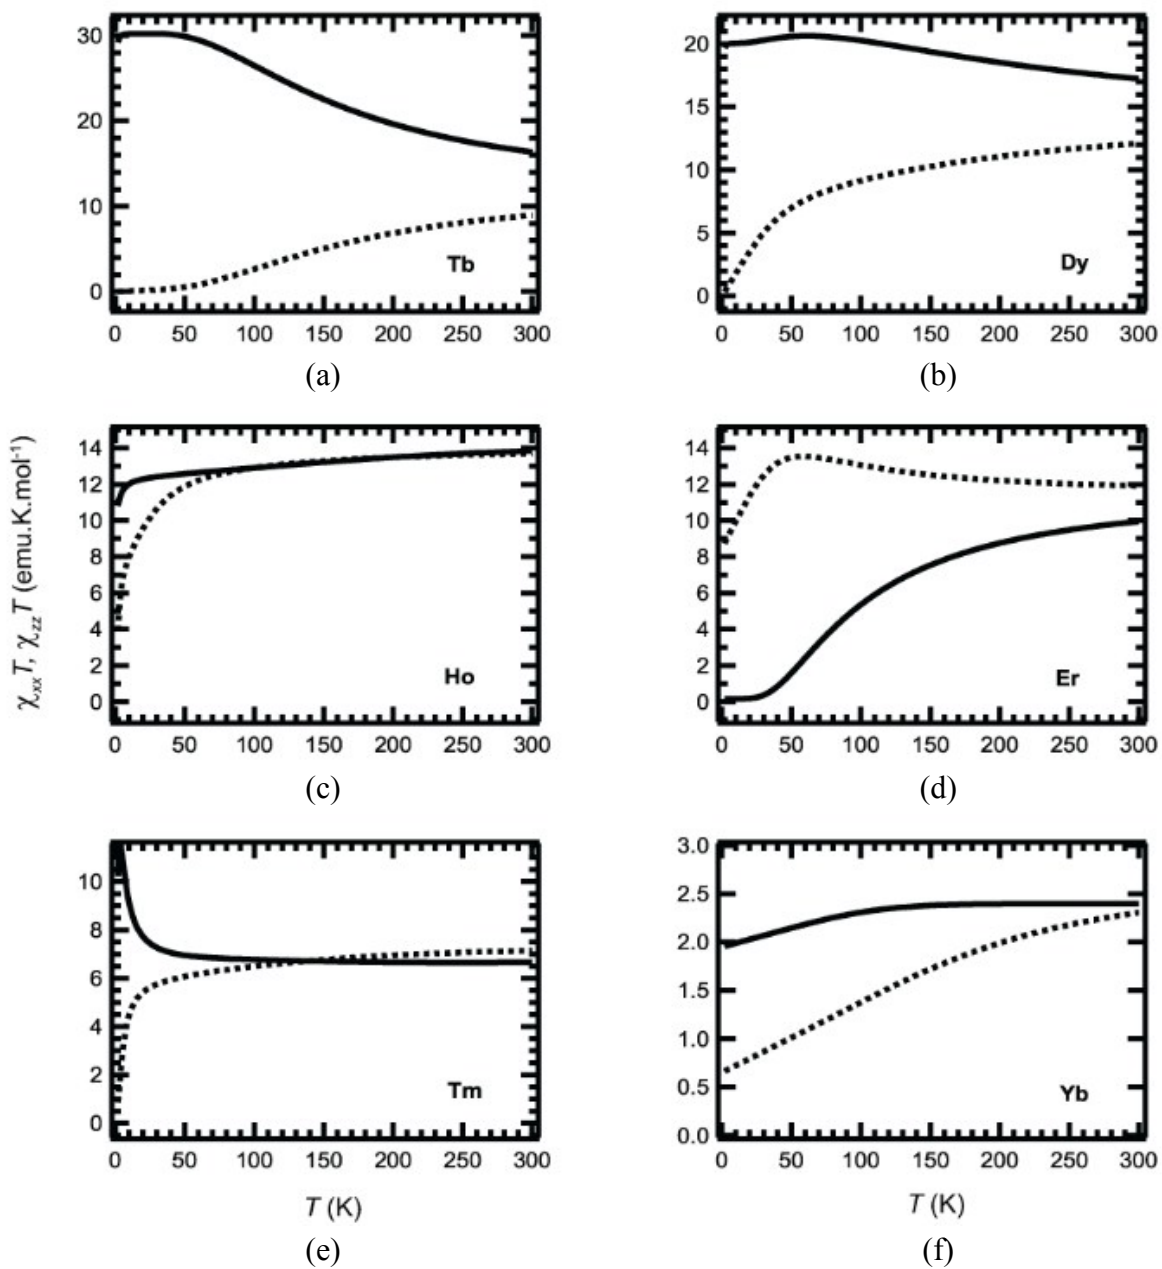

**Figure S6.** Plots of the principal magnetic susceptibilities  $\chi_{zz}T$  (solid lines) and  $\chi_{xx}T = \chi_{yy}T$  (dash lines) vs temperature ( $T$ ) for  $[\text{Ln}(\text{TPP})(\text{cyclen})]\text{Cl}$  (Produced by LF terms with  $C_4$  symmetry).

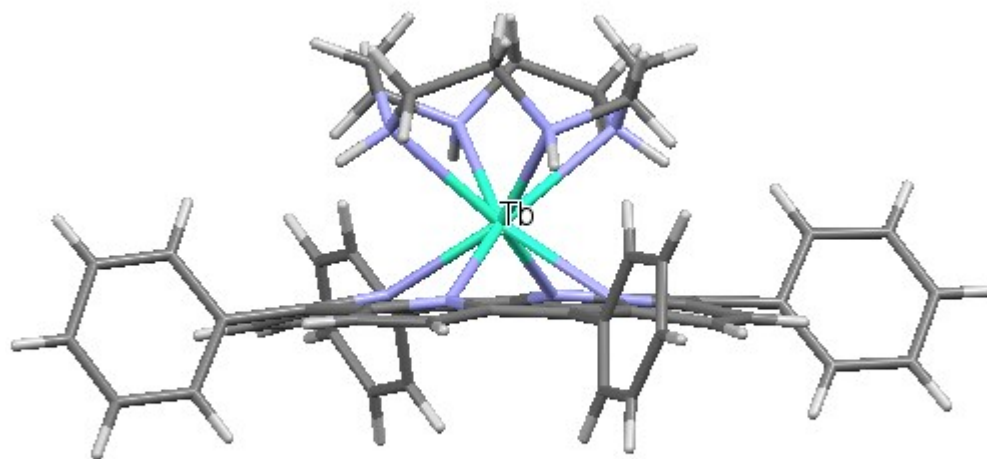

(a)

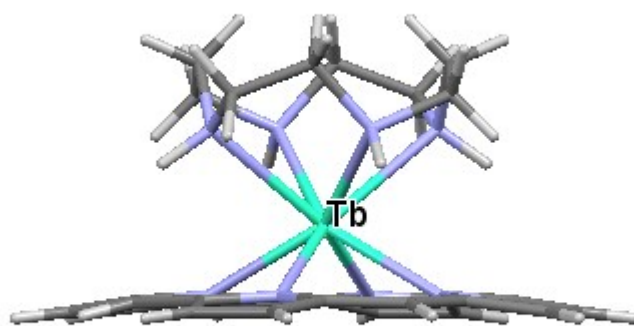

(b)

**Figure S7.** The molecular structure of terbium(III) monoporphyrinato cyclen complex: (a) obtained by single crystal x-ray diffraction, and (b) simplified by replacing phenyl rings to the hydrogen atoms.

**Table S1.** Assignments of the  $^1\text{H}$  NMR signal of the proton chemical shift  $\delta$ , paramagnetic shifts  $\Delta\delta$ , and components of geometrical factor ( $R = \text{Ln-H}$  distance;  $\theta =$  the angle of proton to the  $z$ -axis) for  $[\text{Ln}(\text{TPP})(\text{cyclen})]\text{Cl}$  ( $\text{Ln} = \text{Tb}, \text{Dy}, \text{Ho}, \text{Er}, \text{Tm}, \text{and Yb}$ )

|                 |                  | Y                      | Tb                     | Dy                     | Ho                     | Er                     | Tm                     | Yb                     |
|-----------------|------------------|------------------------|------------------------|------------------------|------------------------|------------------------|------------------------|------------------------|
| H <sup>a</sup>  | $\delta$         | 8.36                   | -43.21                 | -23.38                 | 7.45                   | 17.40                  | 11.50                  | 7.96                   |
|                 | $\Delta\delta$   | 0.00                   | -51.57                 | -31.74                 | -0.91                  | 9.04                   | 3.14                   | -0.40                  |
|                 | R                | 5.34                   | 5.34                   | 5.37                   | 5.35                   | 5.35                   | 5.36                   | 5.37                   |
|                 | $^s\theta$       | <i>N.A.</i>            | 65.50                  | 66.30                  | 65.50                  | 62.20                  | 65.60                  | 62.50                  |
|                 | <i>C</i>         | <i>N.A.</i>            | $-1.59 \times 10^{-3}$ | $-1.66 \times 10^{-3}$ | $-1.58 \times 10^{-3}$ | $-1.14 \times 10^{-3}$ | $-1.58 \times 10^{-3}$ | $-1.16 \times 10^{-3}$ |
|                 | $\Delta\delta/C$ | <i>N.A.</i>            | $3.25 \times 10^4$     | $1.91 \times 10^4$     | $5.75 \times 10^2$     | $-7.96 \times 10^3$    | $-1.98 \times 10^3$    | $3.45 \times 10^2$     |
| H <sup>a*</sup> | $\delta$         | 7.69                   | 9.52                   | 8.76                   | 7.72                   | 7.95                   | 8.48                   | 7.54                   |
|                 | $\Delta\delta$   | 0.00                   | 1.83                   | 1.07                   | 0.03                   | 0.26                   | 0.79                   | -0.15                  |
|                 | R                | 6.16                   | 6.16                   | 6.17                   | 6.16                   | 6.16                   | 6.18                   | 6.15                   |
|                 | $^s\theta$       | <i>N.A.</i>            | 54.20                  | 54.21                  | 54.22                  | 55.04                  | 58.50                  | 59.00                  |
|                 | <i>C</i>         | <i>N.A.</i>            | $5.67 \times 10^{-5}$  | $5.54 \times 10^{-5}$  | $-5.47 \times 10^{-5}$ | $-3.21 \times 10^{-5}$ | $-3.84 \times 10^{-4}$ | $-4.40 \times 10^{-3}$ |
|                 | $\Delta\delta/C$ | <i>N.A.</i>            | $3.23 \times 10^4$     | $1.93 \times 10^4$     | $5.84 \times 10^2$     | $-8.06 \times 10^3$    | $-2.06 \times 10^3$    | $3.43 \times 10^2$     |
| H <sup>b</sup>  | $\delta$         | 7.82                   | -4.24                  | 0.78                   |                        | 11.00                  | 8.88                   | 7.65                   |
|                 | $\Delta\delta$   | 0.00                   | -12.06                 | -7.04                  |                        | 3.18                   | 1.06                   | -0.17                  |
|                 | R                | 7.66                   | 7.65                   | 7.66                   |                        | 7.65                   | 7.62                   | 7.66                   |
|                 | $^s\theta$       | <i>N.A.</i>            | 61.80                  | 61.70                  |                        | 62.45                  | 65.50                  | 64.80                  |
|                 | <i>C</i>         | <i>N.A.</i>            | $-3.68 \times 10^{-4}$ | $-3.63 \times 10^{-4}$ |                        | $-3.99 \times 10^{-4}$ | $-5.46 \times 10^{-4}$ | $-5.07 \times 10^{-4}$ |
|                 | $\Delta\delta/C$ | <i>N.A.</i>            | $3.27 \times 10^4$     | $1.94 \times 10^4$     |                        | $-7.97 \times 10^3$    | $-1.94 \times 10^3$    | $3.45 \times 10^2$     |
| H <sup>b*</sup> | $\delta$         | 7.82                   | 0.96                   | 3.66                   | 7.69                   | 9.39                   | 8.75                   |                        |
|                 | $\Delta\delta$   | 0.00                   | -6.86                  | -4.16                  | -0.13                  | 1.57                   | 0.93                   |                        |
|                 | R                | 8.23                   | 8.23                   | 8.22                   | 8.22                   | 8.22                   | 8.22                   |                        |
|                 | $^s\theta$       | <i>N.A.</i>            | 59.70                  | 59.80                  | 59.60                  | 59.30                  | 65.00                  |                        |
|                 | <i>C</i>         | <i>N.A.</i>            | $-2.12 \times 10^{-4}$ | $-2.17 \times 10^{-4}$ | $-2.09 \times 10^{-4}$ | $-1.96 \times 10^{-5}$ | $-4.19 \times 10^{-4}$ |                        |
|                 | $\Delta\delta/C$ | <i>N.A.</i>            | $3.24 \times 10^4$     | $1.92 \times 10^4$     | $5.99 \times 10^2$     | $-7.98 \times 10^3$    | $-2.22 \times 10^3$    |                        |
| H <sup>c</sup>  | $\delta$         | 7.88                   | -14.25                 | -5.09                  | 7.48                   | 13.26                  | 9.35                   | 7.62                   |
|                 | $\Delta\delta$   | 0.00                   | -22.13                 | -12.97                 | -0.40                  | 5.38                   | 1.47                   | -0.26                  |
|                 | R                | 8.76                   | 8.76                   | 8.78                   | 8.78                   | 8.77                   | 8.79                   | 8.77                   |
|                 | $\theta$         | 79.90                  | 79.71                  | 79.06                  | 79.87                  | 79.69                  | 79.49                  | 79.40                  |
|                 | <i>C</i>         | $-6.44 \times 10^{-4}$ | $-6.73 \times 10^{-4}$ | $-6.58 \times 10^{-4}$ | $-6.70 \times 10^{-4}$ | $-6.70 \times 10^{-4}$ | $-6.62 \times 10^{-4}$ | $-6.67 \times 10^{-4}$ |
|                 | $\Delta\delta/C$ | <i>N.A.</i>            | $3.29 \times 10^4$     | $1.97 \times 10^4$     | $5.97 \times 10^2$     | $-8.03 \times 10^3$    | $-2.20 \times 10^3$    | $3.86 \times 10^2$     |
| H <sup>d</sup>  | $\delta$         | 8.86                   | -57.14                 | -29.80                 | 7.69                   | 24.95                  | 12.84                  | 8.12                   |
|                 | $\Delta\delta$   | 0.00                   | -66.00                 | -38.66                 | -1.17                  | 16.09                  | 3.98                   | -0.74                  |
|                 | R                | 5.45                   | 5.44                   | 5.44                   | 5.45                   | 5.44                   | 5.44                   | 5.41                   |
|                 | $\theta$         | 71.47                  | 70.45                  | 70.27                  | 70.30                  | 70.01                  | 70.59                  | 71.00                  |
|                 | <i>C</i>         | $-2.20 \times 10^{-3}$ | $-2.06 \times 10^{-3}$ | $-2.04 \times 10^{-3}$ | $-2.04 \times 10^{-3}$ | $-2.02 \times 10^{-3}$ | $-2.08 \times 10^{-3}$ | $-2.16 \times 10^{-3}$ |
|                 | $\Delta\delta/C$ | <i>N.A.</i>            | $3.21 \times 10^4$     | $1.90 \times 10^4$     | $5.74 \times 10^2$     | $-7.97 \times 10^3$    | $-1.92 \times 10^3$    | $3.45 \times 10^2$     |



**Table S2.** Magnetic susceptibility  $\chi T$  ( $\text{cm}^3 \text{K mol}^{-1}$ ) and calculated paramagnetic shift  $\Delta\delta$  (ppm) using equation 1. Simulation 1 and 2 are produced by LF terms with the  $C_4$  and  $D_{4d}$  symmetry, respectively. Ab Initio 1 and 2 are produced by CASSCF calculation with experimental and symmetrized- $C_4$  geometry, respectively.  $\chi_{AV}T$  = Average of principal magnetic susceptibility

| Method       | [Tb(TPP)(cyclen)]Cl |              |                | Method       | [Dy(TPP)(cyclen)]Cl |              |                |
|--------------|---------------------|--------------|----------------|--------------|---------------------|--------------|----------------|
|              | $\chi_{ZZ}T$        | $\chi_{AV}T$ | $\Delta\delta$ |              | $\chi_{ZZ}T$        | $\chi_{AV}T$ | $\Delta\delta$ |
| Simulation 1 | 16.3620             | 11.4227      | -60.0201       | Simulation 1 | 17.235              | 13.8137      | -38.6129       |
| Simulation 2 | 16.3840             | 11.5460      | -58.7887       | Simulation 2 | 17.5640             | 13.9287      | -41.0281       |
| Ab Initio 1  | 15.0831             | 11.7809      | -40.1269       | Ab Initio 1  | 16.5731             | 14.0984      | -27.9293       |
| Ab Initio 2  | 14.9941             | 11.78457     | -35.4289       | Ab Initio 2  | 16.5349             | 14.0937      | -27.0594       |
| Method       | [Ho(TPP)(cyclen)]Cl |              |                | Method       | [Er(TPP)(cyclen)]Cl |              |                |
|              | $\chi_{ZZ}T$        | $\chi_{AV}T$ | $\Delta\delta$ |              | $\chi_{ZZ}T$        | $\chi_{AV}T$ | $\Delta\delta$ |
| Simulation 1 | 13.8390             | 13.7430      | -1.1736        | Simulation 1 | 9.9440              | 11.2553      | 15.9927        |
| Simulation 2 | 14.0010             | 13.9050      | -1.1736        | Simulation 2 | 10.1360             | 11.3553      | 14.8707        |
| Ab Initio 1  | 14.3258             | 14.0083      | -3.8820        | Ab Initio 1  | 10.6319             | 11.4081      | 9.4660         |
| Ab Initio 2  | 14.1498             | 13.9905      | -2.0564        | Ab Initio 2  | 10.3527             | 11.4103      | 11.7227        |
| Method       | [Tm(TPP)(cyclen)]Cl |              |                | Method       | [Yb(TPP)(cyclen)]Cl |              |                |
|              | $\chi_{ZZ}T$        | $\chi_{AV}T$ | $\Delta\delta$ |              | $\chi_{ZZ}T$        | $\chi_{AV}T$ | $\Delta\delta$ |
| Simulation 1 | 6.6640              | 6.9820       | 3.8956         | Simulation 1 | 2.3950              | 2.3343       | -0.7376        |
| Simulation 2 | 6.7150              | 7.0443       | 4.0344         | Simulation 2 | 2.4870              | 2.4257       | -0.7457        |
| Ab Initio 1  | 6.6486              | 7.0938       | 5.4534         | Ab Initio 1  | 2.4334              | 2.5093       | 0.9232         |
| Ab Initio 2  | 7.0090              | 7.1007       | 1.1601         | Ab Initio 2  | 2.6136              | 2.5309       | -0.9919        |

**Table S3.** Electronic structures of [Ln(TPP)(cyclen)]Cl generated by LF parameters with  $C_4$  symmetry (Energies and wave functions).

| [Tb(TPP)(cyclen)]Cl         |                 |                 |                |                 |                |                |                 |
|-----------------------------|-----------------|-----------------|----------------|-----------------|----------------|----------------|-----------------|
| Energy ( $\text{cm}^{-1}$ ) | Wave Function   |                 |                |                 |                |                |                 |
| 0.00                        | + 0.71  + 6)    | + 0.71  - 6)    | - 0.05  + 2)   | - 0.05  - 2)    |                |                |                 |
| 0.39                        | + 0.71  + 6)    | - 0.71  - 6)    | - 0.03  + 2)   | + 0.03  - 2)    |                |                |                 |
| 150.73                      | + 0.99 0)       | + 0.09  + 4)    | + 0.09  - 4)   |                 |                |                |                 |
| 184.07                      | - 0.69  + 1)    | - 0.69  - 1)    | - 0.16  + 3)   | - 0.16  - 3)    |                |                |                 |
| 184.07                      | + 0.69  + 1)    | - 0.69  - 1)    | - 0.16  + 3)   | + 0.16  - 3)    |                |                |                 |
| 238.74                      | + 0.71  + 2)    | + 0.71  - 2)    | + 0.05  + 6)   | + 0.05  - 6)    |                |                |                 |
| 399.80                      | - 0.71  + 2)    | + 0.71  - 2)    | - 0.03  + 6)   | + 0.03  - 6)    |                |                |                 |
| 490.84                      | - 0.69  + 3)    | + 0.69  - 3)    | - 0.16  + 1)   | + 0.16  - 1)    | - 0.03  + 5)   | + 0.03  - 5)   |                 |
| 490.84                      | - 0.69  + 3)    | - 0.69  - 3)    | + 0.16  + 1)   | - 0.16  - 1)    | + 0.03  + 5)   | + 0.03  - 5)   |                 |
| 515.74                      | + 0.71  + 5)    | + 0.71  - 5)    | + 0.03  + 3)   | + 0.03  - 3)    |                |                |                 |
| 515.74                      | - 0.71  + 5)    | + 0.71  - 5)    | + 0.03  + 3)   | - 0.03  - 3)    |                |                |                 |
| 589.38                      | - 0.71  + 4)    | + 0.71  - 4)    |                |                 |                |                |                 |
| 596.29                      | - 0.70  + 4)    | - 0.70  - 4)    | + 0.12 0)      |                 |                |                |                 |
| [Dy(TPP)(cyclen)]Cl         |                 |                 |                |                 |                |                |                 |
| Energy ( $\text{cm}^{-1}$ ) | Wave Function   |                 |                |                 |                |                |                 |
| 0.00                        | + 0.99  + 11/2) | + 0.15  - 11/2) | + 0.05  + 3/2) |                 |                |                |                 |
| 0.00                        | - 0.99  - 11/2) | + 0.15  + 11/2) | - 0.05  - 3/2) |                 |                |                |                 |
| 67.18                       | + 0.98  + 13/2) | + 0.21  + 5/2)  | - 0.07  - 3/2) | + 0.04  - 13/2) |                |                |                 |
| 67.18                       | + 0.98  - 13/2) | + 0.21  - 5/2)  | - 0.07  + 3/2) | - 0.04  + 13/2) |                |                |                 |
| 106.59                      | + 0.79  - 9/2)  | + 0.59  + 9/2)  | - 0.09  - 1/2) | - 0.07  + 1/2)  | + 0.05  - 7/2) |                |                 |
| 106.59                      | + 0.79  + 9/2)  | - 0.59  - 9/2)  | - 0.09  + 1/2) | + 0.07  - 1/2)  | - 0.05  + 7/2) |                |                 |
| 222.22                      | - 0.91  + 7/2)  | + 0.29  - 1/2)  | + 0.23  - 7/2) | - 0.14  + 15/2) | + 0.10  - 9/2) | - 0.07  + 1/2) | + 0.04  - 15/2) |

|                            |                 |                 |                 |                 |                |                 |                 |
|----------------------------|-----------------|-----------------|-----------------|-----------------|----------------|-----------------|-----------------|
| 222.22                     | - 0.91  - 7/2)  | + 0.29  + 1/2)  | - 0.23  + 7/2)  | - 0.14  - 15/2) | + 0.10  + 9/2) | + 0.07  - 1/2)  | - 0.04  + 15/2) |
| 304.19                     | + 0.73  + 5/2)  | - 0.57  - 3/2)  | + 0.25  - 5/2)  | - 0.20  + 13/2) | - 0.19  + 3/2) | - 0.07  - 13/2) | + 0.04  - 11/2) |
| 304.19                     | - 0.73  - 5/2)  | + 0.57  + 3/2)  | + 0.25  + 5/2)  | + 0.20  - 13/2) | - 0.19  - 3/2) | - 0.07  + 13/2) | - 0.04  + 11/2) |
| 541.19                     | - 0.80  - 1/2)  | + 0.49  + 1/2)  | - 0.24  + 7/2)  | - 0.18  + 15/2) | + 0.14  - 7/2) | + 0.11  - 15/2) | - 0.07  - 9/2)  |
| 541.19                     | - 0.80  + 1/2)  | - 0.49  - 1/2)  | - 0.24  - 7/2)  | - 0.18  - 15/2) | - 0.14  + 7/2) | - 0.11  + 15/2) | - 0.07  + 9/2)  |
| 569.63                     | + 0.80  - 3/2)  | + 0.60  + 5/2)  | - 0.07  + 13/2) | - 0.03  - 11/2) |                |                 |                 |
| 569.63                     | + 0.80  + 3/2)  | + 0.60  - 5/2)  | - 0.07  - 13/2) | - 0.03  + 11/2) |                |                 |                 |
| 636.16                     | - 0.97  + 15/2) | + 0.20  + 7/2)  | + 0.16  - 1/2)  |                 |                |                 |                 |
| 636.16                     | + 0.97  - 15/2) | - 0.20  - 7/2)  | - 0.16  + 1/2)  |                 |                |                 |                 |
| [Ho(TPP)(cyclen)]Cl        |                 |                 |                 |                 |                |                 |                 |
| Energy (cm <sup>-1</sup> ) | Wave Function   |                 |                 |                 |                |                 |                 |
| 0.00                       | - 0.68  + 4)    | - 0.68  - 4)    | + 0.21  + 8)    | + 0.21  - 8)    | + 0.04  0)     |                 |                 |
| 0.72                       | + 0.68  + 4)    | - 0.68  - 4)    | - 0.21  + 8)    | + 0.21  - 8)    |                |                 |                 |
| 5.10                       | + 0.70  + 5)    | - 0.70  - 5)    | - 0.11  + 1)    | + 0.11  - 1)    | + 0.04  + 3)   | - 0.04  - 3)    |                 |
| 5.10                       | - 0.70  + 5)    | - 0.70  - 5)    | + 0.11  + 1)    | + 0.11  - 1)    | + 0.04  + 3)   | + 0.04  - 3)    |                 |
| 57.84                      | + 0.61  + 6)    | + 0.61  - 6)    | - 0.35  + 2)    | - 0.35  - 2)    |                |                 |                 |
| 70.38                      | - 0.61  + 3)    | - 0.61  - 3)    | + 0.36  + 7)    | + 0.36  - 7)    | - 0.05  + 5)   | - 0.05  - 5)    |                 |
| 70.38                      | + 0.61  + 3)    | - 0.61  - 3)    | - 0.36  + 7)    | + 0.36  - 7)    | - 0.05  + 5)   | + 0.05  - 5)    |                 |
| 76.21                      | + 0.65  + 6)    | - 0.65  - 6)    | - 0.27  + 2)    | + 0.27  - 2)    |                |                 |                 |
| 333.25                     | + 0.61  + 2)    | + 0.61  - 2)    | + 0.35  + 6)    | + 0.35  - 6)    |                |                 |                 |
| 373.22                     | + 0.67  + 8)    | + 0.67  - 8)    | + 0.21  + 4)    | + 0.21  - 4)    | - 0.05  0)     |                 |                 |
| 373.50                     | - 0.68  + 8)    | + 0.68  - 8)    | - 0.21  + 4)    | + 0.21  - 4)    |                |                 |                 |
| 378.11                     | + 0.60  + 7)    | + 0.60  - 7)    | + 0.34  + 3)    | + 0.34  - 3)    | + 0.14  + 1)   | + 0.14  - 1)    |                 |
| 378.11                     | - 0.60  + 7)    | + 0.60  - 7)    | - 0.34  + 3)    | + 0.34  - 3)    | + 0.14  + 1)   | - 0.14  - 1)    |                 |
| 409.10                     | + 0.65  + 2)    | - 0.65  - 2)    | + 0.27  + 6)    | - 0.27  - 6)    |                |                 |                 |
| 458.28                     | + 0.68  + 1)    | + 0.68  - 1)    | - 0.11  + 3)    | - 0.11  - 3)    | + 0.11  + 5)   | + 0.11  - 5)    |                 |
| 458.28                     | - 0.68  + 1)    | + 0.68  - 1)    | - 0.11  + 3)    | + 0.11  - 3)    | - 0.11  + 5)   | + 0.11  - 5)    |                 |
| 492.54                     | - 1.00  0)      | - 0.04  + 4)    | - 0.04  - 4)    |                 |                |                 |                 |
| [Er(TPP)(cyclen)]Cl        |                 |                 |                 |                 |                |                 |                 |
| Energy (cm <sup>-1</sup> ) | Wave Function   |                 |                 |                 |                |                 |                 |
| 0.00                       | + 1.00  + 1/2)  | + 0.11  + 9/2)  | + 0.04  - 7/2)  |                 |                |                 |                 |
| 0.00                       | - 1.00  - 1/2)  | - 0.11  - 9/2)  | - 0.04  + 7/2)  |                 |                |                 |                 |
| 77.91                      | + 0.84  + 3/2)  | + 0.43  - 3/2)  | + 0.26  + 11/2) | + 0.13  - 11/2) | - 0.10  - 5/2) | - 0.09  - 13/2) |                 |
| 77.91                      | - 0.84  - 3/2)  | + 0.43  + 3/2)  | - 0.26  - 11/2) | + 0.13  + 11/2) | + 0.10  + 5/2) | + 0.09  + 13/2) |                 |
| 113.04                     | + 0.82  - 13/2) | + 0.55  - 5/2)  | + 0.14  + 3/2)  | + 0.05  + 11/2) |                |                 |                 |
| 113.04                     | - 0.82  + 13/2) | - 0.55  + 5/2)  | - 0.14  - 3/2)  | - 0.05  - 11/2) |                |                 |                 |
| 121.84                     | + 0.96  - 15/2) | + 0.27  - 7/2)  | - 0.03  + 1/2)  |                 |                |                 |                 |
| 121.84                     | + 0.96  + 15/2) | + 0.27  + 7/2)  | - 0.03  - 1/2)  |                 |                |                 |                 |
| 327.70                     | - 0.83  - 5/2)  | + 0.56  - 13/2) | - 0.06  + 11/2) |                 |                |                 |                 |
| 327.70                     | - 0.83  + 5/2)  | + 0.56  + 13/2) | - 0.06  - 11/2) |                 |                |                 |                 |
| 376.12                     | + 0.95  + 11/2) | - 0.30  + 3/2)  | - 0.04  - 5/2)  | + 0.04  - 11/2) |                |                 |                 |
| 376.12                     | + 0.95  - 11/2) | - 0.30  - 3/2)  | - 0.04  + 5/2)  | - 0.04  + 11/2) |                |                 |                 |
| 420.86                     | - 0.96  + 7/2)  | + 0.27  + 15/2) | + 0.06  - 9/2)  |                 |                |                 |                 |
| 420.86                     | - 0.96  - 7/2)  | + 0.27  - 15/2) | + 0.06  + 9/2)  |                 |                |                 |                 |
| 446.02                     | + 0.99  + 9/2)  | - 0.11  + 1/2)  | - 0.09  - 9/2)  | + 0.06  - 7/2)  |                |                 |                 |
| 446.02                     | + 0.99  - 9/2)  | - 0.11  - 1/2)  | + 0.09  + 9/2)  | + 0.06  + 7/2)  |                |                 |                 |
| [Tm(TPP)(cyclen)]Cl        |                 |                 |                 |                 |                |                 |                 |
| Energy (cm <sup>-1</sup> ) | Wave Functions  |                 |                 |                 |                |                 |                 |
| 0.00                       | - 0.61  + 6)    | - 0.61  - 6)    | - 0.36  + 2)    | - 0.36  - 2)    |                |                 |                 |
| 2.87                       | - 0.71  + 6)    | + 0.71  - 6)    |                 |                 |                |                 |                 |

|                            |                |                |              |              |              |              |
|----------------------------|----------------|----------------|--------------|--------------|--------------|--------------|
| 7.52                       | - 0.97  - 0)   | - 0.16  + 4)   | - 0.16  - 4) |              |              |              |
| 7.61                       | - 0.66  + 1)   | + 0.66  - 1)   | + 0.26  + 3) | - 0.26  - 3) | - 0.05  + 5) | + 0.05  - 5) |
| 7.61                       | + 0.66  + 1)   | + 0.66  - 1)   | + 0.26  + 3) | + 0.26  - 3) | + 0.05  + 5) | + 0.05  - 5) |
| 11.37                      | - 0.61  + 2)   | - 0.61  - 2)   | + 0.36  + 6) | + 0.36  - 6) |              |              |
| 204.68                     | - 0.71  + 2)   | + 0.71  - 2)   |              |              |              |              |
| 264.52                     | - 0.66  + 3)   | - 0.66  - 3)   | + 0.26  + 1) | + 0.26  - 1) | + 0.04  + 5) | + 0.04  - 5) |
| 264.52                     | - 0.66  + 3)   | + 0.66  - 3)   | - 0.26  + 1) | + 0.26  - 1) | - 0.04  + 5) | + 0.04  - 5) |
| 390.21                     | + 0.71  + 4)   | - 0.71  - 4)   |              |              |              |              |
| 410.39                     | + 0.69  + 4)   | + 0.69  - 4)   | - 0.22 0)    |              |              |              |
| 443.39                     | - 0.70  + 5)   | + 0.70  - 5)   | + 0.06  + 1) | - 0.06  - 1) |              |              |
| 443.39                     | + 0.70  + 5)   | + 0.70  - 5)   | - 0.06  + 1) | - 0.06  - 1) |              |              |
| [Yb(TPP)(cyclen)]Cl        |                |                |              |              |              |              |
| Energy (cm <sup>-1</sup> ) | Wave Functions |                |              |              |              |              |
| 0.00                       | + 0.93  + 5/2) | - 0.35  - 3/2) |              |              |              |              |
| 0.00                       | - 0.93  - 5/2) | + 0.35  + 3/2) |              |              |              |              |
| 306.87                     | - 0.93  + 3/2) | - 0.35  - 5/2) |              |              |              |              |
| 306.87                     | + 0.93  - 3/2) | + 0.35  + 5/2) |              |              |              |              |
| 353.66                     | - 0.87  - 1/2) | + 0.50  + 7/2) |              |              |              |              |
| 353.66                     | + 0.87  + 1/2) | - 0.50  - 7/2) |              |              |              |              |
| 551.81                     | - 0.87  + 7/2) | - 0.50  - 1/2) |              |              |              |              |
| 551.81                     | + 0.87  - 7/2) | + 0.50  + 1/2) |              |              |              |              |

**Table S4.** Electronic structures of [Ln(TPP)(cyclen)]Cl generated by LF parameters with  $D_{4d}$  symmetry (Energies and wave functions).

| [Tb(TPP)(cyclen)]Cl        |                         | [Dy(TPP)(cyclen)]Cl        |                         | [Ho(TPP)(cyclen)]Cl        |                     |
|----------------------------|-------------------------|----------------------------|-------------------------|----------------------------|---------------------|
| Energy (cm <sup>-1</sup> ) | Wave function           | Energy (cm <sup>-1</sup> ) | Wave function           | Energy (cm <sup>-1</sup> ) | Wave function       |
| 0.00                       | +0.85 +6> +0.52 -6>     | 0.00                       | +0.28 +5.5> +0.96 -5.5> | 0.00                       | +1.00 +5> -0.03 -5> |
| 0.00                       | +0.85 -6> +0.52 +6>     | 0.00                       | -0.96 +5.5> +0.28 -5.5> | 0.00                       | -0.03 +5> -1.00 -5> |
| 166.45                     | -1.00 0>                | 48.12                      | +0.98 +6.5> +0.18 -6.5> | 9.63                       | -0.74 +4> -0.67 -4> |
| 197.44                     | -0.71 +1> -0.71 -1>     | 48.12                      | +0.18 +6.5> -0.98 -6.5> | 9.63                       | +0.67 +4> -0.74 -4> |
| 197.44                     | +0.71 +1> -0.71 -1>     | 106.91                     | +0.02 +4.5> -1.00 -4.5> | 99.91                      | +0.71 +6> +0.70 -6> |
| 284.01                     | -0.71 +2> +0.71 -2>     | 106.91                     | +1.00 +4.5> +0.02 -4.5> | 99.91                      | +0.70 +6> -0.71 -6> |
| 284.01                     | +0.71 +2> +0.71 -2>     | 237.16                     | +1.00 +3.5> -0.04 -3.5> | 111.51                     | +0.71 +3> +0.71 -3> |
| 401.44                     | +0.71 +3> +0.71 -3>     | 237.16                     | +0.04 +3.5> +1.00 -3.5> | 111.51                     | +0.71 +3> -0.71 -3> |
| 401.44                     | +0.71 +3> -0.71 -3>     | 336.89                     | -1.00 -2.5>             | 248.55                     | -0.08 +7> -1.00 -7> |
| 430.21                     | -1.00 -5>               | 336.89                     | -1.00 +2.5>             | 248.55                     | +1.00 +7> -0.08 -7> |
| 430.21                     | +1.00 +5>               | 395.78                     | +1.00 +1.5> +0.03 -1.5> | 250.50                     | -0.66 +2> +0.75 -2> |
| 490.49                     | -0.71 +4> +0.70 -4>     | 395.78                     | +0.03 +1.5> -1.00 -1.5> | 250.50                     | -0.75 +2> -0.66 -2> |
| 490.49                     | -0.70 +4> -0.71 -4>     | 421.22                     | +0.85 +0.5> -0.53 -0.5> | 257.84                     | +1.00 -8>           |
|                            |                         | 421.22                     | +0.53 +0.5> +0.85 -0.5> | 257.84                     | -1.00 +8>           |
|                            |                         | 503.70                     | +1.00 +7.5>             | 364.85                     | -0.71 +1> +0.71 -1> |
|                            |                         | 503.70                     | +1.00 -7.5>             | 364.85                     | -0.71 +1> -0.71 -1> |
|                            |                         |                            |                         | 408.57                     | +1.00 0>            |
| [Er(TPP)(cyclen)]Cl        |                         |                            |                         |                            |                     |
| [Er(TPP)(cyclen)]Cl        |                         | [Tm(TPP)(cyclen)]Cl        |                         | [Yb(TPP)(cyclen)]Cl        |                     |
| Energy (cm <sup>-1</sup> ) | Wave function           | Energy (cm <sup>-1</sup> ) | Wave function           | Energy (cm <sup>-1</sup> ) | Wave function       |
| 0.00                       | -0.73 +0.5> -0.69 -0.5> | 0.00                       | -1.00 0>                | 0.00                       | -0.90 +2.5>         |
| 0.00                       | +0.69 +0.5> -0.73 -0.5> | 0.13                       | +0.71 +6> -0.71 -6>     | 0.00                       | +0.44 -2.5>         |
|                            |                         |                            |                         | 0.00                       | +0.44 +2.5>         |
|                            |                         |                            |                         |                            | +0.90 -2.5>         |

|        |                            |        |                     |        |                            |
|--------|----------------------------|--------|---------------------|--------|----------------------------|
| 83.66  | +0.29 +1.5> +0.96 -1.5>    | 0.13   | +0.71 +6> +0.71 -6> | 180.95 | +1.00 -1.5>                |
| 83.66  | -0.96 +1.5> +0.29 -1.5>    | 18.72  | +0.71 +1> -0.71 -1> | 180.95 | +1.00 +1.5>                |
| 122.37 | +1.00 -7.5>                | 18.72  | +0.71 +1> +0.71 -1> | 325.18 | -0.52 +0.5><br>+0.86 -0.5> |
| 122.37 | +1.00 +7.5>                | 80.85  | -0.70 +2> +0.71 -2> | 325.18 | +0.86 +0.5><br>+0.52 -0.5> |
| 149.90 | -0.03 +6.5> +1.00 -6.5>    | 80.85  | +0.71 +2> +0.70 -2> | 405.22 | -1.00 +3.5>                |
| 149.90 | -1.00 +6.5> -0.03 -6.5>    | 192.66 | +0.71 +3> +0.71 -3> | 405.22 | +1.00 -3.5>                |
| 214.31 | -0.16 +2.5> +0.99 -2.5>    | 192.66 | -0.71 +3> +0.71 -3> |        |                            |
| 214.31 | -0.99  2.5><br>-0.16 -2.5> | 325.94 | +0.71 +4> +0.71 -4> |        |                            |
| 291.33 | -1.00 +5.5>                | 325.94 | -0.71 +4> +0.71 -4> |        |                            |
| 291.33 | -1.00 -5.5>                | 359.93 | -1.00 -5.0>         |        |                            |
| 330.01 | +1.00 -3.5>                | 359.93 | -1.00 +5>           |        |                            |
| 330.01 | -1.00 +3.5>                |        |                     |        |                            |
| 366.47 | -1.00 +4.5> +0.02 -4.5>    |        |                     |        |                            |
| 366.47 | -0.02 +4.5> -1.00 -4.5>    |        |                     |        |                            |

#### Ab initio Calculation details

Apart from geometry optimization, all calculations were employed on MOLCAS 8.0 such as SCF, CASSCF, RASSI and SINGLE\_ANISO type. Four basis set approximations have been used for calculations. The details of basis sets are summarized in Table S5.

**Table S5.** The employed basis sets for theoretical calculations.

| Basis set 1             | Basis set 2               |
|-------------------------|---------------------------|
| Ln.ANO-RCC...7s6p4d2f1g | Ln.ANO-RCC...8s7p5d3f2g1h |
| N.ANO-RCC...3s2p1d      | N.ANO-RCC...3s2p1d        |
| C.ANO-RCC...2s1p        | C.ANO-RCC...2s1p          |
| H.ANO-RCC...1s          | H.ANO-RCC...1s            |

**Table S6.** Ab initio ligand-field parameters  $B_n^m$  (in  $\text{cm}^{-1}$ ) of the  $[\text{Tb}(\text{TPP})(\text{cyclen})]^+$

| n | m | Experimental Geometry |                | Symmetrized- $C_4$ Geometry |                |
|---|---|-----------------------|----------------|-----------------------------|----------------|
|   |   | Real part             | Imaginary part | Real part                   | Imaginary part |
| 2 | 0 | <b>124.80</b>         | <b>0.00</b>    | <b>124.00</b>               | <b>0</b>       |
|   | 1 | -15.17                | -15.17         | 0.00                        | 0              |
|   | 2 | -13.73                | 16.44          | -0.01                       | 0              |
| 4 | 0 | <b>-126.58</b>        | <b>0.00</b>    | <b>-121.20</b>              | <b>0</b>       |
|   | 1 | -6.69                 | 1.78           | 0.00                        | 0              |
|   | 2 | -4.11                 | -4.11          | -0.02                       | 0              |
|   | 3 | 9.58                  | 0.85           | 0.00                        | 0              |
|   | 4 | <b>57.71</b>          | <b>54.74</b>   | <b>-85.94</b>               | <b>20</b>      |
| 6 | 0 | <b>8.06</b>           | <b>0.00</b>    | <b>7.61</b>                 | <b>0</b>       |
|   | 1 | 1.88                  | -0.97          | 0.00                        | 0              |
|   | 2 | -0.38                 | -1.70          | 0.00                        | 0              |
|   | 3 | 3.52                  | 3.52           | 0.00                        | 0              |
|   | 4 | <b>-0.55</b>          | <b>-12.31</b>  | <b>11.90</b>                | <b>5</b>       |
|   | 5 | 1.34                  | -2.28          | 0.00                        | 0              |
|   | 6 | -0.62                 | 1.95           | 0.00                        | 0              |

**Table S7.** CASSCF/RASSI calculated energies and wave functions of the  $[\text{Tb}(\text{TPP})(\text{cyclen})]^+$  with an absolute coefficient larger than 0.04.

| Symmetrized- $C_4$         |                                                                                        |                            |                                               |
|----------------------------|----------------------------------------------------------------------------------------|----------------------------|-----------------------------------------------|
| Basis Set 1                |                                                                                        | Basis Set 2                |                                               |
| Energy (cm <sup>-1</sup> ) | Wave Function                                                                          | Energy (cm <sup>-1</sup> ) | Wave Function                                 |
| 0.00                       | $ \pm 6\rangle,  \pm 2\rangle$                                                         | 0.00                       | $ \pm 6\rangle,  \pm 2\rangle$                |
| 0.26                       | $ \pm 6\rangle,  \pm 2\rangle$                                                         | 0.25                       | $ \pm 6\rangle,  \pm 2\rangle$                |
| 126                        | $ 0\rangle,  \pm 4\rangle$                                                             | 138                        | $ 0\rangle,  \pm 4\rangle$                    |
| 130                        | $ \pm 1\rangle,  \pm 5\rangle,  \pm 3\rangle$                                          | 142                        | $ \pm 1\rangle,  \pm 5\rangle,  \pm 3\rangle$ |
| 130                        | $ \pm 1\rangle,  \pm 5\rangle,  \pm 3\rangle$                                          | 142                        | $ \pm 1\rangle,  \pm 5\rangle,  \pm 3\rangle$ |
| 148                        | $ \pm 2\rangle,  \pm 6\rangle$                                                         | 162                        | $ \pm 2\rangle,  \pm 6\rangle$                |
| 190                        | $ \pm 5\rangle,  \pm 3\rangle,  \pm 1\rangle$                                          | 200                        | $ \pm 5\rangle,  \pm 3\rangle,  \pm 1\rangle$ |
| 190                        | $ \pm 5\rangle,  \pm 3\rangle,  \pm 1\rangle$                                          | 200                        | $ \pm 5\rangle,  \pm 3\rangle,  \pm 1\rangle$ |
| 216                        | $ \pm 2\rangle,  \pm 6\rangle$                                                         | 233                        | $ \pm 2\rangle,  \pm 6\rangle$                |
| 235                        | $ \pm 3\rangle,  \pm 1\rangle,  \pm 5\rangle$                                          | 252                        | $ \pm 3\rangle,  \pm 1\rangle,  \pm 5\rangle$ |
| 235                        | $ \pm 3\rangle,  \pm 1\rangle,  \pm 5\rangle$                                          | 252                        | $ \pm 3\rangle,  \pm 1\rangle,  \pm 5\rangle$ |
| 239                        | $ \pm 4\rangle$                                                                        | 254                        | $ \pm 4\rangle$                               |
| 257                        | $ \pm 4\rangle,  0\rangle$                                                             | 273                        | $ \pm 4\rangle,  0\rangle$                    |
| Experimental geometry      |                                                                                        |                            |                                               |
| Basis Set 2                |                                                                                        |                            |                                               |
| Energy (cm <sup>-1</sup> ) | Wave Function                                                                          |                            |                                               |
| 0.00                       | $ \pm 6\rangle,  \pm 2\rangle$                                                         |                            |                                               |
| 0.17                       | $ \pm 6\rangle,  \pm 2\rangle$                                                         |                            |                                               |
| 140                        | $ 0\rangle,  \pm 1\rangle,  \pm 5\rangle,  \pm 3\rangle,  \pm 4\rangle,  \pm 2\rangle$ |                            |                                               |
| 142                        | $ 0\rangle,  \pm 1\rangle,  \pm 4\rangle,  \pm 2\rangle,  \pm 5\rangle,  \pm 3\rangle$ |                            |                                               |
| 155                        | $ \pm 1\rangle,  \pm 5\rangle,  \pm 3\rangle$                                          |                            |                                               |
| 171                        | $ \pm 2\rangle,  0\rangle,  \pm 5\rangle,  \pm 4\rangle,  \pm 3\rangle,  \pm 6\rangle$ |                            |                                               |
| 204                        | $ \pm 5\rangle,  \pm 1\rangle,  \pm 3\rangle,  \pm 2\rangle,  \pm 4\rangle$            |                            |                                               |
| 206                        | $ \pm 5\rangle,  \pm 1\rangle,  \pm 3\rangle,  \pm 2\rangle$                           |                            |                                               |
| 232                        | $ \pm 2\rangle,  \pm 5\rangle,  \pm 4\rangle,  \pm 1\rangle,  \pm 3\rangle$            |                            |                                               |
| 250                        | $ \pm 3\rangle,  \pm 4\rangle,  \pm 1\rangle,  \pm 5\rangle$                           |                            |                                               |
| 255                        | $ \pm 3\rangle,  \pm 1\rangle,  \pm 4\rangle,  \pm 2\rangle,  \pm 5\rangle$            |                            |                                               |
| 267                        | $ \pm 4\rangle,  \pm 3\rangle,  \pm 1\rangle,  \pm 2\rangle,  \pm 5\rangle$            |                            |                                               |
| 279                        | $ \pm 4\rangle,  0\rangle,  \pm 3\rangle$                                              |                            |                                               |

**Table S8.** Composition of wave functions for [Tb(Por)(cyclen)]<sup>+</sup> as extracted from CASSCF/RASSI/Single\_Aniso calculations with basis set 1.

| $M_J$ | Wave Functions and Energies |                 |                       |                 |                      |                 |
|-------|-----------------------------|-----------------|-----------------------|-----------------|----------------------|-----------------|
|       | 1                           |                 | 2                     |                 | 3                    |                 |
|       | 0.00 cm <sup>-1</sup>       |                 | 0.26 cm <sup>-1</sup> |                 | 126 cm <sup>-1</sup> |                 |
|       | c                           | c               | c                     | c               | c                    | c               |
| -6    | 0.702568-0.054416i          | <b>0.704672</b> | -0.703732+0.054503i   | <b>0.705839</b> | -0.000027+0.000006i  | 0.000028        |
| -5    | 0                           | 0.000000        | 0                     | 0.000000        | 0                    | 0.000000        |
| -4    | 0.000021-0.000001i          | 0.000021        | -0.000021+0.000001i   | 0.000021        | -0.24786+0.012483i   | 0.248174        |
| -3    | 0                           | 0.000000        | 0                     | 0.000000        | 0                    | 0.000000        |
| -2    | 0.058611+0.001527i          | 0.058631        | -0.042306-0.001082i   | 0.042320        | 0.000403-0.000031i   | 0.000404        |
| -1    | 0                           | 0.000000        | 0                     | 0.000000        | 0                    | 0.000000        |
| 0     | -0.000002                   | 0.000002        | 0.000001i             | 0.000001        | -0.930349+0.106157i  | <b>0.936386</b> |
| 1     | 0                           | 0.000000        | 0                     | 0.000000        | 0                    | 0.000000        |
| 2     | 0.058318-0.006049i          | 0.058631        | 0.042096-0.004345i    | 0.042320        | 0.0004-0.000061i     | 0.000405        |
| 3     | 0                           | 0.000000        | 0                     | 0.000000        | 0                    | 0.000000        |

|   |                    |                 |                    |                 |                   |          |
|---|--------------------|-----------------|--------------------|-----------------|-------------------|----------|
| 4 | 0.000021-0.000001i | 0.000021        | 0.000021-0.000001i | 0.000021        | -0.2443+0.043675i | 0.248173 |
| 5 | 0                  | 0.000000        | 0                  | 0.000000        | 0                 | 0.000000 |
| 6 | 0.704672           | <b>0.704672</b> | 0.705839           | <b>0.705839</b> | -0.000028         | 0.000028 |

| $M_J$ | 4                    |                 | 5                    |                 | 6                    |                 |
|-------|----------------------|-----------------|----------------------|-----------------|----------------------|-----------------|
|       | 130 cm <sup>-1</sup> |                 | 130 cm <sup>-1</sup> |                 | 148 cm <sup>-1</sup> |                 |
|       | c                    | c               | c                    | c               | c                    | c               |
| -6    | 0                    | 0.000000        | 0                    | 0.000000        | -0.058469+0.004356i  | 0.058631        |
| -5    | -0.261199+0.069708i  | 0.270341        | -0.145483-0.228011i  | 0.270471        | 0                    | 0.000000        |
| -4    | 0                    | 0.000000        | 0                    | 0.000000        | 0.000175+0.000005i   | 0.000175        |
| -3    | 0.22338-0.02647i     | 0.224943        | -0.092763-0.204925i  | 0.224943        | 0                    | 0.000000        |
| -2    | 0                    | 0.000000        | 0                    | 0.000000        | 0.704374+0.020475i   | <b>0.704672</b> |
| -1    | -0.595294+0.148125i  | <b>0.613446</b> | -0.321152-0.522597i  | <b>0.613389</b> | 0                    | 0.000000        |
| 0     | 0                    | 0.000000        | 0                    | 0.000000        | 0.000518-0.000019i   | 0.000518        |
| 1     | 0.596866-0.14166i    | <b>0.613446</b> | -0.315465-0.52605i   | <b>0.613390</b> | 0                    | 0.000000        |
| 2     | 0                    | 0.000000        | 0                    | 0.000000        | 0.700906-0.072749i   | <b>0.704671</b> |
| 3     | -0.210606+0.079022i  | 0.224943        | -0.139007-0.176851i  | 0.224943        | 0                    | 0.000000        |
| 4     | 0                    | 0.000000        | 0                    | 0.000000        | 0.000174-0.000018i   | 0.000175        |
| 5     | 0.264052-0.057968i   | 0.270340        | -0.135164-0.234276i  | 0.270471        | 0                    | 0.000000        |
| 6     | 0                    | 0.000000        | 0                    | 0.000000        | -0.058631            | 0.058631        |

| $M_J$ | 7                    |                 | 8                    |                 | 9                    |                 |
|-------|----------------------|-----------------|----------------------|-----------------|----------------------|-----------------|
|       | 190 cm <sup>-1</sup> |                 | 190 cm <sup>-1</sup> |                 | 216 cm <sup>-1</sup> |                 |
|       | c                    | c               | c                    | c               | c                    | c               |
| -6    | 0                    | 0.000000        | 0                    | 0.000000        | 0.042207-0.003088i   | 0.042320        |
| -5    | 0.621901-0.147189i   | <b>0.639082</b> | 0.534861+0.349751i   | <b>0.639063</b> | 0                    | 0.000000        |
| -4    | 0                    | 0.000000        | 0                    | 0.000000        | -0.000063-0.000009i  | 0.000064        |
| -3    | 0.225101-0.043119i   | 0.229194        | -0.186145-0.133534i  | 0.229088        | 0                    | 0.000000        |
| -2    | 0                    | 0.000000        | 0                    | 0.000000        | -0.705528-0.020975i  | <b>0.705840</b> |
| -1    | -0.193041+0.042179i  | 0.197595        | -0.163637-0.111085i  | 0.197780        | 0                    | 0.000000        |
| 0     | 0                    | 0.000000        | 0                    | 0.000000        | -0.000013i           | 0.000013        |
| 1     | 0.188441-0.059447i   | 0.197595        | -0.173003-0.095849i  | 0.197780        | 0                    | 0.000000        |
| 2     | 0                    | 0.000000        | 0                    | 0.000000        | 0.702116-0.072401i   | <b>0.705839</b> |
| 3     | -0.21672+0.074581i   | 0.229194        | -0.203196-0.105797i  | 0.229089        | 0                    | 0.000000        |
| 4     | 0                    | 0.000000        | 0                    | 0.000000        | 0.000062-0.000014i   | 0.000064        |
| 5     | -0.612706+0.181707i  | <b>0.639082</b> | 0.55357+0.319315i    | <b>0.639063</b> | 0                    | 0.000000        |
| 6     | 0                    | 0.000000        | 0                    | 0.000000        | -0.04232             | 0.042320        |

| $M_J$ | 10                   |                 | 11                   |                 | 12                   |                 |
|-------|----------------------|-----------------|----------------------|-----------------|----------------------|-----------------|
|       | 235 cm <sup>-1</sup> |                 | 235 cm <sup>-1</sup> |                 | 239 cm <sup>-1</sup> |                 |
|       | c                    | c               | c                    | c               | c                    | c               |
| -6    | 0                    | 0.000000        | 0                    | 0               | -0.000017-0.000001i  | 1.7E-05         |
| -5    | -0.097405+0.094638i  | 0.135809        | -0.008382-0.135719i  | 0.135978        | 0                    | 0               |
| -4    | 0                    | 0.000000        | 0                    | 0               | 0.703315+0.073133i   | <b>0.707107</b> |
| -3    | -0.443058+0.447905i  | <b>0.630015</b> | 0.051263+0.627887i   | <b>0.629976</b> | 0                    | 0               |
| -2    | 0                    | 0.000000        | 0                    | 0               | -0.000064-0.000006i  | 6.43E-05        |
| -1    | 0.211809-0.199432i   | 0.290923        | 0.013351+0.290623i   | 0.29093         | 0                    | 0               |
| 0     | 0                    | 0.000000        | 0                    | 0               | 0.000012-0.000315i   | 0.000315        |
| 1     | 0.179419-0.229009i   | 0.290923        | -0.056912-0.285308i  | 0.290929        | 0                    | 0               |
| 2     | 0                    | 0.000000        | 0                    | 0               | 0.000064-0.000001i   | 6.4E-05         |
| 3     | -0.405915+0.481822i  | <b>0.630015</b> | -0.101195-0.621796i  | <b>0.629977</b> | 0                    | 0               |
| 4     | 0                    | 0.000000        | 0                    | 0               | -0.706892+0.017435i  | <b>0.707107</b> |
| 5     | -0.085422+0.10558i   | 0.135809        | 0.024493+0.133753i   | 0.135977        | 0                    | 0               |
| 6     | 0                    | 0.000000        | 0                    | 0               | 0.000017             | 0.000017        |

| $M_J$ | 13                   |                 |
|-------|----------------------|-----------------|
|       | 257 cm <sup>-1</sup> |                 |
|       | c                    | c               |
| -6    | -0.000017-0.000001i  | 0.000017        |
| -5    | 0                    | 0.000000        |
| -4    | 0.658564+0.068581i   | <b>0.662125</b> |
| -3    | 0                    | 0.000000        |
| -2    | -0.000037            | 0.000037        |
| -1    | 0                    | 0.000000        |
| 0     | -0.350697-0.013863i  | 0.350971        |
| 1     | 0                    | 0.000000        |
| 2     | -0.000037-0.000003i  | 0.000037        |
| 3     | 0                    | 0.000000        |
| 4     | 0.661923-0.016382i   | <b>0.662126</b> |
| 5     | 0                    | 0.000000        |
| 6     | -0.000017            | 0.000017        |

**Table S9.** Composition of wave functions for [Tb(Por)(cyclen)]<sup>+</sup> as extracted from CASSCF/RASSI/Single\_Aniso calculations with basis set 2.

| $M_J$ | Wave Functions and Energies |                 |                       |                 |                      |                 |
|-------|-----------------------------|-----------------|-----------------------|-----------------|----------------------|-----------------|
|       | 1                           |                 | 2                     |                 | 3                    |                 |
|       | 0.00 cm <sup>-1</sup>       |                 | 0.25 cm <sup>-1</sup> |                 | 138 cm <sup>-1</sup> |                 |
|       | c                           | c               | c                     | c               | c                    | c               |
| -6    | 0.579254+0.401511i          | <b>0.704802</b> | -0.580129-0.402122i   | <b>0.70587</b>  | -0.000013-0.000006i  | 1.43E-05        |
| -5    | 0                           | 0               | 0                     | 0               | 0                    | 0               |
| -4    | 0.000012+0.000007i          | 1.39E-05        | -0.000012-0.000007i   | 1.39E-05        | -0.224453-0.121722i  | 0.255334        |
| -3    | 0                           | 0               | 0                     | 0               | 0                    | 0               |
| -2    | 0.050614+0.02631i           | 0.057044        | -0.037118-0.019272i   | 0.041823        | 0.000225+0.000084i   | 0.00024         |
| -1    | 0                           | 0               | 0                     | 0               | 0                    | 0               |
| 0     | 0                           | 0               | 0.000001i             | 0.000001        | -0.912106-0.194091i  | <b>0.932528</b> |
| 1     | 0                           | 0               | 0                     | 0               | 0                    | 0               |
| 2     | 0.056586+0.00721i           | 0.057043        | 0.041484+0.005307i    | 0.041822        | 0.00024+0.000015i    | 0.00024         |
| 3     | 0                           | 0               | 0                     | 0               | 0                    | 0               |
| 4     | 0.000014+0.000001i          | 1.4E-05         | 0.000014+0.000001i    | 1.4E-05         | -0.254566+0.019789i  | 0.255334        |
| 5     | 0                           | 0               | 0                     | 0               | 0                    | 0               |
| 6     | 0.704802                    | <b>0.704802</b> | 0.705869              | <b>0.705869</b> | -0.000015            | 0.000015        |

| $M_J$ | 4                    |                 | 5                    |                | 6                    |                 |
|-------|----------------------|-----------------|----------------------|----------------|----------------------|-----------------|
|       | 142 cm <sup>-1</sup> |                 | 142 cm <sup>-1</sup> |                | 162 cm <sup>-1</sup> |                 |
|       | c                    | c               | c                    |                | c                    | c               |
| -6    | 0                    | 0               | 0                    | 0              | -0.046781-0.032641i  | 0.057043        |
| -5    | -0.008953-0.297412i  | 0.297547        | 0.092031-0.283048i   | 0.297634       | 0                    | 0               |
| -4    | 0                    | 0               | 0                    | 0              | 0.000089+0.000061i   | 0.000108        |
| -3    | -0.001416+0.220643i  | 0.220648        | 0.075842-0.207203i   | 0.220647       | 0                    | 0               |
| -2    | 0                    | 0               | 0                    | 0              | 0.624324+0.327055i   | <b>0.704802</b> |
| -1    | -0.142684-0.585168i  | <b>0.602312</b> | 0.063283-0.598936i   | <b>0.60227</b> | 0                    | 0               |
| 0     | 0                    | 0               | 0                    | 0              | 0.000291+0.000092i   | 0.000305        |
| 1     | 0.196376+0.569401i   | <b>0.602313</b> | 0.007426-0.602224i   | <b>0.60227</b> | 0                    | 0               |
| 2     | 0                    | 0               | 0                    | 0              | 0.699156+0.089033i   | <b>0.704802</b> |
| 3     | -0.120494-0.184842i  | 0.220648        | -0.051007-0.21467i   | 0.220647       | 0                    | 0               |
| 4     | 0                    | 0               | 0                    | 0              | 0.000108+0.000001i   | 0.000108        |

|   |                   |          |                     |          |           |          |
|---|-------------------|----------|---------------------|----------|-----------|----------|
| 5 | 0.15328+0.255027i | 0.297546 | -0.058186-0.291891i | 0.297634 | 0         | 0        |
| 6 | 0                 | 0        | 0                   | 0        | -0.057043 | 0.057043 |

| $M_J$ | 7                    |                 | 8                    |                 | 9                    |                 |
|-------|----------------------|-----------------|----------------------|-----------------|----------------------|-----------------|
|       | 200 cm <sup>-1</sup> |                 | 200 cm <sup>-1</sup> |                 | 233 cm <sup>-1</sup> |                 |
|       | c                    | c               | c                    | c               | c                    | c               |
| -6    | 0                    | 0               | 0                    | 0               | -0.034267-0.023978i  | 0.041823        |
| -5    | 0.38641-0.496096i    | <b>0.628827</b> | 0.182662+0.601691i   | <b>0.628806</b> | 0                    | 0               |
| -4    | 0                    | 0               | 0                    | 0               | 0.000026+0.000028i   | 3.82E-05        |
| -3    | 0.127494-0.193149i   | 0.231433        | -0.084322-0.215465i  | 0.231377        | 0                    | 0               |
| -2    | 0                    | 0               | 0                    | 0               | 0.62505+0.327968i    | <b>0.705869</b> |
| -1    | -0.098848+0.203084i  | 0.225863        | -0.109037-0.197935i  | 0.225981        | 0                    | 0               |
| 0     | 0                    | 0               | 0                    | 0               | -0.000002+0.000006i  | 6.32E-06        |
| 1     | 0.054512-0.219186i   | 0.225863        | -0.147769-0.170973i  | 0.225981        | 0                    | 0               |
| 2     | 0                    | 0               | 0                    | 0               | -0.700154-0.08964i   | <b>0.705869</b> |
| 3     | -0.026166+0.229949i  | 0.231433        | -0.172788-0.153882i  | 0.231377        | 0                    | 0               |
| 4     | 0                    | 0               | 0                    | 0               | -0.000037+0.000008i  | 3.79E-05        |
| 5     | -0.021999+0.628443i  | <b>0.628828</b> | 0.50085+0.380193i    | <b>0.628806</b> | 0                    | 0               |
| 6     | 0                    | 0               | 0                    | 0               | 0.041823             | 0.041823        |

| $M_J$ | 10                   |                 | 11                   |                 | 12                   |                 |
|-------|----------------------|-----------------|----------------------|-----------------|----------------------|-----------------|
|       | 252 cm <sup>-1</sup> |                 | 252 cm <sup>-1</sup> |                 | 254 cm <sup>-1</sup> |                 |
|       | c                    | c               | c                    | c               | c                    | c               |
| -6    | 0                    | 0               | 0                    | 0               | -0.000008-0.000008i  | 1.13E-05        |
| -5    | -0.124225-0.024186i  | 0.126558        | -0.096283+0.082288i  | 0.126656        | 0                    | 0               |
| -4    | 0                    | 0               | 0                    | 0               | 0.551135+0.443001i   | <b>0.707107</b> |
| -3    | -0.63069-0.003165i   | <b>0.630698</b> | 0.394801-0.491818i   | <b>0.630676</b> | 0                    | 0               |
| -2    | 0                    | 0               | 0                    | 0               | -0.000032-0.00002i   | 3.77E-05        |
| -1    | 0.293556-0.005295i   | 0.293604        | 0.178476-0.233135i   | 0.293608        | 0                    | 0               |
| 0     | 0                    | 0               | 0                    | 0               | 0.000123-0.0003i     | 0.000324        |
| 1     | 0.277395-0.096203i   | 0.293603        | -0.097231+0.277041i  | 0.293608        | 0                    | 0               |
| 2     | 0                    | 0               | 0                    | 0               | 0.000037+0.000009i   | 3.81E-05        |
| 3     | -0.590958+0.220338i  | <b>0.630698</b> | -0.195095+0.599742i  | <b>0.630676</b> | 0                    | 0               |
| 4     | 0                    | 0               | 0                    | 0               | -0.703512-0.071214i  | <b>0.707107</b> |
| 5     | -0.108278+0.065518i  | 0.126557        | 0.016079-0.125631i   | 0.126656        | 0                    | 0               |
| 6     | 0                    | 0               | 0                    | 0               | 0.000012             | 0.000012        |

| $M_J$ | 13                   |                 |
|-------|----------------------|-----------------|
|       | 273 cm <sup>-1</sup> |                 |
|       | c                    | c               |
| -6    | -0.000008-0.000008i  | 1.13E-05        |
| -5    | 0                    | 0               |
| -4    | 0.50753+0.420972i    | <b>0.659397</b> |
| -3    | 0                    | 0               |
| -2    | -0.000023-0.000008i  | 2.44E-05        |
| -1    | 0                    | 0               |
| 0     | -0.331994-0.142024i  | 0.361097        |
| 1     | 0                    | 0               |
| 2     | -0.000022-0.000011i  | 2.46E-05        |
| 3     | 0                    | 0               |
| 4     | 0.654964+0.076334i   | <b>0.659397</b> |
| 5     | 0                    | 0               |
| 6     | -0.000011            | 0.000011        |



**Table S10.** Composition of wave functions for [Tb(TPP)(cyclen)]<sup>+</sup> as extracted from CASSCF/RASSI/Single\_Aniso calculations with basis set 2.

| $M_J$ | Wave Functions and Energies |                 |                       |                 |                      |                 |
|-------|-----------------------------|-----------------|-----------------------|-----------------|----------------------|-----------------|
|       | 1                           |                 | 2                     |                 | 3                    |                 |
|       | 0.00 cm <sup>-1</sup>       |                 | 0.17 cm <sup>-1</sup> |                 | 140 cm <sup>-1</sup> |                 |
|       | c                           | c               | c                     | c               | c                    | c               |
| -6    | 0.585074+0.393945i          | <b>0.705300</b> | 0.585676+0.39435i     | <b>0.706065</b> | 0.010495-0.001964i   | 0.010677        |
| -5    | 0.000306-0.00068i           | 0.000700        | 0.000272-0.000649i    | 0.000704        | -0.181665+0.074244i  | 0.196251        |
| -4    | -0.003416+0.00538i          | 0.006400        | -0.003055+0.004905i   | 0.005777        | 0.078112-0.112122i   | 0.136649        |
| -3    | -0.004844-0.001474i         | 0.005100        | -0.005193-0.001645i   | 0.005447        | 0.040453-0.16723i    | 0.172053        |
| -2    | -0.003103-0.049067i         | 0.049200        | -0.002383-0.037329i   | 0.037405        | 0.062479+0.083615i   | 0.104380        |
| -1    | 0.001097+0.000555i          | 0.001200        | 0.002773-0.00084i     | 0.002897        | 0.429255+0.175515i   | <b>0.463751</b> |
| 0     | 0.004185+0.001278i          | 0.004400        | -0.000495+0.001621i   | 0.001695        | -0.609162+0.05652i   | <b>0.611778</b> |
| 1     | -0.00122-0.000152i          | 0.001200        | 0.001831+0.002246i    | 0.002898        | -0.389636+0.251494i  | <b>0.463752</b> |
| 2     | -0.029979+0.038968i         | 0.049200        | 0.022826-0.029633i    | 0.037405        | 0.046029-0.093683i   | 0.104800        |
| 3     | 0.004841+0.001483i          | 0.005100        | -0.005226-0.001536i   | 0.005447        | -0.070529-0.156933i  | 0.172053        |
| 4     | 0.000172-0.00637i           | 0.006400        | -0.000206+0.005775i   | 0.005779        | 0.097407+0.095837i   | 0.136649        |
| 5     | 0.000126-0.000735i          | 0.000700        | -0.000137+0.00069i    | 0.000703        | 0.192223+0.039554i   | 0.196250        |
| 6     | 0.70534                     | <b>0.705300</b> | -0.706065             | <b>0.706065</b> | 0.010677             | 0.010677        |

| $M_J$ | 4                    |                 | 5                    |                 | 6                    |                 |
|-------|----------------------|-----------------|----------------------|-----------------|----------------------|-----------------|
|       | 142 cm <sup>-1</sup> |                 | 155 cm <sup>-1</sup> |                 | 171 cm <sup>-1</sup> |                 |
|       | c                    | c               | c                    | c               | c                    | c               |
| -6    | 0.011321+0.010842i   | 0.015675        | -0.003057+0.000832i  | 0.003168        | 0.036921+0.026594i   | 0.045502        |
| -5    | 0.157263-0.010297i   | 0.157600        | -0.269128+0.143488i  | 0.304990        | -0.015016-0.058011i  | 0.059923        |
| -4    | 0.162942-0.056455i   | 0.172445        | -0.006734-0.015082i  | 0.016517        | -0.051308+0.02472i   | 0.056953        |
| -3    | -0.07446+0.121586i   | 0.142574        | -0.061502+0.169826i  | 0.180619        | 0.016393-0.048722i   | 0.051406        |
| -2    | 0.016971+0.169962i   | 0.170807        | -0.01584-0.020821i   | 0.026161        | 0.013212+0.672239i   | <b>0.672369</b> |
| -1    | -0.265266-0.316808i  | <b>0.413199</b> | 0.568584+0.223755i   | <b>0.611027</b> | 0.034405-0.00883i    | 0.03552         |
| 0     | -0.622419-0.249961i  | <b>0.670735</b> | -0.001129-0.008446i  | 0.008521        | 0.252195+0.081371i   | 0.264997        |
| 1     | 0.410704-0.045342i   | <b>0.413199</b> | 0.48983-0.365268i    | <b>0.611027</b> | -0.022756-0.027273i  | 0.035520        |
| 2     | 0.129811-0.111015i   | 0.170808        | 0.009813-0.024251i   | 0.026161        | 0.403615-0.537749i   | <b>0.672368</b> |
| 3     | -0.030316+0.139314i  | 0.142574        | -0.103957-0.147704i  | 0.180620        | 0.015175-0.049115i   | 0.051406        |
| 4     | 0.078636+0.153472i   | 0.172445        | 0.002535-0.016321i   | 0.016517        | -0.027185-0.050046i  | 0.056953        |
| 5     | -0.10646-0.116207i   | 0.157600        | -0.297371-0.067745i  | 0.304990        | 0.046089-0.038295i   | 0.059923        |
| 6     | 0.015675             | 0.015675        | 0.003168             | 0.003168        | 0.045502             | 0.045502        |

| $M_J$ | 7                    |                 | 8                    |                 | 9                    |                 |
|-------|----------------------|-----------------|----------------------|-----------------|----------------------|-----------------|
|       | 204 cm <sup>-1</sup> |                 | 206 cm <sup>-1</sup> |                 | 232 cm <sup>-1</sup> |                 |
|       | c                    | c               | c                    | c               | c                    | c               |
| -6    | 0.000128+0.0051i     | 0.005102        | -0.002598+0.002508i  | 0.003611        | -0.030667-0.020385i  | 0.036824        |
| -5    | -0.102342-0.622856i  | <b>0.631208</b> | -0.620716-0.12265i   | <b>0.632718</b> | -0.06519-0.093795i   | 0.114225        |
| -4    | 0.001685+0.04632i    | 0.046351        | 0.026669+0.013975i   | 0.030109        | -0.074285+0.079092i  | 0.108507        |
| -3    | 0.077652-0.187989i   | 0.203395        | 0.190036+0.082241i   | 0.207068        | 0.011033+0.054301i   | 0.055411        |
| -2    | -0.078841+0.089938i  | 0.119603        | -0.027248-0.041942i  | 0.050016        | -0.039921-0.67989i   | <b>0.681061</b> |
| -1    | 0.120653-0.168812i   | 0.207496        | -0.094586-0.210446i  | 0.230725        | -0.011577-0.080221i  | 0.081052        |
| 0     | -0.025625+0.026279i  | 0.036705        | 0.015333-0.006193i   | 0.016537        | 0.007536-0.02495i    | 0.026063        |
| 1     | -0.165719+0.124867i  | 0.207496        | -0.078109-0.217101i  | 0.230725        | -0.054051+0.060398i  | 0.081052        |
| 2     | -0.087924+0.081081i  | 0.119603        | 0.009526+0.0491i     | 0.050016        | 0.409626-0.544105i   | <b>0.681061</b> |
| 3     | -0.185974+0.082363i  | 0.203396        | -0.079606+0.191155i  | 0.207069        | 0.039249-0.039114i   | 0.055411        |
| 4     | -0.046348-0.000518i  | 0.046351        | 0.009481-0.028576i   | 0.030108        | 0.018079+0.10699i    | 0.108507        |
| 5     | -0.625236-0.08662i   | <b>0.631208</b> | 0.361401-0.519346i   | <b>0.632717</b> | -0.106213+0.042023i  | 0.114224        |
| 6     | -0.005101            | 0.005101        | -0.003611            | 0.003611        | 0.036824             | 0.036824        |

| $M_J$ | 10                   |                 | 11                   |                 | 12                   |                 |
|-------|----------------------|-----------------|----------------------|-----------------|----------------------|-----------------|
|       | 250 cm <sup>-1</sup> |                 | 255 cm <sup>-1</sup> |                 | 267 cm <sup>-1</sup> |                 |
|       | c                    | c               | c                    | c               | c                    | c               |
| -6    | -0.007687+0.00081i   | 0.007730        | -0.007618-0.001165i  | 0.007707        | -0.000344-0.000733i  | 0.000810        |
| -5    | -0.018794-0.121823i  | 0.123264        | 0.049026+0.057201i   | 0.075336        | -0.015109-0.080042i  | 0.081456        |
| -4    | 0.25347+0.197617i    | 0.321402        | 0.222922-0.015202i   | 0.223440        | -0.142765-0.577127i  | <b>0.594523</b> |
| -3    | -0.556645-0.132682i  | <b>0.572240</b> | -0.538705-0.28892i   | <b>0.611292</b> | -0.042225-0.322042i  | 0.324798        |
| -2    | -0.029412-0.016168i  | 0.033563        | -0.056338-0.077504i  | 0.095817        | -0.093103-0.048279i  | 0.104876        |
| -1    | 0.109615-0.201724i   | 0.229582        | -0.133804+0.204839i  | 0.244668        | 0.052386-0.142295i   | 0.151632        |
| 0     | -0.017515+0.00092i   | 0.017539        | -0.004311+0.056731i  | 0.056895        | -0.024519-0.015581i  | 0.029051        |
| 1     | -0.130145-0.189131i  | 0.229583        | -0.101313-0.222706i  | 0.244668        | 0.106576-0.10786i    | 0.151632        |
| 2     | -0.027556+0.01916i   | 0.033563        | 0.067402-0.0681i     | 0.095816        | -0.083249-0.063785i  | 0.104876        |
| 3     | 0.539682-0.190267i   | <b>0.572240</b> | -0.576179+0.204196i  | <b>0.611292</b> | 0.309488-0.098545i   | 0.324798        |
| 4     | 0.231373-0.223084i   | 0.321403        | -0.218065-0.048714i  | 0.223440        | -0.583124+0.115859i  | <b>0.594522</b> |
| 5     | 0.005928-0.123122i   | 0.123265        | 0.057107-0.049135i   | 0.075336        | 0.078881-0.020315i   | 0.081455        |
| 6     | -0.007729            | 0.007729        | 0.007706             | 0.007706        | -0.00081             | 0.000810        |

| $M_J$ | 13                   |                 |
|-------|----------------------|-----------------|
|       | 279 cm <sup>-1</sup> |                 |
|       | c                    | c               |
| -6    | -0.002292-0.002713i  | 0.003552        |
| -5    | -0.024821+0.010765i  | 0.027055        |
| -4    | -0.615552+0.218139i  | <b>0.653061</b> |
| -3    | -0.119831+0.080263i  | 0.144228        |
| -2    | -0.034616+0.013976i  | 0.037331        |
| -1    | -0.003674+0.033775i  | 0.033974        |
| 0     | -0.285146-0.132389i  | 0.314380        |
| 1     | -0.02343+0.024603i   | 0.033975        |
| 2     | -0.011663-0.035463i  | 0.037332        |
| 3     | 0.016017+0.143335i   | 0.144227        |
| 4     | -0.230597-0.610994i  | <b>0.653061</b> |
| 5     | 0.007794+0.025907i   | 0.027054        |
| 6     | -0.003551            | 0.003551        |

**Table S11.** Ab initio ligand-field parameters  $B_n^m$  (in cm<sup>-1</sup>) of the [Dy(TPP)(cyclen)]<sup>+</sup>

| n | m | Experimental Geometry |                | Symmetrized- $C_4$ Geometry |                |
|---|---|-----------------------|----------------|-----------------------------|----------------|
|   |   | Real part             | Imaginary part | Real part                   | Imaginary part |
| 2 | 0 | <b>87.71</b>          | <b>0.00</b>    | <b>37.31</b>                | <b>0.00</b>    |
|   | 1 | <b>82.37</b>          | <b>82.37</b>   | 0.00                        | 0.00           |
|   | 2 | <b>11.66</b>          | <b>19.99</b>   | 0.00                        | 0.00           |
| 4 | 0 | <b>-18.25</b>         | <b>0.00</b>    | <b>-129.00</b>              | <b>0.00</b>    |
|   | 1 | <b>-160.13</b>        | <b>-49.59</b>  | 0.00                        | 0.00           |
|   | 2 | <b>-64.36</b>         | <b>-64.36</b>  | 0.00                        | 0.00           |
|   | 3 | <b>-31.53</b>         | <b>-70.20</b>  | 0.00                        | 0.00           |
| 6 | 4 | <b>-15.52</b>         | <b>55.44</b>   | <b>85.08</b>                | <b>-38.64</b>  |
|   | 0 | <b>-5.19</b>          | <b>0.00</b>    | <b>28.36</b>                | <b>0.00</b>    |
|   | 1 | <b>13.87</b>          | <b>8.97</b>    | 0.00                        | 0.00           |
|   | 2 | <b>24.86</b>          | <b>12.85</b>   | 0.00                        | 0.00           |
|   | 3 | <b>5.32</b>           | <b>5.32</b>    | 0.00                        | 0.00           |
|   | 4 | <b>1.61</b>           | <b>7.33</b>    | <b>-3.79</b>                | <b>-17.19</b>  |
| 6 | 5 | <b>0.48</b>           | <b>2.78</b>    | 0.00                        | 0.00           |
|   | 6 | <b>2.35</b>           | <b>-0.71</b>   | 0.00                        | 0.00           |

**Table S12.** CASSCF/RASSI calculated energies and wave functions of the [Dy(Por)(cyclen)]<sup>+</sup> with an absolute coefficient larger than 0.05.

| Basis Set 2                |                                                 |
|----------------------------|-------------------------------------------------|
| Energy (cm <sup>-1</sup> ) | Wave Function                                   |
| 0.00                       | +11/2>,  +3/2>,  -5/2>,  -11/2>,  -13/2>        |
| 0.00                       | -11/2>,  -3/2>,  +5/2>,  +11/2>,  +13/2>        |
| 15.6                       | -13/2>,  -5/2>,  +11/2>                         |
| 15.6                       | +13/2>,  +5/2>,  -11/2>                         |
| 47.0                       | +9/2>,  -9/2>,  +1/2>,  -7/2>,  -1/2>,  +7/2>   |
| 47.0                       | -9/2>,  +9/2>,  -1/2>,  +7/2>,  +1/2>,  -7/2>   |
| 102.6                      | -7/2>,  +1/2>,  +9/2>,  +7/2>,  -15/2>          |
| 102.6                      | +7/2>,  -1/2>,  -9/2>,  -7/2>,  +15/2>          |
| 131.3                      | -5/2>,  +3/2>,  +5/2>,  -3/2>,  +11/2>,  +13/2> |
| 131.3                      | +5/2>,  -3/2>,  -5/2>,  +3/2>,  -11/2>,  -13/2> |
| 222.5                      | +1/2>,  -7/2>,  -1/2>,  +9/2>,  +7/2>,  -9/2>   |
| 222.5                      | -1/2>,  +7/2>,  +1/2>,  -9/2>,  -7/2>,  +9/2>   |
| 229.3                      | -3/2>,  +5/2>,  -11/2>,  +3/2>,  +13/2>,  -5/2> |
| 229.3                      | +3/2>,  -5/2>,  +11/2>,  -3/2>,  -13/2>,  +5/2> |
| 254.7                      | -15/2>,  -7/2>,  +1/2>                          |
| 254.7                      | +15/2>,  +7/2>,  -1/2>                          |

**Table S13.** Composition of wave functions for [Dy(Por)(cyclen)]<sup>+</sup> as extracted from CASSCF/RASSI/Single\_Aniso calculations with basis set 2.

| $M_J$ | Wave Functions and Energies |                 |                       |                 |                       |                 |
|-------|-----------------------------|-----------------|-----------------------|-----------------|-----------------------|-----------------|
|       | 1                           |                 | 2                     |                 | 3                     |                 |
|       | 0.00 cm <sup>-1</sup>       |                 | 0.00 cm <sup>-1</sup> |                 | 15.6 cm <sup>-1</sup> |                 |
|       | c                           | c               | c                     | c               | c                     | c               |
| -15/2 | 0                           | 0.000000        | 0                     | 0.000000        | 0.000005i             | 0.000005        |
| -13/2 | -0.063054+0.002577i         | 0.063107        | 0.004332-0.002668i    | 0.005088        | 0.680989-0.71187i     | <b>0.985142</b> |
| -11/2 | -0.076729-0.018286i         | 0.078878        | -0.942482+0.267401i   | <b>0.979681</b> | -0.000285+0.000091i   | 0.000299        |
| -9/2  | 0                           | 0.000000        | -0.000006-0.000003i   | 0.000007        | 0                     | 0.000000        |
| -7/2  | 0                           | 0.000000        | 0                     | 0.000000        | 0.000001i             | 0.000001        |
| -5/2  | -0.054931-0.011972i         | 0.056220        | 0.004331-0.001321i    | 0.004528        | 0.128377-0.078729i    | 0.150595        |
| -3/2  | -0.012974-0.002092i         | 0.013142        | -0.153288+0.056056i   | 0.163216        | 0.000112-0.000041i    | 0.000119        |
| -1/2  | 0                           | 0.000000        | -0.000001-0.000001i   | 0.000001        | 0                     | 0.000000        |
| 1/2   | 0.000001-0.000001i          | 0.000001        | 0                     | 0.000000        | 0                     | 0.000000        |
| 3/2   | -0.148543+0.067635i         | 0.163216        | 0.007775-0.010595i    | 0.013142        | 0.010197-0.027661i    | 0.029481        |
| 5/2   | -0.004012+0.002098i         | 0.004527        | -0.030733+0.047077i   | 0.056221        | 0.000313-0.000513i    | 0.000601        |
| 7/2   | 0                           | 0.000000        | 0                     | 0.000000        | 0                     | 0.000000        |
| 9/2   | 0.000002-0.000006i          | 0.000006        | 0                     | 0.000000        | 0                     | 0.000000        |
| 11/2  | -0.859095+0.470885i         | <b>0.979682</b> | 0.041831-0.066872i    | 0.078878        | -0.022862+0.07354i    | 0.077012        |
| 13/2  | -0.004959+0.00114i          | 0.005088        | -0.04673+0.042412i    | 0.063107        | 0.002833-0.002725i    | 0.003931        |
| 15/2  | 0                           | 0.000000        | 0                     | 0.000000        | 0                     | 0.000000        |

  

| $M_J$ | 4                     |          | 5                     |          | 6                     |          |
|-------|-----------------------|----------|-----------------------|----------|-----------------------|----------|
|       | 15.6 cm <sup>-1</sup> |          | 47.0 cm <sup>-1</sup> |          | 47.0 cm <sup>-1</sup> |          |
|       | c                     | c        | c                     | c        | c                     | c        |
| -15/2 | 0                     | 0.000000 | 0.000481-0.002169i    | 0.002222 | 0.002537-0.011441i    | 0.011719 |
| -13/2 | -0.002793+0.002766i   | 0.003931 | 0                     | 0.000000 | 0                     | 0.000000 |
| -11/2 | -0.074074+0.021068i   | 0.077012 | 0.000006-0.000003i    | 0.000007 | -0.000001             | 0.000001 |

|      |                     |                 |                     |                 |                     |                 |
|------|---------------------|-----------------|---------------------|-----------------|---------------------|-----------------|
| -9/2 | 0                   | 0.000000        | -0.880318-0.293192i | <b>0.927858</b> | 0.16686+0.055578i   | 0.175873        |
| -7/2 | 0                   | 0.000000        | 0.022855-0.022336i  | 0.031957        | 0.120596-0.117803i  | 0.168585        |
| -5/2 | -0.000521+0.000301i | 0.000602        | 0                   | 0.000000        | 0.000001            | 0.000001        |
| -3/2 | 0.027901-0.009522i  | 0.029481        | 0.000002-0.000002i  | 0.000003        | 0                   | 0.000000        |
| -1/2 | 0                   | 0.000000        | -0.275194+0.010326i | 0.275388        | 0.052163-0.001954i  | 0.052200        |
| 1/2  | 0                   | 0.000000        | 0.013202-0.050503i  | 0.052200        | 0.069667-0.26643i   | 0.275388        |
| 3/2  | -0.000043+0.000111i | 0.000119        | 0.000001            | 0.000001        | 0.000002-0.000001i  | 0.000002        |
| 5/2  | 0.081826-0.126425i  | 0.150595        | -0.000001i          | 0.000001        | 0                   | 0.000000        |
| 7/2  | 0.000001            | 0.000001        | -0.141121+0.092228i | 0.168586        | 0.026755-0.017476i  | 0.031957        |
| 9/2  | 0                   | 0.000000        | -0.01813-0.174936i  | 0.175873        | -0.095626-0.922917i | <b>0.927858</b> |
| 11/2 | 0.000098-0.000283i  | 0.000299        | 0.000001-0.000001i  | 0.000001        | 0.000004-0.000005i  | 0.000006        |
| 13/2 | 0.728215-0.663482i  | <b>0.985142</b> | 0                   | 0.000000        | 0                   | 0.000000        |
| 15/2 | 0.000005            | 0.000005        | -0.011719           | 0.011719        | 0.002221            | 0.002221        |

| $M_J$ | 7                      |                 | 8                     |                 | 9                      |                 |
|-------|------------------------|-----------------|-----------------------|-----------------|------------------------|-----------------|
|       | 102.6 cm <sup>-1</sup> |                 | 102.6cm <sup>-1</sup> |                 | 131.3 cm <sup>-1</sup> |                 |
|       | c                      | c               | c                     | c               | c                      | c               |
| -15/2 | 0.001028+0.000958i     | 0.001405        | -0.063449-0.059114i   | 0.086719        | 0                      | 0.000000        |
| -13/2 | 0                      | 0.000000        | -0.000001i            | 0.000001        | 0.010354-0.001105i     | 0.010413        |
| -11/2 | 0.000002-0.000001i     | 0.000002        | 0                     | 0.000000        | 0.128168-0.039547i     | 0.134131        |
| -9/2  | -0.247562-0.082779i    | 0.261035        | -0.004005-0.001337i   | 0.004222        | 0.000001               | 0.000001        |
| -7/2  | 0.0034+0.014277i       | 0.014676        | -0.209959-0.881369i   | <b>0.906032</b> | 0                      | 0.000000        |
| -5/2  | 0                      | 0.000000        | 0.000004-0.000007i    | 0.000008        | -0.054376-0.008266i    | 0.055001        |
| -3/2  | -0.000002+0.000002i    | 0.000003        | 0                     | 0.000000        | -0.554749+0.214311i    | 0.594706        |
| -1/2  | 0.321156-0.00654i      | 0.321223        | 0.005206-0.000106i    | 0.005207        | -0.000005-0.000002i    | 0.000005        |
| 1/2   | 0.003737+0.003626i     | 0.005207        | -0.230517-0.22371i    | 0.321223        | 0                      | 0.000000        |
| 3/2   | 0                      | 0.000000        | -0.000003i            | 0.000003        | -0.036827+0.020535i    | 0.042165        |
| 5/2   | -0.000002+0.000007i    | 0.000007        | 0                     | 0.000000        | -0.400536+0.664329i    | <b>0.775733</b> |
| 7/2   | 0.754425-0.501734i     | <b>0.906032</b> | 0.01222-0.008128i     | 0.014676        | -0.000006+0.000002i    | 0.000006        |
| 9/2   | -0.003842-0.001752i    | 0.004223        | 0.237558+0.108191i    | 0.261035        | 0                      | 0.000000        |
| 11/2  | 0                      | 0.000000        | 0.000001+0.000002i    | 0.000002        | 0.007964-0.005197i     | 0.009510        |
| 13/2  | 0                      | 0.000000        | 0                     | 0.000000        | 0.105328-0.102348i     | 0.146864        |
| 15/2  | 0.086719               | 0.086719        | 0.001405              | 0.001405        | 0.000001               | 0.000001        |

| $M_J$ | 10                     |                 | 11                     |                 | 12                     |                 |
|-------|------------------------|-----------------|------------------------|-----------------|------------------------|-----------------|
|       | 131.3 cm <sup>-1</sup> |                 | 222.5 cm <sup>-1</sup> |                 | 222.5 cm <sup>-1</sup> |                 |
|       | c                      | c               | c                      | c               | c                      | c               |
| -15/2 | -0.000001i             | 0.000001        | -0.161681-0.05805i     | 0.171786        | -0.014625-0.005251i    | 0.015539        |
| -13/2 | -0.138746+0.048154i    | 0.146865        | -0.000001i             | 0.000001        | 0                      | 0.000000        |
| -11/2 | 0.00822-0.004783i      | 0.009510        | 0                      | 0.000000        | -0.000001+0.000001i    | 0.000001        |
| -9/2  | 0                      | 0.000000        | -0.016951-0.005719i    | 0.017890        | 0.187426+0.063231i     | 0.197805        |
| -7/2  | -0.000005+0.000005i    | 0.000007        | -0.20774-0.290129i     | 0.356834        | -0.01879-0.026242i     | 0.032275        |
| -5/2  | 0.773442-0.059575i     | <b>0.775733</b> | -0.000004i             | 0.000004        | 0.000001-0.000003i     | 0.000003        |
| -3/2  | -0.034884+0.023684i    | 0.042164        | -0.000003+0.000003i    | 0.000004        | 0.000006-0.000006i     | 0.000008        |
| -1/2  | 0                      | 0.000000        | 0.080623-0.003299i     | 0.080690        | -0.891395+0.036509i    | <b>0.892142</b> |
| 1/2   | 0.000005i              | 0.000005        | 0.826622+0.33558i      | <b>0.892142</b> | 0.074765+0.030349i     | 0.080690        |
| 3/2   | 0.440593-0.399442i     | 0.594707        | 0.000004+0.000008i     | 0.000009        | 0.000002+0.000004i     | 0.000004        |
| 5/2   | -0.017031+0.052297i    | 0.055000        | -0.000003i             | 0.000003        | -0.000001+0.000003i    | 0.000003        |
| 7/2   | 0                      | 0.000000        | -0.026553+0.018349i    | 0.032276        | 0.29356-0.202863i      | 0.356835        |
| 9/2   | -0.000001i             | 0.000001        | -0.197768-0.003823i    | 0.197805        | -0.017886-0.000345i    | 0.017889        |
| 11/2  | -0.092888+0.096762i    | 0.134131        | -0.000001-0.000001i    | 0.000001        | -0.000001i             | 0.000001        |
| 13/2  | 0.005637-0.008755i     | 0.010413        | 0                      | 0.000000        | -0.000001+0.000001i    | 0.000001        |
| 15/2  | 0                      | 0.000000        | -0.015539              | 0.015539        | 0.171786               | 0.171786        |

| $M_J$ | 13 | 14 | 15 |
|-------|----|----|----|
|-------|----|----|----|

|       | 229.3 cm <sup>-1</sup> |                 | 229.3 cm <sup>-1</sup> |                 | 254.7 cm <sup>-1</sup> |                 |
|-------|------------------------|-----------------|------------------------|-----------------|------------------------|-----------------|
|       | c                      | c               | c                      | c               | c                      | c               |
| -15/2 | 0.000001               | 0.000001        | 0                      | 0.000000        | 0                      | 0.000000        |
| -13/2 | -0.010526-0.008055i    | 0.013254        | 0.004388-0.059985i     | 0.060145        | 0                      | 0.000000        |
| -11/2 | 0.066189-0.071735i     | 0.097606        | -0.021218-0.003533i    | 0.021510        | 0                      | 0.000000        |
| -9/2  | 0.000001               | 0.000001        | 0.000001               | 0.000001        | -0.022091-0.007471i    | 0.023320        |
| -7/2  | 0.000001i              | 0.000001        | -0.000002-0.000005i    | 0.000005        | 0                      | 0.000000        |
| -5/2  | 0.080138+0.103365i     | 0.130792        | -0.192945+0.561265i    | 0.593503        | 0                      | 0.000000        |
| -3/2  | -0.473635+0.603294i    | <b>0.767003</b> | 0.168414+0.014413i     | 0.169030        | -0.000001+0.000001i    | 0.000001        |
| -1/2  | -0.000009+0.000002i    | 0.000009        | -0.000003+0.000001i    | 0.000003        | 0.125555-0.005739i     | 0.125686        |
| 1/2   | -0.000002-0.000002i    | 0.000003        | 0.000007+0.000005i     | 0.000009        | 0.000001+0.000001i     | 0.000001        |
| 3/2   | -0.16369-0.042148i     | 0.169029        | -0.247231-0.726065i    | <b>0.767003</b> | 0                      | 0.000000        |
| 5/2   | 0.003722-0.593492i     | 0.593504        | -0.109836+0.071011i    | 0.130792        | -0.000001i             | 0.000001        |
| 7/2   | 0.000004-0.000004i     | 0.000006        | -0.000001i             | 0.000001        | -0.120267+0.081311i    | 0.145174        |
| 9/2   | 0.000001               | 0.000001        | -0.000001              | 0.000001        | -0.000001              | 0.000001        |
| 11/2  | 0.021191+0.00369i      | 0.021510        | 0.038711+0.0896i       | 0.097605        | 0                      | 0.000000        |
| 13/2  | -0.015715+0.058056i    | 0.060145        | 0.012599-0.004117i     | 0.013255        | -0.000004+0.000003i    | 0.000005        |
| 15/2  | 0                      | 0.000000        | 0.000001               | 0.000001        | 0.981113               | <b>0.981113</b> |

| $M_J$ | 16                     |                 |
|-------|------------------------|-----------------|
|       | 254.7 cm <sup>-1</sup> |                 |
|       | c                      | c               |
| -15/2 | -0.934265-0.299554i    | <b>0.981113</b> |
| -13/2 | -0.000002-0.000004i    | 0.000004        |
| -11/2 | 0                      | 0.000000        |
| -9/2  | -0.000001              | 0.000001        |
| -7/2  | 0.089698+0.114148i     | 0.145174        |
| -5/2  | 0.000001i              | 0.000001        |
| -3/2  | 0                      | 0.000000        |
| -1/2  | 0.000001               | 0.000001        |
| 1/2   | -0.117808-0.043799i    | 0.125686        |
| 3/2   | -0.000001-0.000001i    | 0.000001        |
| 5/2   | 0                      | 0.000000        |
| 7/2   | 0                      | 0.000000        |
| 9/2   | 0.023317-0.00037i      | 0.023320        |
| 11/2  | 0                      | 0.000000        |
| 13/2  | 0                      | 0.000000        |
| 15/2  | 0                      | 0.000000        |

**Table S14.** CASSCF/RASSI calculated energies and wave functions of the [Dy(TPP)(cyclen)]<sup>+</sup> with an absolute coefficient larger than 0.05.

| Basis set 2                |                                                                                                                   |
|----------------------------|-------------------------------------------------------------------------------------------------------------------|
| Energy (cm <sup>-1</sup> ) | Wave Function                                                                                                     |
| 0.00                       | +15/2>,  +13/2>,  +7/2>,  +11/2>,  +5/2>,  +9/2>,  +3/2>                                                          |
| 0.00                       | -15/2>,  -13/2>,  -7/2>,  -11/2>,  -5/2>,  -9/2>,  -3/2>                                                          |
| 16.1                       | +9/2>,  +7/2>,  +11/2>,  +15/2>,  +5/2>,  +13/2>,  +3/2>,  +1/2>                                                  |
| 16.1                       | -9/2>,  -7/2>,  -11/2>,  -15/2>,  -5/2>,  -13/2>,  -5/2>,  -1/2>                                                  |
| 63.4                       | +5/2>,  +11/2>,  +13/2>,  +3/2>,  +7/2>,  +9/2>,  +15/2>,  +1/2>                                                  |
| 63.4                       | -5/2>,  -11/2>,  -13/2>,  -3/2>,  -7/2>,  -9/2>,  -15/2>,  -1/2>                                                  |
| 131.4                      | +3/2>,  -11/2>,  +1/2>,  -3/2>,  +7/2>,  +9/2>,  +13/2>,  -9/2>,  -1/2>,  -11/2>,  -7/2>,  +5/2>,  -5/2>,  +15/2> |

|       |                                                                                                                                                                                                                                       |
|-------|---------------------------------------------------------------------------------------------------------------------------------------------------------------------------------------------------------------------------------------|
| 131.4 | $  -3/2 \rangle,   -11/2 \rangle,   -1/2 \rangle,   +3/2 \rangle,   -7/2 \rangle,   -9/2 \rangle,   -13/2 \rangle,   +9/2 \rangle,   +1/2 \rangle,   +11/2 \rangle,   +7/2 \rangle,   -5/2 \rangle,   +5/2 \rangle,   -15/2 \rangle$  |
| 176.7 | $  -1/2 \rangle,   -9/2 \rangle,   -11/2 \rangle,   -7/2 \rangle,   +5/2 \rangle,   +7/2 \rangle,   -5/2 \rangle,   -3/2 \rangle,   +3/2 \rangle,   +1/2 \rangle,   -13/2 \rangle,   +13/2 \rangle,   -15/2 \rangle,   +11/2 \rangle$ |
| 176.7 | $  +1/2 \rangle,   +9/2 \rangle,   +11/2 \rangle,   +7/2 \rangle,   -5/2 \rangle,   -7/2 \rangle,   +5/2 \rangle,   +3/2 \rangle,   -3/2 \rangle,   -1/2 \rangle,   +13/2 \rangle,   -13/2 \rangle,   +15/2 \rangle,   -11/2 \rangle$ |
| 229.2 | $  +13/2 \rangle,   +15/2 \rangle,   +11/2 \rangle,   +9/2 \rangle,   -15/2 \rangle,   -13/2 \rangle,   +7/2 \rangle,   -11/2 \rangle,   -9/2 \rangle,   +3/2 \rangle$                                                                |
| 229.2 | $  -13/2 \rangle,   -15/2 \rangle,   -11/2 \rangle,   -9/2 \rangle,   +15/2 \rangle,   +13/2 \rangle,   -7/2 \rangle,   +11/2 \rangle,   +9/2 \rangle,   -3/2 \rangle$                                                                |
| 261.6 | $  +3/2 \rangle,   +1/2 \rangle,   +5/2 \rangle,   +9/2 \rangle,   +7/2 \rangle,   -3/2 \rangle,   -7/2 \rangle,   -5/2 \rangle,   +11/2 \rangle,   -1/2 \rangle,   -9/2 \rangle$                                                     |
| 261.6 | $  -3/2 \rangle,   -1/2 \rangle,   -5/2 \rangle,   -9/2 \rangle,   -7/2 \rangle,   +3/2 \rangle,   +7/2 \rangle,   +5/2 \rangle,   -11/2 \rangle,   +1/2 \rangle,   +9/2 \rangle$                                                     |
| 271.6 | $  -5/2 \rangle,   -7/2 \rangle,   -1/2 \rangle,   +7/2 \rangle,   -3/2 \rangle,   +3/2 \rangle,   +5/2 \rangle,   -9/2 \rangle,   +1/2 \rangle,   +9/2 \rangle,   -11/2 \rangle,   +11/2 \rangle,   -13/2 \rangle,   +13/2 \rangle$  |
| 271.6 | $  +5/2 \rangle,   +7/2 \rangle,   +1/2 \rangle,   -7/2 \rangle,   +3/2 \rangle,   -3/2 \rangle,   -5/2 \rangle,   +9/2 \rangle,   -1/2 \rangle,   -9/2 \rangle,   +11/2 \rangle,   -11/2 \rangle,   +13/2 \rangle,   -13/2 \rangle$  |

**Table S15.** Composition of wave functions for [Dy(TPP)(cyclen)]<sup>+</sup> as extracted from CASSCF/RASSI/Single\_Aniso calculations with basis set 2.

| $M_J$ | Wave Functions and Energies |                 |                       |                 |                       |                 |
|-------|-----------------------------|-----------------|-----------------------|-----------------|-----------------------|-----------------|
|       | 1                           |                 | 2                     |                 | 3                     |                 |
|       | 0.00 cm <sup>-1</sup>       |                 | 0.00 cm <sup>-1</sup> |                 | 16.1 cm <sup>-1</sup> |                 |
|       | c                           | c               | c                     | c               | c                     | c               |
| -15/2 | -0.008843-0.00411i          | 0.009751        | -0.604298-0.280873i   | <b>0.666383</b> | -0.003067-0.005734i   | 0.006503        |
| -13/2 | -0.001308+0.004927i         | 0.005098        | 0.423875+0.392457i    | 0.577661        | -0.019448-0.006548i   | 0.020521        |
| -11/2 | 0.004299+0.000183i          | 0.004303        | 0.157483+0.237367i    | 0.284858        | 0.005574+0.005454i    | 0.007798        |
| -9/2  | 0.006761+0.01618i           | 0.017536        | -0.052949-0.063805i   | 0.082914        | 0.015097+0.047188i    | 0.049544        |
| -7/2  | 0.010383+0.004205i          | 0.011202        | 0.04707-0.290656i     | 0.294443        | 0.011263+0.020706i    | 0.023571        |
| -5/2  | -0.008761+0.010446i         | 0.013634        | 0.060033-0.185999i    | 0.195447        | -0.014866+0.029691i   | 0.033205        |
| -3/2  | 0.027823+0.000961i          | 0.027840        | 0.037028-0.067051i    | 0.076596        | 0.03735+0.000241i     | 0.037351        |
| -1/2  | -0.036988-0.001438i         | 0.037016        | 0.008267-0.022103i    | 0.023598        | -0.074532-0.003148i   | 0.074598        |
| 1/2   | -0.00182+0.023528i          | 0.023598        | 0.034148+0.014286i    | 0.037016        | 0.050544+0.026058i    | 0.056866        |
| 3/2   | -0.005317-0.076411i         | 0.076596        | 0.025636+0.010856i    | 0.027840        | -0.017707-0.082438i   | 0.084318        |
| 5/2   | -0.023956+0.193973i         | 0.195447        | 0.003541+0.013166i    | 0.013634        | -0.040927+0.228802i   | 0.232434        |
| 7/2   | 0.079824-0.283416i          | 0.294443        | 0.011188+0.000564i    | 0.011202        | 0.180485-0.458482i    | 0.492728        |
| 9/2   | -0.074909+0.035543i         | 0.082914        | -0.012951+0.011823i   | 0.017536        | -0.378844+0.483642i   | <b>0.614355</b> |
| 11/2  | -0.242859+0.148875i         | 0.284858        | 0.003975+0.001646i    | 0.004302        | 0.342004-0.201874i    | 0.397140        |
| 13/2  | 0.5498-0.177234i            | 0.577661        | -0.00089+0.00502i     | 0.005098        | 0.161796-0.034861i    | 0.165509        |
| 15/2  | 0.666382                    | <b>0.666382</b> | -0.009752             | 0.009752        | -0.344539             | 0.344539        |

| $M_J$ | 4                     |                 | 5                     |          | 6                     |                 |
|-------|-----------------------|-----------------|-----------------------|----------|-----------------------|-----------------|
|       | 16.1 cm <sup>-1</sup> |                 | 63.4 cm <sup>-1</sup> |          | 63.4 cm <sup>-1</sup> |                 |
|       | c                     | c               | c                     | c        | c                     | c               |
| -15/2 | 0.162497+0.303812i    | 0.344539        | -0.000003-0.000001i   | 0.000003 | -0.145727-0.047053i   | 0.153135        |
| -13/2 | 0.045569+0.159112i    | 0.165509        | 0.000906+0.011503i    | 0.011539 | 0.330733+0.245661i    | 0.411987        |
| -11/2 | 0.016709-0.396788i    | 0.397140        | -0.011857-0.042514i   | 0.044136 | -0.289385-0.361689i   | 0.463209        |
| -9/2  | 0.247795-0.562166i    | <b>0.614356</b> | -0.006916+0.047826i   | 0.048323 | -0.076682-0.153918i   | 0.171962        |
| -7/2  | 0.319163-0.375388i    | 0.492728        | 0.023203-0.007662i    | 0.024435 | 0.032305+0.255887i    | 0.257918        |
| -5/2  | 0.182454-0.144i       | 0.232434        | -0.056935+0.019526i   | 0.060190 | -0.174423+0.539798i   | <b>0.567279</b> |
| -3/2  | 0.081044-0.023267i    | 0.084318        | 0.142255-0.02978i     | 0.145339 | -0.153963+0.315188i   | 0.350782        |
| -1/2  | 0.046816+0.032279i    | 0.056865        | -0.035668-0.037305i   | 0.051613 | -0.094217+0.100037i   | 0.137420        |
| 1/2   | 0.037928+0.064237i    | 0.074598        | 0.058922+0.124147i    | 0.137420 | -0.045405+0.024541i   | 0.051613        |
| 3/2   | 0.017828+0.032821i    | 0.037350        | -0.049668-0.347248i   | 0.350782 | -0.126223-0.07205i    | 0.145339        |

|      |                     |          |                     |                 |                     |          |
|------|---------------------|----------|---------------------|-----------------|---------------------|----------|
| 5/2  | -0.01917+0.027112i  | 0.033205 | 0.000124+0.567279i  | <b>0.567279</b> | -0.048181-0.036076i | 0.060190 |
| 7/2  | 0.02357+0.000166i   | 0.023571 | 0.109367-0.233582i  | 0.257918        | -0.019726-0.014421i | 0.024435 |
| 9/2  | -0.048731+0.008943i | 0.049545 | 0.120266-0.122911i  | 0.171962        | 0.008114-0.047638i  | 0.048324 |
| 11/2 | 0.007438+0.002342i  | 0.007798 | -0.38652+0.255273i  | 0.463208        | 0.024347-0.036814i  | 0.044137 |
| 13/2 | 0.014946+0.014061i  | 0.020521 | -0.390217+0.132154i | 0.411988        | 0.004396-0.010669i  | 0.011539 |
| 15/2 | -0.006502           | 0.006502 | -0.153135           | 0.153135        | 0.000003            | 0.000003 |

| $M_J$ | 7                      |                 | 8                      |                 | 9                      |                 |
|-------|------------------------|-----------------|------------------------|-----------------|------------------------|-----------------|
|       | 131.4 cm <sup>-1</sup> |                 | 131.4 cm <sup>-1</sup> |                 | 176.7 cm <sup>-1</sup> |                 |
|       | c                      | c               | c                      | c               | c                      | c               |
| -15/2 | -0.005614-0.01279i     | 0.013968        | -0.032834-0.074808i    | 0.081696        | 0.062113-0.006262i     | 0.062428        |
| -13/2 | -0.01016-0.004452i     | 0.011093        | -0.133896+0.162956i    | 0.210909        | 0.026734+0.070673i     | 0.075560        |
| -11/2 | 0.097981+0.0533i       | 0.111540        | 0.31214-0.374287i      | 0.487362        | -0.078056-0.287573i    | 0.297978        |
| -9/2  | -0.063262-0.163382i    | 0.175202        | -0.234182+0.130135i    | 0.267911        | -0.052319+0.466623i    | 0.469547        |
| -7/2  | -0.064188+0.085119i    | 0.106608        | -0.267746+0.053945i    | 0.273126        | 0.07543-0.282062i      | 0.291974        |
| -5/2  | 0.09275-0.007696i      | 0.093069        | 0.101618-0.007439i     | 0.101890        | 0.056637-0.128355i     | 0.140295        |
| -3/2  | -0.154755+0.233358i    | 0.280009        | 0.462587+0.189451i     | <b>0.499878</b> | 0.118713+0.044071i     | 0.126629        |
| -1/2  | 0.042423+0.151441i     | 0.157271        | 0.303517+0.214342i     | 0.371571        | -0.664412+0.093067i    | <b>0.670898</b> |
| 1/2   | -0.318253-0.191781i    | 0.371571        | 0.155722-0.022018i     | 0.157271        | -0.056649+0.102383i    | 0.117010        |
| 3/2   | 0.359391+0.347443i     | <b>0.499879</b> | -0.151486+0.235493i    | 0.280009        | 0.040531+0.117443i     | 0.124240        |
| 5/2   | -0.034029-0.09604i     | 0.101890        | 0.030229+0.088023i     | 0.093069        | -0.08184-0.204322i     | 0.220103        |
| 7/2   | -0.058211-0.266851i    | 0.273126        | -0.052145+0.092986i    | 0.106609        | -0.077754-0.129007i    | 0.150627        |
| 9/2   | -0.025045+0.266738i    | 0.267911        | -0.175031+0.007736i    | 0.175202        | -0.007329-0.044282i    | 0.044884        |
| 11/2  | -0.217279+0.436247i    | 0.487362        | -0.088184-0.068299i    | 0.111540        | -0.044583+0.038262i    | 0.058751        |
| 13/2  | -0.095403+0.188098i    | 0.210909        | -0.00816-0.007515i     | 0.011093        | -0.054812+0.036141i    | 0.065655        |
| 15/2  | -0.081697              | 0.081697        | 0.013968               | 0.013968        | 0.004339               | 0.004339        |

| $M_J$ | 10                     |                 | 11                     |                 | 12                     |                 |
|-------|------------------------|-----------------|------------------------|-----------------|------------------------|-----------------|
|       | 176.7 cm <sup>-1</sup> |                 | 229.2 cm <sup>-1</sup> |                 | 229.2 cm <sup>-1</sup> |                 |
|       | c                      | c               | c                      | c               | c                      | c               |
| -15/2 | 0.004317-0.000435i     | 0.004339        | -0.164758-0.008483i    | 0.164976        | -0.610432-0.03143i     | 0.611241        |
| -13/2 | 0.058161+0.030461i     | 0.065655        | -0.143993-0.063586i    | 0.157408        | -0.565845-0.234104i    | <b>0.612360</b> |
| -11/2 | -0.048196-0.033597i    | 0.058750        | -0.078334-0.040528i    | 0.088197        | -0.299513-0.198078i    | 0.359086        |
| -9/2  | 0.00285-0.044794i      | 0.044885        | -0.030588-0.081384i    | 0.086942        | -0.101594-0.160812i    | 0.190215        |
| -7/2  | -0.064421+0.136155i    | 0.150626        | -0.012171+0.022336i    | 0.025437        | -0.022738-0.093832i    | 0.096548        |
| -5/2  | 0.060933-0.211501i     | 0.220103        | 0.013864-0.030854i     | 0.033826        | 0.027389-0.027187i     | 0.038591        |
| -3/2  | 0.028547-0.120916i     | 0.124240        | 0.006162+0.000148i     | 0.006164        | -0.052851-0.023689i    | 0.057917        |
| -1/2  | 0.066632+0.096185i     | 0.117010        | -0.027517+0.026093i    | 0.037921        | -0.038799+0.002314i    | 0.038868        |
| 1/2   | -0.670396-0.025954i    | <b>0.670898</b> | -0.038629-0.004306i    | 0.038868        | 0.026139+0.027473i     | 0.037921        |
| 3/2   | -0.113694+0.055757i    | 0.126630        | 0.053999-0.02094i      | 0.057917        | 0.006161+0.000169i     | 0.006163        |
| 5/2   | 0.069226+0.122027i     | 0.140296        | 0.025955+0.02856i      | 0.038592        | -0.012259-0.031526i    | 0.033826        |
| 7/2   | -0.103342-0.273073i    | 0.291973        | 0.027533-0.092539i     | 0.096548        | -0.011006-0.022932i    | 0.025436        |
| 9/2   | -0.09886-0.459022i     | 0.469547        | -0.109729+0.155375i    | 0.190215        | 0.034732-0.079703i     | 0.086942        |
| 11/2  | 0.048817-0.293952i     | 0.297978        | 0.309302-0.182415i     | 0.359086        | -0.080314+0.036446i    | 0.088197        |
| 13/2  | 0.01951-0.072998i      | 0.075560        | -0.577134+0.204699i    | <b>0.612360</b> | 0.147072-0.056098i     | 0.157408        |
| 15/2  | -0.062428              | 0.062428        | 0.611241               | 0.611241        | -0.164976              | 0.164976        |

| $M_J$ | 13                     |          | 14                     |          | 15                     |          |
|-------|------------------------|----------|------------------------|----------|------------------------|----------|
|       | 261.6 cm <sup>-1</sup> |          | 261.6 cm <sup>-1</sup> |          | 271.6 cm <sup>-1</sup> |          |
|       | c                      | c        | c                      | c        | c                      | c        |
| -15/2 | -0.010881-0.009202i    | 0.014250 | 0.008802+0.007444i     | 0.011528 | 0.036002+0.019742i     | 0.041060 |
| -13/2 | -0.043646-0.004096i    | 0.043838 | -0.000968+0.046853i    | 0.046863 | -0.061756+0.04371i     | 0.075660 |
| -11/2 | -0.000635+0.042748i    | 0.042753 | 0.193792+0.039836i     | 0.197844 | 0.123269-0.054295i     | 0.134697 |
| -9/2  | 0.121375-0.037549i     | 0.127050 | -0.16722-0.296101i     | 0.340056 | -0.103312+0.199887i    | 0.225007 |
| -7/2  | -0.15047-0.177241i     | 0.232499 | -0.158771+0.297182i    | 0.336935 | 0.001707-0.350998i     | 0.351002 |

|      |                     |                 |                     |                 |                     |                 |
|------|---------------------|-----------------|---------------------|-----------------|---------------------|-----------------|
| -5/2 | 0.047168+0.204117i  | 0.209496        | 0.285678+0.234088i  | 0.369336        | 0.092399+0.477593i  | <b>0.486449</b> |
| -3/2 | 0.220556+0.105965i  | 0.244691        | 0.053045-0.475887i  | <b>0.478834</b> | -0.157586-0.276569i | 0.318314        |
| -1/2 | -0.176242-0.062674i | 0.187054        | -0.386595+0.036299i | 0.388295        | 0.300569+0.174515i  | 0.347559        |
| 1/2  | -0.27175-0.277355i  | 0.388296        | 0.175042+0.065951i  | 0.187054        | -0.012837+0.177362i | 0.177826        |
| 3/2  | 0.266794-0.397621i  | <b>0.478833</b> | 0.236833+0.06151i   | 0.244690        | 0.293729-0.027909i  | 0.295052        |
| 5/2  | 0.369291+0.005732i  | 0.369335        | -0.167821+0.125397i | 0.209495        | 0.210273-0.17352i   | 0.272624        |
| 7/2  | -0.07067+0.32944i   | 0.336935        | -0.229344+0.03817i  | 0.232499        | 0.22029-0.244013i   | 0.328740        |
| 9/2  | -0.318886+0.118111i | 0.340057        | -0.068431-0.107047i | 0.127051        | 0.087232-0.149346i  | 0.172956        |
| 11/2 | -0.173696-0.094721i | 0.197844        | 0.027119-0.03305i   | 0.042752        | 0.013536-0.079518i  | 0.080662        |
| 13/2 | 0.029515-0.036401i  | 0.046863        | 0.035972+0.025057i  | 0.043839        | -0.044076-0.04927i  | 0.066108        |
| 15/2 | -0.011528           | 0.011528        | -0.01425            | 0.014250        | 0                   | 0.000000        |

| $M_J$ | 16                     |                 |
|-------|------------------------|-----------------|
|       | 271.6 cm <sup>-1</sup> |                 |
|       | c                      | c               |
| -15/2 | 0                      | 0.000000        |
| -13/2 | 0.062336-0.022009i     | 0.066107        |
| -11/2 | -0.026365+0.076232i    | 0.080662        |
| -9/2  | -0.00468-0.172892i     | 0.172955        |
| -7/2  | 0.075832+0.319875i     | 0.328741        |
| -5/2  | -0.100943-0.253248i    | 0.272624        |
| -3/2  | 0.24413+0.165699i      | 0.295052        |
| -1/2  | -0.074021+0.161688i    | 0.177826        |
| 1/2   | 0.347455-0.008503i     | 0.347559        |
| 3/2   | 0.271153-0.166734i     | 0.318315        |
| 5/2   | 0.310648-0.374339i     | <b>0.486448</b> |
| 7/2   | 0.167266-0.308585i     | 0.351002        |
| 9/2   | 0.005521-0.224939i     | 0.225007        |
| 11/2  | -0.08198-0.106876i     | 0.134697        |
| 13/2  | -0.033133-0.068019i    | 0.075660        |
| 15/2  | -0.041059              | 0.041059        |

**Table S16.** Ab initio ligand-field parameters  $B_n^m$  (in cm<sup>-1</sup>) of the [Ho(TPP)(cyclen)]<sup>+</sup>

| n | m | Experimental Geometry |                | Symmetrized- $C_4$ Geometry |                |
|---|---|-----------------------|----------------|-----------------------------|----------------|
|   |   | Real part             | Imaginary part | Real part                   | Imaginary part |
| 2 | 0 | <b>30.71</b>          | <b>0.00</b>    | <b>53.87</b>                | <b>0.00</b>    |
|   | 1 | <b>-52.22</b>         | <b>-52.22</b>  | 0.00                        | 0.00           |
|   | 2 | <b>31.89</b>          | <b>-25.01</b>  | 0.00                        | 0.00           |
| 4 | 0 | <b>38.05</b>          | <b>0.00</b>    | <b>-111.81</b>              | <b>0.00</b>    |
|   | 1 | <b>17.14</b>          | <b>9.37</b>    | 0.00                        | 0.00           |
|   | 2 | <b>-13.16</b>         | <b>-13.16</b>  | 0.00                        | 0.00           |
|   | 3 | <b>18.54</b>          | <b>-74.94</b>  | 0.00                        | 0.00           |
|   | 4 | <b>51.12</b>          | <b>2.28</b>    | <b>43.31</b>                | <b>-46.09</b>  |
| 6 | 0 | <b>-0.53</b>          | <b>0.00</b>    | <b>26.06</b>                | <b>0.00</b>    |
|   | 1 | <b>14.04</b>          | <b>-10.45</b>  | 0.00                        | 0.00           |
|   | 2 | <b>1.04</b>           | <b>2.04</b>    | 0.00                        | 0.00           |
|   | 3 | <b>4.03</b>           | <b>4.03</b>    | 0.00                        | 0.00           |
|   | 4 | <b>-12.71</b>         | <b>-9.29</b>   | <b>1.32</b>                 | <b>6.72</b>    |
|   | 5 | <b>11.90</b>          | <b>0.84</b>    | 0.00                        | 0.00           |
|   | 6 | <b>-6.30</b>          | <b>0.72</b>    | 0.00                        | 0.00           |



**Table S17.** CASSCF/RASSI calculated energies and wave functions of the [Ho(PPP)(cyclen)]<sup>+</sup> with an absolute coefficient larger than 0.05.

| Basis set 2                |                                                    |
|----------------------------|----------------------------------------------------|
| Energy (cm <sup>-1</sup> ) | Wave Function                                      |
| 0.00                       | ±8>,  ±2>,  ±7>,  ±6>,  ±5>,  ±4>,  ±3>,  ±1>,  0> |
| 1.90                       | ±8>,  ±6>,  ±7>,  ±4>,  0>,  ±1>,  ±5>,  ±2>,  ±3> |
| 5.24                       | ±1>,  ±2>,  ±6>,  ±5>,  ±4>,  0>,  ±8>,  ±3>,  ±7> |
| 7.71                       | 0>,  ±3>,  ±1>,  ±5>,  ±7>,  ±2>,  ±8>,  ±6>,  ±4> |
| 45.2                       | ±4>,  ±7>,  ±5>,  ±1>,  ±2>,  ±6>,  0>,  ±8>       |
| 50.5                       | ±3>,  ±7>,  ±2>,  ±5>,  0>,  ±6>,  ±1>,  ±8>       |
| 55.5                       | 0>,  ±8>,  ±2>,  ±4>,  ±5>,  ±1>,  ±7>,  ±6>,  ±3> |
| 57.7                       | ±1>,  ±8>,  ±2>,  ±5>,  ±6>,  ±4>,  0>,  ±7>       |
| 102                        | ±4>,  ±3>,  ±7>,  ±2>,  ±1>,  ±6>,  ±5>,  ±8>,  0> |
| 107                        | ±6>,  ±7>,  ±5>,  ±4>,  ±8>,  ±3>,  ±2>,  ±1>      |
| 107                        | ±6>,  ±5>,  ±7>,  ±4>,  ±8>,  ±3>,  ±2>            |
| 130                        | ±3>,  ±7>,  ±8>,  ±2>,  ±4>,  ±1>,  0>,  ±5>,  ±6> |
| 130                        | ±2>,  ±4>,  ±7>,  ±8>,  ±3>,  ±1>,  ±6>,  0>,  ±5> |
| 146                        | 0>,  ±6>,  ±3>,  ±2>,  ±7>,  ±4>,  ±5>,  ±8>       |
| 182                        | ±1>,  ±5>,  ±4>,  ±6>,  ±3>,  ±7>,  ±2>,  ±8>      |
| 185                        | ±6>,  ±5>,  ±1>,  ±4>,  ±3>,  ±7>,  ±8>            |
| 204                        | ±5>,  0>,  ±2>,  ±6>,  ±4>,  ±7>,  ±3>,  ±8>       |

**Table S18.** Composition of wave functions for [Ho(PPP)(cyclen)]<sup>+</sup> as extracted from CASSCF/RASSI/Single\_Aniso calculations with basis set 2.

| $M_J$ | Wave Functions and Energies |                 |                       |                 |                       |                 |
|-------|-----------------------------|-----------------|-----------------------|-----------------|-----------------------|-----------------|
|       | 1                           |                 | 2                     |                 | 3                     |                 |
|       | 0.00 cm <sup>-1</sup>       |                 | 1.90 cm <sup>-1</sup> |                 | 5.24 cm <sup>-1</sup> |                 |
|       | c                           | c               | c                     | c               | c                     | c               |
| -8    | 0.403427-0.053455i          | <b>0.406953</b> | 0.453274-0.059311i    | <b>0.457138</b> | -0.146653+0.049116i   | 0.154659        |
| -7    | 0.213395-0.178748i          | 0.278367        | 0.205133-0.145943i    | 0.251752        | 0.067851-0.021742i    | 0.071249        |
| -6    | -0.014076+0.236542i         | 0.236960        | 0.003611+0.291761i    | 0.291783        | -0.011873-0.203637i   | 0.203983        |
| -5    | 0.145251+0.173471i          | 0.226252        | 0.069253+0.119019i    | 0.137701        | 0.124482+0.145095i    | 0.191176        |
| -4    | -0.169483-0.042815i         | 0.174807        | -0.196579-0.119616i   | 0.230111        | 0.185551+0.04429i     | 0.190764        |
| -3    | 0.048481+0.125665i          | 0.134693        | 0.069789-0.010979i    | 0.070647        | -0.092158+0.026652i   | 0.095934        |
| -2    | 0.281873-0.070541i          | 0.290566        | 0.110107-0.042415i    | 0.117994        | 0.32735-0.092667i     | 0.340213        |
| -1    | 0.054725+0.090396i          | 0.105671        | 0.013999+0.160333i    | 0.160943        | 0.211401-0.414083i    | <b>0.464925</b> |
| 0     | 0.102405-0.006755i          | 0.102628        | -0.014761-0.226582i   | 0.227062        | 0.172942-0.028191i    | 0.175225        |
| 1     | -0.042377+0.096801i         | 0.105670        | -0.006921-0.160794i   | 0.160943        | -0.33196-0.325511i    | <b>0.464925</b> |
| 2     | 0.288697+0.032905i          | 0.290566        | -0.11468-0.027771i    | 0.117995        | 0.339833-0.016089i    | 0.340214        |
| 3     | -0.031555+0.130944i         | 0.134692        | 0.070624+0.001832i    | 0.070648        | 0.095851-0.003995i    | 0.095934        |
| 4     | -0.162391+0.064707i         | 0.174808        | 0.179398-0.14411i     | 0.230112        | 0.16188-0.100925i     | 0.190764        |
| 5     | -0.121206+0.191047i         | 0.226252        | 0.053226-0.126998i    | 0.137701        | -0.071959+0.177117i   | 0.191177        |
| 6     | -0.045025-0.232643i         | 0.236960        | 0.034274+0.289764i    | 0.291784        | 0.053412+0.196866i    | 0.203983        |
| 7     | -0.235025-0.149169i         | 0.278367        | 0.222335+0.118094i    | 0.251752        | -0.071243+0.000932i   | 0.071249        |
| 8     | 0.406953                    | <b>0.406953</b> | -0.457138             | <b>0.457138</b> | -0.15466              | 0.154660        |

  

| $M_J$ | 4                     |   | 5                     |   | 6                     |   |
|-------|-----------------------|---|-----------------------|---|-----------------------|---|
|       | 7.71 cm <sup>-1</sup> |   | 45.2 cm <sup>-1</sup> |   | 50.5 cm <sup>-1</sup> |   |
|       | c                     | c | c                     | c | c                     | c |
|       |                       |   |                       |   |                       |   |

|    |                     |                 |                     |                 |                     |                 |
|----|---------------------|-----------------|---------------------|-----------------|---------------------|-----------------|
| -8 | 0.103834+0.054282i  | 0.117167        | 0.027353-0.096774i  | 0.100565        | -0.007465+0.080601i | 0.080946        |
| -7 | 0.118745+0.1321i    | 0.177625        | -0.228925-0.218452i | 0.316430        | 0.251952+0.118563i  | 0.278455        |
| -6 | 0.076465+0.057468i  | 0.095653        | -0.182753+0.027748i | 0.184848        | 0.133804-0.094729i  | 0.163942        |
| -5 | -0.180947+0.062136i | 0.191318        | 0.169237-0.248834i  | 0.300931        | -0.139592+0.156355i | 0.209602        |
| -4 | 0.035486-0.080153i  | 0.087657        | -0.020893-0.339419i | <b>0.340061</b> | 0.001188-0.027034i  | 0.027060        |
| -3 | 0.205049-0.313901i  | 0.374939        | -0.005653-0.037888i | 0.038307        | -0.259227-0.411287i | <b>0.486164</b> |
| -2 | 0.114449-0.115416i  | 0.162541        | -0.249671-0.058806i | 0.256503        | -0.210216-0.166476i | 0.268151        |
| -1 | -0.094933-0.269629i | 0.285853        | -0.275999-0.029709i | 0.277593        | -0.018196+0.143392i | 0.144542        |
| 0  | -0.536459-0.131765i | <b>0.552404</b> | 0.080296-0.060747i  | 0.100686        | -0.117526-0.128914i | 0.174445        |
| 1  | 0.209047-0.194965i  | 0.285853        | 0.04648-0.273675i   | 0.277594        | -0.144459+0.004894i | 0.144542        |
| 2  | 0.047954+0.155305i  | 0.162540        | -0.011319+0.256253i | 0.256503        | -0.14638-0.224674i  | 0.268152        |
| 3  | -0.036289-0.373178i | 0.374938        | -0.034922-0.015745i | 0.038307        | 0.385627+0.296053i  | <b>0.486164</b> |
| 4  | -0.005686+0.087473i | 0.087658        | 0.320941+0.112424i  | <b>0.340062</b> | -0.027028-0.00131i  | 0.027060        |
| 5  | 0.131569+0.138896i  | 0.191318        | -0.285484+0.095177i | 0.300932        | -0.168562+0.124578i | 0.209602        |
| 6  | 0.094388-0.015503i  | 0.095653        | -0.076409+0.168316i | 0.184848        | -0.106665+0.124498i | 0.163943        |
| 7  | -0.166434+0.062054i | 0.177626        | -0.147951-0.279711i | 0.316430        | -0.094822-0.261812i | 0.278454        |
| 8  | 0.117167            | 0.117167        | 0.100565            | 0.100565        | 0.080946            | 0.080946        |

| $M_J$ | 7                     |                 | 8                     |                 | 9                    |                 |
|-------|-----------------------|-----------------|-----------------------|-----------------|----------------------|-----------------|
|       | 55.5 cm <sup>-1</sup> |                 | 57.7 cm <sup>-1</sup> |                 | 102 cm <sup>-1</sup> |                 |
|       | c                     | c               | c                     | c               | c                    | c               |
| -8    | 0.012776+0.363407i    | 0.363632        | -0.066527-0.366012i   | 0.372009        | 0.153318+0.064558i   | 0.166355        |
| -7    | -0.151218+0.038815i   | 0.156120        | 0.126574+0.008545i    | 0.126862        | 0.017257-0.260336i   | 0.260907        |
| -6    | -0.136244+0.07596i    | 0.155988        | 0.136255-0.054314i    | 0.146681        | -0.060222-0.178568i  | 0.188450        |
| -5    | 0.129539-0.117189i    | 0.174681        | -0.187981+0.120164i   | 0.223106        | 0.103824-0.14496i    | 0.178305        |
| -4    | -0.182696+0.152559i   | 0.238017        | 0.099924-0.104358i    | 0.144483        | 0.364277-0.158311i   | <b>0.397190</b> |
| -3    | 0.048596+0.081485i    | 0.094876        | 0.010588-0.034369i    | 0.035963        | 0.055262-0.291249i   | 0.296445        |
| -2    | -0.084612-0.307874i   | 0.319289        | 0.142684+0.199995i    | 0.245676        | -0.2094+0.094308i    | 0.229657        |
| -1    | 0.140839+0.083731i    | 0.163849        | -0.421908-0.05953i    | <b>0.426087</b> | 0.169502+0.085215i   | 0.189717        |
| 0     | -0.301332+0.312112i   | <b>0.433837</b> | 0.109376+0.091288i    | 0.142466        | 0.014199-0.070311i   | 0.071730        |
| 1     | 0.088627+0.13781i     | 0.163849        | 0.134022+0.404461i    | <b>0.426088</b> | 0.189287-0.012758i   | 0.189716        |
| 2     | 0.310657+0.073743i    | 0.319290        | 0.222288+0.104618i    | 0.245676        | 0.156391+0.168179i   | 0.229657        |
| 3     | 0.083142+0.045703i    | 0.094875        | 0.031921-0.016564i    | 0.035963        | -0.062095+0.289869i  | 0.296445        |
| 4     | -0.146045+0.187943i   | 0.238016        | -0.084806+0.116976i   | 0.144483        | -0.274292-0.28727i   | <b>0.397190</b> |
| 5     | -0.112565+0.133576i   | 0.174681        | -0.08461+0.20644i     | 0.223106        | 0.039432+0.173891i   | 0.178306        |
| 6     | -0.071126+0.138828i   | 0.155988        | -0.029072+0.143771i   | 0.146681        | 0.124799-0.141203i   | 0.188449        |
| 7     | 0.033478-0.152488i    | 0.156120        | -0.031043-0.123005i   | 0.126862        | -0.085125+0.246631i  | 0.260908        |
| 8     | -0.363631             | 0.363631        | -0.372009             | 0.372009        | -0.166356            | 0.166356        |

| $M_J$ | 10                   |                 | 11                   |                 | 12                   |                 |
|-------|----------------------|-----------------|----------------------|-----------------|----------------------|-----------------|
|       | 107 cm <sup>-1</sup> |                 | 107 cm <sup>-1</sup> |                 | 130 cm <sup>-1</sup> |                 |
|       | c                    | c               | c                    | c               | c                    | c               |
| -8    | 0.142519+0.14418i    | 0.202730        | 0.118096+0.163798i   | 0.201932        | 0.105488-0.261305i   | 0.281794        |
| -7    | -0.324292-0.05935i   | 0.329678        | -0.298382-0.07728i   | 0.308227        | -0.028385+0.326094i  | 0.327327        |
| -6    | 0.323203-0.17152i    | <b>0.365895</b> | 0.350658-0.141721i   | <b>0.378214</b> | -0.096706-0.022759i  | 0.099348        |
| -5    | -0.136547+0.293684i  | 0.323876        | -0.154676+0.306082i  | 0.342944        | -0.100878-0.025142i  | 0.103964        |
| -4    | -0.020371-0.259792i  | 0.260589        | -0.010855-0.218199i  | 0.218469        | 0.216187-0.131934i   | 0.253265        |
| -3    | 0.11764+0.130827i    | 0.175940        | 0.104811+0.168404i   | 0.198356        | -0.178596+0.280491i  | <b>0.332523</b> |
| -2    | -0.076387-0.058645i  | 0.096303        | -0.105326-0.048424i  | 0.115924        | 0.061145-0.264741i   | 0.271710        |
| -1    | 0.02941-0.043512i    | 0.052519        | 0.036323+0.021073i   | 0.041993        | 0.139479+0.138726i   | 0.196721        |
| 0     | -0.012707+0.030427i  | 0.032974        | 0.045159+0.023114i   | 0.050731        | -0.058817-0.087174i  | 0.105161        |
| 1     | -0.01027+0.051505i   | 0.052519        | -0.038337-0.01714i   | 0.041994        | -0.076425-0.181269i  | 0.196721        |
| 2     | 0.095408+0.013099i   | 0.096303        | -0.100877-0.057116i  | 0.115924        | -0.268381-0.042405i  | 0.271710        |
| 3     | 0.175744-0.008306i   | 0.175940        | -0.197899+0.01347i   | 0.198357        | -0.326953+0.06061i   | <b>0.332523</b> |
| 4     | 0.199083-0.168145i   | 0.260589        | -0.183342+0.118804i  | 0.218469        | -0.203269+0.151079i  | 0.253265        |

|   |                     |                 |                     |                 |                     |          |
|---|---------------------|-----------------|---------------------|-----------------|---------------------|----------|
| 5 | 0.112873-0.30357i   | 0.323875        | -0.157821+0.304472i | 0.342944        | -0.014449+0.102955i | 0.103964 |
| 6 | -0.105227-0.350438i | <b>0.365895</b> | 0.090118+0.367321i  | <b>0.378214</b> | 0.015097-0.098194i  | 0.099348 |
| 7 | -0.270186-0.188911i | 0.329678        | 0.237189+0.196839i  | 0.308228        | -0.31301-0.09575i   | 0.327328 |
| 8 | -0.20273            | 0.202730        | 0.201932            | 0.201932        | -0.281794           | 0.281794 |

| $M_J$ | 13                   |                 | 14                   |                 | 15                   |                 |
|-------|----------------------|-----------------|----------------------|-----------------|----------------------|-----------------|
|       | 130 cm <sup>-1</sup> |                 | 146 cm <sup>-1</sup> |                 | 182 cm <sup>-1</sup> |                 |
|       | c                    | c               | c                    | c               | c                    | c               |
| -8    | -0.167379+0.223507i  | 0.279233        | 0.010693-0.1238i     | 0.124261        | -0.051637-0.041103i  | 0.065999        |
| -7    | 0.015696-0.28833i    | 0.288757        | -0.148449-0.176172i  | 0.230377        | -0.145818+0.029538i  | 0.148780        |
| -6    | 0.064851+0.115855i   | 0.132771        | -0.319362+0.005842i  | 0.319415        | -0.125665+0.235322i  | 0.266774        |
| -5    | 0.088046+0.068361i   | 0.111469        | -0.081656+0.120913i  | 0.145903        | -0.034602+0.310887i  | 0.312807        |
| -4    | -0.28872+0.080631i   | 0.299768        | 0.191616+0.024516i   | 0.193178        | -0.108805+0.245252i  | 0.268304        |
| -3    | 0.146464-0.221728i   | 0.265735        | 0.28559+0.081383i    | 0.296959        | -0.203523+0.153231i  | 0.254757        |
| -2    | -0.02567+0.32153i    | <b>0.322553</b> | 0.207173+0.189829i   | 0.280991        | -0.105266-0.09048i   | 0.138808        |
| -1    | -0.006308-0.193112i  | 0.193215        | -0.03045-0.007718i   | 0.031413        | -0.1984-0.32965i     | <b>0.384749</b> |
| 0     | 0.10388-0.051987i    | 0.116162        | -0.334015+0.306409i  | <b>0.453269</b> | -0.023318-0.008148i  | 0.024701        |
| 1     | -0.150792-0.120805i  | 0.193215        | -0.005069-0.031001i  | 0.031413        | 0.360528-0.134357i   | <b>0.384750</b> |
| 2     | -0.272749-0.172187i  | <b>0.322553</b> | -0.171298-0.22274i   | 0.280991        | -0.138709+0.005233i  | 0.138808        |
| 3     | -0.265272-0.015675i  | 0.265735        | 0.056505+0.291533i   | 0.296958        | 0.063806+0.246638i   | 0.254758        |
| 4     | -0.237605+0.182768i  | 0.299767        | -0.007936-0.193015i  | 0.193178        | 0.06761-0.259646i    | 0.268304        |
| 5     | 0.001941+0.111452i   | 0.111469        | 0.127491-0.070948i   | 0.145903        | -0.166542+0.264786i  | 0.312806        |
| 6     | -0.053861-0.121355i  | 0.132771        | -0.033302+0.317675i  | 0.319416        | 0.048234-0.262377i   | 0.266774        |
| 7     | -0.240197-0.160269i  | 0.288757        | -0.162744-0.163058i  | 0.230377        | 0.095692+0.113923i   | 0.148780        |
| 8     | -0.279233            | 0.279233        | 0.124261             | 0.124261        | -0.065998            | 0.065998        |

| $M_J$ | 16                   |                 | 17                   |                 |
|-------|----------------------|-----------------|----------------------|-----------------|
|       | 185 cm <sup>-1</sup> |                 | 204 cm <sup>-1</sup> |                 |
|       | c                    | c               | c                    | c               |
| -8    | 0.051444-0.081543i   | 0.096414        | 0.004516+0.066637i   | 0.066790        |
| -7    | -0.094967-0.187107i  | 0.209828        | 0.124718+0.085401i   | 0.151155        |
| -6    | -0.312209-0.109576i  | <b>0.330880</b> | 0.26772-0.082303i    | 0.280085        |
| -5    | -0.245623+0.178979i  | 0.303915        | 0.215316-0.326377i   | <b>0.391002</b> |
| -4    | 0.157585+0.225078i   | 0.274760        | 0.006672-0.257435i   | 0.257521        |
| -3    | 0.266888-0.06218i    | 0.274036        | 0.05514+0.091528i    | 0.106854        |
| -2    | -0.041213-0.012317i  | 0.043014        | 0.275112+0.174358i   | 0.325710        |
| -1    | -0.070602+0.294765i  | 0.303102        | 0.004697+0.035494i   | 0.035803        |
| 0     | -0.015584-0.028257i  | 0.032269        | -0.229026+0.245072i  | 0.335430        |
| 1     | -0.28697-0.097566i   | 0.303102        | 0.035731+0.002286i   | 0.035804        |
| 2     | 0.011573-0.041428i   | 0.043014        | -0.19256-0.262694i   | 0.325711        |
| 3     | 0.194992-0.192545i   | 0.274036        | 0.095047+0.048826i   | 0.106855        |
| 4     | 0.106279+0.253374i   | 0.274761        | 0.256395-0.024062i   | 0.257522        |
| 5     | -0.28243+0.112239i   | 0.303915        | -0.311073+0.23689i   | <b>0.391003</b> |
| 6     | 0.073911-0.322519i   | <b>0.330880</b> | 0.064014-0.272672i   | 0.280085        |
| 7     | 0.107575+0.180154i   | 0.209828        | 0.093638+0.118658i   | 0.151155        |
| 8     | -0.096414            | 0.096414        | -0.06679             | 0.066790        |

**Table S19.** CASSCF/RASSI calculated energies and wave functions of the [Ho(Por)(cyclen)]<sup>+</sup> with an absolute coefficient larger than 0.05.

| Basis set 2                |                 |
|----------------------------|-----------------|
| Energy (cm <sup>-1</sup> ) | Wave Function   |
| 0.00                       | ±4>,  0>,  ±8>  |
| 4.66                       | ±4>,  ±8>       |
| 5.73                       | ±5>,  ±1>,  ±3> |

|      |                                                              |
|------|--------------------------------------------------------------|
| 5.73 | $ \pm 5\rangle,  \pm 1\rangle,  \pm 3\rangle$                |
| 50.4 | $ \pm 3\rangle,  \pm 7\rangle,  \pm 1\rangle,  \pm 5\rangle$ |
| 50.4 | $ \pm 3\rangle,  \pm 7\rangle,  \pm 1\rangle,  \pm 5\rangle$ |
| 66.5 | $ \pm 6\rangle,  \pm 2\rangle$                               |
| 68.5 | $ \pm 6\rangle,  \pm 2\rangle$                               |
| 106  | $ \pm 2\rangle,  \pm 6\rangle$                               |
| 117  | $ \pm 8\rangle,  \pm 4\rangle,  0\rangle$                    |
| 117  | $ \pm 8\rangle,  \pm 4\rangle$                               |
| 149  | $ \pm 7\rangle,  \pm 1\rangle,  \pm 3\rangle$                |
| 149  | $ \pm 7\rangle,  \pm 1\rangle,  \pm 3\rangle$                |
| 160  | $ \pm 2\rangle,  \pm 6\rangle$                               |
| 201  | $ \pm 1\rangle,  \pm 3\rangle,  \pm 7\rangle,  \pm 5\rangle$ |
| 201  | $ \pm 1\rangle,  \pm 3\rangle,  \pm 7\rangle,  \pm 5\rangle$ |
| 224  | $ 0\rangle,  \pm 4\rangle$                                   |

**Table S20.** Composition of wave functions for [Ho(Por)(cyclen)]<sup>+</sup> as extracted from CASSCF/RASSI/Single\_Aniso calculations with basis set 2.

| $M_J$ | Wave Functions and Energies |                 |                            |                 |                            |                 |
|-------|-----------------------------|-----------------|----------------------------|-----------------|----------------------------|-----------------|
|       | 1<br>0.00 cm <sup>-1</sup>  |                 | 2<br>4.66 cm <sup>-1</sup> |                 | 3<br>5.73 cm <sup>-1</sup> |                 |
|       | C                           | c               | c                          | c               | c                          | c               |
| -8    | -0.039958-0.009062i         | 0.040973        | -0.042115-0.009106i        | 0.043088        | 0                          | 0.000000        |
| -7    | 0                           | 0.000000        | 0                          | 0.000000        | 0.001895+0.001334i         | 0.002317        |
| -6    | 0                           | 0.000000        | 0                          | 0.000000        | 0                          | 0.000000        |
| -5    | 0                           | 0.000000        | -0.000001                  | 0.000001        | 0.21366+0.670302i          | <b>0.703531</b> |
| -4    | -0.368729-0.594484i         | <b>0.699552</b> | -0.374996-0.597931i        | <b>0.705793</b> | 0                          | 0.000000        |
| -3    | 0                           | 0.000000        | 0                          | 0.000000        | 0.020016+0.030874i         | 0.036795        |
| -2    | 0                           | 0.000000        | 0                          | 0.000000        | 0                          | 0.000000        |
| -1    | 0                           | 0.000000        | 0                          | 0.000000        | 0.049529+0.035093i         | 0.060701        |
| 0     | -0.132945-0.014886i         | 0.133776        | -0.000038+0.000354i        | 0.000356        | 0                          | 0.000000        |
| 1     | 0                           | 0.000000        | 0                          | 0.000000        | 0.060632-0.002896i         | 0.060701        |
| 2     | 0                           | 0.000000        | 0                          | 0.000000        | 0                          | 0.000000        |
| 3     | 0                           | 0.000000        | 0                          | 0.000000        | 0.033493-0.015234i         | 0.036795        |
| 4     | -0.49108+0.498211i          | <b>0.699553</b> | 0.492888-0.505178i         | <b>0.705793</b> | 0                          | 0.000000        |
| 5     | 0                           | 0.000000        | 0                          | 0.000000        | 0.541018-0.449728i         | <b>0.703531</b> |
| 6     | 0                           | 0.000000        | 0                          | 0.000000        | 0                          | 0.000000        |
| 7     | 0                           | 0.000000        | 0                          | 0.000000        | 0.002315-0.000103i         | 0.002317        |
| 8     | -0.040973                   | 0.040973        | 0.043088                   | 0.043088        | 0                          | 0.000000        |

| $M_J$ | 4<br>5.73 cm <sup>-1</sup> |                 | 5<br>50.4 cm <sup>-1</sup> |                 | 6<br>50.4 cm <sup>-1</sup> |                 |
|-------|----------------------------|-----------------|----------------------------|-----------------|----------------------------|-----------------|
|       | C                          | c               | c                          | c               | c                          | c               |
|       | -8                         | 0               | 0.000000                   | 0               | 0.000000                   | 0               |
| -7    | -0.000908-0.002132i        | 0.002317        | 0.035565-0.051324i         | 0.062442        | -0.029265+0.055159i        | 0.062442        |
| -6    | 0                          | 0.000000        | 0                          | 0.000000        | 0                          | 0.000000        |
| -5    | -0.171781+0.682237i        | <b>0.703531</b> | -0.045706+0.009944i        | 0.046775        | -0.044214+0.015263i        | 0.046774        |
| -4    | 0.000001                   | 0.000001        | 0                          | 0.000000        | 0                          | 0.000000        |
| -3    | -0.000734-0.036787i        | 0.036794        | 0.594375-0.355288i         | <b>0.692468</b> | -0.548334+0.422896i        | <b>0.692467</b> |
| -2    | 0                          | 0.000000        | 0                          | 0.000000        | 0                          | 0.000000        |
| -1    | 0.02359+0.05593i           | 0.060701        | 0.077142-0.09193i          | 0.120008        | 0.065764-0.100385i         | 0.120009        |

|   |                     |                 |                     |                 |                     |                 |
|---|---------------------|-----------------|---------------------|-----------------|---------------------|-----------------|
| 0 | 0                   | 0.000000        | 0                   | 0.000000        | 0                   | 0.000000        |
| 1 | -0.05305-0.029501i  | 0.060701        | 0.000562-0.120007i  | 0.120008        | 0.013592+0.119236i  | 0.120008        |
| 2 | 0                   | 0.000000        | -0.000001           | 0.000001        | 0                   | 0.000000        |
| 3 | 0.036491+0.004709i  | 0.036794        | -0.223858-0.655285i | <b>0.692467</b> | -0.299564-0.624318i | <b>0.692468</b> |
| 4 | 0.000001i           | 0.000001        | 0                   | 0.000000        | 0                   | 0.000000        |
| 5 | -0.696816+0.096975i | <b>0.703532</b> | 0.028447+0.037131i  | 0.046776        | -0.032626-0.033517i | 0.046774        |
| 6 | 0                   | 0.000000        | 0                   | 0.000000        | 0                   | 0.000000        |
| 7 | 0.002022+0.001133i  | 0.002318        | 0.006039-0.062149i  | 0.062442        | -0.001332-0.062428i | 0.062442        |
| 8 | 0                   | 0.000000        | 0                   | 0.000000        | 0                   | 0.000000        |

| $M_J$ | 7<br>66.5 cm <sup>-1</sup> |                 | 8<br>68.5 cm <sup>-1</sup> |                 | 9<br>106 cm <sup>-1</sup> |                 |
|-------|----------------------------|-----------------|----------------------------|-----------------|---------------------------|-----------------|
|       | c                          | c               | c                          | c               | c                         | c               |
|       | -8                         | 0               | 0.000000                   | 0               | 0.000000                  | 0               |
| -7    | 0                          | 0.000000        | 0                          | 0.000000        | 0                         | 0.000000        |
| -6    | -0.433148+0.521527i        | <b>0.677944</b> | 0.383462-0.588788i         | <b>0.702648</b> | -0.074445-0.186675i       | 0.200972        |
| -5    | 0                          | 0.000000        | 0                          | 0.000000        | 0                         | 0.000000        |
| -4    | 0                          | 0.000000        | 0                          | 0.000000        | 0                         | 0.000000        |
| -3    | 0                          | 0.000000        | 0                          | 0.000000        | 0                         | 0.000000        |
| -2    | -0.100436+0.174085i        | 0.200980        | 0.033673-0.071779i         | 0.079285        | 0.355091+0.577513i        | <b>0.677946</b> |
| -1    | 0                          | 0.000000        | 0                          | 0.000000        | 0                         | 0.000000        |
| 0     | 0                          | 0.000000        | 0                          | 0.000000        | 0                         | 0.000000        |
| 1     | 0                          | 0.000000        | 0                          | 0.000000        | -0.000001i                | 0.000001        |
| 2     | 0.110405+0.167939i         | 0.200980        | 0.052667+0.059264i         | 0.079285        | 0.677442-0.026126i        | <b>0.677946</b> |
| 3     | 0                          | 0.000000        | 0                          | 0.000000        | -0.000001i                | 0.000001        |
| 4     | 0                          | 0.000000        | 0                          | 0.000000        | 0                         | 0.000000        |
| 5     | 0                          | 0.000000        | 0                          | 0.000000        | 0                         | 0.000000        |
| 6     | 0.462789+0.495413i         | <b>0.677944</b> | 0.534856+0.455679i         | <b>0.702648</b> | -0.196541+0.041964i       | 0.200971        |
| 7     | 0                          | 0.000000        | 0                          | 0.000000        | 0                         | 0.000000        |
| 8     | 0                          | 0.000000        | 0                          | 0.000000        | 0                         | 0.000000        |

| $M_J$ | 10<br>117 cm <sup>-1</sup> |                   | 11<br>117 cm <sup>-1</sup> |                     | 12<br>149 cm <sup>-1</sup> |                 |
|-------|----------------------------|-------------------|----------------------------|---------------------|----------------------------|-----------------|
|       | c                          | c                 | c                          | c                   | c                          | c               |
|       | -8                         | 0.704764-0.03982i | <b>0.705888</b>            | -0.704665+0.039876i | <b>0.705792</b>            | 0               |
| -7    | 0                          | 0.000000          | 0                          | 0.000000            | 0.495178-0.500493i         | <b>0.704056</b> |
| -6    | 0                          | 0.000000          | 0                          | 0.000000            | 0                          | 0.000000        |
| -5    | 0                          | 0.000000          | 0                          | 0.000000            | 0.003144-0.001138i         | 0.003344        |
| -4    | -0.029631-0.026506i        | 0.039756          | 0.031784+0.029092i         | 0.043088            | 0                          | 0.000000        |
| -3    | 0                          | 0.000000          | 0                          | 0.000000            | -0.053963+0.021376i        | 0.058043        |
| -2    | 0                          | 0.000000          | 0                          | 0.000000            | 0                          | 0.000000        |
| -1    | 0                          | 0.000000          | 0                          | 0.000000            | -0.016279+0.02569i         | 0.030414        |
| 0     | -0.016817+0.000475i        | 0.016824          | 0.000007+0.000263i         | 0.000263            | 0                          | 0.000000        |
| 1     | 0                          | 0.000000          | 0                          | 0.000000            | -0.009302+0.028956i        | 0.030413        |
| 2     | 0                          | 0.000000          | 0                          | 0.000000            | 0                          | 0.000000        |
| 3     | 0                          | 0.000000          | 0                          | 0.000000            | 0.018148+0.055132i         | 0.058042        |
| 4     | -0.028089+0.028135i        | 0.039756          | -0.03009+0.030841i         | 0.043088            | 0                          | 0.000000        |
| 5     | 0                          | 0.000000          | 0                          | 0.000000            | -0.00114-0.003144i         | 0.003344        |
| 6     | 0                          | 0.000000          | 0                          | 0.000000            | 0                          | 0.000000        |
| 7     | 0                          | 0.000000          | 0                          | 0.000000            | 0.067186-0.700843i         | <b>0.704056</b> |
| 8     | 0.705888                   | <b>0.705888</b>   | 0.705793                   | <b>0.705793</b>     | 0                          | 0.000000        |

| $M_J$ | 13<br>149 cm <sup>-1</sup> |   | 14<br>160 cm <sup>-1</sup> |   | 15<br>201 cm <sup>-1</sup> |   |
|-------|----------------------------|---|----------------------------|---|----------------------------|---|
|       | c                          | c | c                          | c | c                          | c |

|    |                     |                 |                     |                 |                     |                 |
|----|---------------------|-----------------|---------------------|-----------------|---------------------|-----------------|
| -8 | 0                   | 0.000000        | 0                   | 0.000000        | 0                   | 0.000000        |
| -7 | -0.494166+0.501493i | <b>0.704056</b> | 0                   | 0.000000        | -0.004072+0.0196i   | 0.020019        |
| -6 | 0                   | 0.000000        | -0.038801-0.069166i | 0.079306        | 0                   | 0.000000        |
| -5 | 0.003142-0.001144i  | 0.003344        | 0                   | 0.000000        | 0.035242-0.040035i  | 0.053337        |
| -4 | 0                   | 0.000000        | 0                   | 0.000000        | 0                   | 0.000000        |
| -3 | 0.05392-0.021485i   | 0.058043        | 0                   | 0.000000        | 0.092954-0.084414i  | 0.125563        |
| -2 | 0                   | 0.000000        | 0.422407+0.561501i  | <b>0.702646</b> | 0                   | 0.000000        |
| -1 | -0.016227+0.025723i | 0.030414        | 0                   | 0.000000        | -0.054021+0.691426i | <b>0.693533</b> |
| 0  | 0                   | 0.000000        | 0                   | 0.000000        | 0.000001            | 0.000001        |
| 1  | 0.009243-0.028974i  | 0.030413        | 0.000001i           | 0.000001        | 0.131881+0.680879i  | <b>0.693534</b> |
| 2  | 0                   | 0.000000        | -0.696281+0.094357i | <b>0.702645</b> | 0                   | 0.000000        |
| 3  | 0.01826+0.055095i   | 0.058042        | 0.000001i           | 0.000001        | -0.101905-0.073358i | 0.125563        |
| 4  | 0                   | 0.000000        | 0                   | 0.000000        | 0                   | 0.000000        |
| 5  | 0.001146+0.003141i  | 0.003344        | 0                   | 0.000000        | -0.039544-0.035792i | 0.053337        |
| 6  | 0                   | 0.000000        | 0.076466-0.021033i  | 0.079306        | 0                   | 0.000000        |
| 7  | 0.065769-0.700977i  | <b>0.704056</b> | 0                   | 0.000000        | 0.006262+0.019013i  | 0.020018        |
| 8  | 0                   | 0.000000        | 0                   | 0.000000        | 0                   | 0.000000        |

| $M_J$ | 16<br>201 cm <sup>-1</sup> |                 | 17<br>224 cm <sup>-1</sup> |                    |
|-------|----------------------------|-----------------|----------------------------|--------------------|
|       | c                          | c               | c                          | c                  |
|       | -8                         | 0               | 0.000000                   | 0.006176-0.002277i |
| -7    | 0.014781-0.013499i         | 0.020018        | 0                          | 0.000000           |
| -6    | 0                          | 0.000000        | 0                          | 0.000000           |
| -5    | 0.052015-0.011801i         | 0.053337        | 0                          | 0.000000           |
| -4    | 0                          | 0.000000        | -0.070936-0.06336i         | 0.095113           |
| -3    | -0.124784+0.01396i         | 0.125562        | 0                          | 0.000000           |
| -2    | 0                          | 0.000000        | 0                          | 0.000000           |
| -1    | -0.448823+0.528721i        | <b>0.693533</b> | -0.000001i                 | 0.000001           |
| 0     | 0                          | 0.000000        | 0.97546-0.174064i          | <b>0.990869</b>    |
| 1     | 0.291979-0.629076i         | <b>0.693533</b> | -0.000001i                 | 0.000001           |
| 2     | -0.000001                  | 0.000001        | 0                          | 0.000000           |
| 3     | -0.039616-0.11915i         | 0.125563        | 0                          | 0.000000           |
| 4     | 0                          | 0.000000        | -0.044643+0.083984i        | 0.095112           |
| 5     | 0.011082+0.052173i         | 0.053337        | 0                          | 0.000000           |
| 6     | 0                          | 0.000000        | 0                          | 0.000000           |
| 7     | -0.006063+0.019078i        | 0.020018        | 0                          | 0.000000           |
| 8     | 0                          | 0.000000        | 0.006582                   | 0.006582           |

**Table S21.** Ab initio ligand-field parameters  $B_n^m$  (in cm<sup>-1</sup>) of the [Er(TPP)(cyclen)]<sup>+</sup>

| n | m | Experimental Geometry |                | Symmetrized-C <sub>4</sub> Geometry |                |
|---|---|-----------------------|----------------|-------------------------------------|----------------|
|   |   | Real part             | Imaginary part | Real part                           | Imaginary part |
| 2 | 0 | <b>71.89</b>          | <b>0.00</b>    | <b>110.05</b>                       | <b>0.00</b>    |
|   | 1 | 7.84                  | 7.84           | 0.18                                | 0.18           |
|   | 2 | -17.38                | -0.67          | -0.32                               | 0.11           |
| 4 | 0 | <b>-113.16</b>        | <b>0.00</b>    | <b>-115.15</b>                      | <b>0.00</b>    |
|   | 1 | -0.21                 | 0.79           | 0.00                                | 0.03           |
|   | 2 | 1.59                  | 1.59           | -0.02                               | -0.02          |
|   | 3 | 6.02                  | 0.70           | -0.01                               | 0.00           |
|   | 4 | <b>-1.60</b>          | <b>-67.79</b>  | <b>-32.38</b>                       | <b>-67.85</b>  |
| 6 | 0 | <b>20.71</b>          | <b>0.00</b>    | <b>18.18</b>                        | <b>0.00</b>    |
|   | 1 | -0.71                 | -0.75          | 0.00                                | 0.00           |
|   | 2 | 0.00                  | -0.23          | 0.00                                | 0.00           |
|   | 3 | 2.24                  | 2.24           | 0.00                                | 0.00           |

|  |   |       |       |       |      |
|--|---|-------|-------|-------|------|
|  | 4 | -5.55 | -0.67 | -6.27 | 0.97 |
|  | 5 | -0.38 | 1.50  | -0.01 | 0.01 |
|  | 6 | 0.49  | 1.16  | 0.00  | 0.00 |

**Table S22.** CASSCF/RASSI calculated energies and wave functions of the [Er(TPP)(cyclen)]<sup>+</sup> with an absolute coefficient larger than 0.05.

| Basis set 2                |                                                                   |
|----------------------------|-------------------------------------------------------------------|
| Energy (cm <sup>-1</sup> ) | Wave Function                                                     |
| 0.00                       | +1/2>,  -1/2>,  -7/2>,  +9/2>                                     |
| 0.00                       | -1/2>,  +1/2>,  +7/2>,  -9/2>                                     |
| 43.0                       | -3/2>,  +3/2>,  +5/2>,  -5/2>,  +13/2>,  -11/2>,  +11/2>,  -13/2> |
| 43.0                       | +3/2>,  -3/2>,  -5/2>,  +5/2>,  -13/2>,  +11/2>,  -11/2>,  +13/2> |
| 83.2                       | +13/2>,  +5/2>,  -3/2>,  +15/2>,  -13/2>                          |
| 83.2                       | -13/2>,  -5/2>,  +3/2>,  -15/2>,  +13/2>                          |
| 91.9                       | -15/2>,  -13/2>,  -7/2>                                           |
| 91.9                       | +15/2>,  +13/2>,  +7/2>                                           |
| 139                        | -5/2>,  +5/2>,  -13/2>,  +3/2>,  +11/2>,  +13/2>,  -3/2>          |
| 139                        | +5/2>,  -5/2>,  +13/2>,  -3/2>,  -11/2>,  -13/2>,  +3/2>          |
| 169                        | -11/2>,  -3/2>,  +11/2>,  +5/2>,  -9/2>                           |
| 169                        | +11/2>,  +3/2>,  -11/2>,  -5/2>,  +9/2>                           |
| 199                        | +7/2>,  -9/2>,  -1/2>,  +9/2>,  +15/2>,  -7/2>                    |
| 199                        | -7/2>,  +9/2>,  +1/2>,  -9/2>,  -15/2>,  +7/2>                    |
| 216                        | -9/2>,  +9/2>,  +7/2>,  -1/2>,  -7/2>,  -11/2>                    |
| 216                        | +9/2>,  -9/2>,  -7/2>,  +1/2>,  +7/2>,  +11/2>                    |

**Table S23.** Composition of wavefunctions for [Er(TPP)(cyclen)]<sup>+</sup> as extracted from CASSCF/RASSI/Single\_Aniso calculations with basis set 2.

| $M_J$ | Wave Functions and Energies |                 |                       |                 |                       |                 |
|-------|-----------------------------|-----------------|-----------------------|-----------------|-----------------------|-----------------|
|       | 1                           |                 | 2                     |                 | 3                     |                 |
|       | 0.00 cm <sup>-1</sup>       |                 | 0.00 cm <sup>-1</sup> |                 | 43.0 cm <sup>-1</sup> |                 |
|       | c                           | c               | c                     | c               | c                     | c               |
| -15/2 | 0.005677-0.014404i          | 0.015482        | 0                     | 0.000000        | 0.000388-0.000113i    | 0.000404        |
| -13/2 | -0.001174+0.002634i         | 0.002884        | -0.011147+0.004822i   | 0.012145        | 0.027938-0.058361i    | 0.064703        |
| -11/2 | -0.003526-0.006563i         | 0.007450        | -0.005384+0.013914i   | 0.014919        | 0.018123+0.098085i    | 0.099745        |
| -9/2  | -0.027447+0.028966i         | 0.039904        | 0.052702-0.066975i    | 0.085224        | -0.003262-0.008331i   | 0.008947        |
| -7/2  | 0.100608-0.041417i          | 0.108800        | 0.040104-0.010595i    | 0.041480        | -0.011742+0.001336i   | 0.011818        |
| -5/2  | -0.002517+0.007309i         | 0.007730        | 0.010926+0.00479i     | 0.011930        | 0.171533+0.078176i    | 0.188507        |
| -3/2  | 0.004215+0.030623i          | 0.030912        | 0.008348+0.014986i    | 0.017154        | -0.576555+0.392956i   | <b>0.697732</b> |
| -1/2  | -0.260842-0.179866i         | 0.316844        | 0.770837+0.529983i    | <b>0.935453</b> | 0.016743-0.022411i    | 0.027975        |
| 1/2   | 0.210413+0.911481i          | <b>0.935452</b> | 0.071691+0.308627i    | 0.316844        | 0.015317-0.008848i    | 0.017689        |
| 3/2   | -0.010881-0.013262i         | 0.017154        | 0.026945+0.015151i    | 0.030913        | -0.414139+0.473369i   | <b>0.628959</b> |
| 5/2   | 0.00045+0.011922i           | 0.011930        | -0.007722-0.000338i   | 0.007729        | -0.075412-0.20354i    | 0.217061        |
| 7/2   | 0.024562-0.033426i          | 0.041480        | -0.075424+0.078413i   | 0.108800        | -0.00155-0.002565i    | 0.002997        |
| 9/2   | -0.081635+0.024472i         | 0.085224        | -0.037013+0.014913i   | 0.039904        | 0.007166+0.004811i    | 0.008631        |
| 11/2  | -0.014919-0.000093i         | 0.014919        | -0.004813-0.005687i   | 0.007450        | -0.088474-0.035066i   | 0.095170        |
| 13/2  | 0.008574-0.008602i          | 0.012145        | -0.002881+0.000127i   | 0.002884        | 0.023403-0.097849i    | 0.100609        |
| 15/2  | 0                           | 0.000000        | -0.015483             | 0.015483        | 0.01473               | 0.014730        |

| $M_J$ | 4 | 5 | 6 |
|-------|---|---|---|
|-------|---|---|---|

|       | 43.0 cm <sup>-1</sup> |                 | 83.2 cm <sup>-1</sup> |                 | 83.2 cm <sup>-1</sup> |                 |
|-------|-----------------------|-----------------|-----------------------|-----------------|-----------------------|-----------------|
|       | c                     | c               | c                     | c               | c                     | c               |
| -15/2 | 0.014144-0.004114i    | 0.014730        | 0.003971-0.005601i    | 0.006866        | -0.06114+0.08624i     | 0.105714        |
| -13/2 | -0.049802-0.087418i   | 0.100609        | -0.068027+0.05601i    | 0.088118        | 0.819673+0.470032i    | <b>0.944878</b> |
| -11/2 | -0.075159+0.058382i   | 0.095170        | -0.019683-0.025634i   | 0.032319        | 0.001587-0.030226i    | 0.030268        |
| -9/2  | -0.005537+0.006621i   | 0.008631        | -0.001796-0.000724i   | 0.001936        | 0.000336+0.010982i    | 0.010987        |
| -7/2  | -0.000772+0.002896i   | 0.002997        | 0.009329-0.004251i    | 0.010252        | -0.038625-0.017535i   | 0.042419        |
| -5/2  | 0.015559-0.216502i    | 0.217060        | -0.032936-0.030491i   | 0.044883        | 0.036749+0.219672i    | 0.222725        |
| -3/2  | -0.529874-0.338854i   | <b>0.628958</b> | 0.078648-0.155084i    | 0.173887        | -0.028093+0.038274i   | 0.047478        |
| -1/2  | -0.017178-0.004217i   | 0.017688        | 0.007791-0.001175i    | 0.007879        | -0.001353+0.007324i   | 0.007448        |
| 1/2   | 0.022337+0.016843i    | 0.027975        | -0.006757-0.003133i   | 0.007448        | -0.005465+0.005676i   | 0.007879        |
| 3/2   | 0.663366+0.216276i    | <b>0.697732</b> | 0.047471-0.000782i    | 0.047477        | 0.172002+0.025532i    | 0.173887        |
| 5/2   | 0.14287-0.122976i     | 0.188507        | -0.157952-0.157027i   | 0.222725        | -0.005826-0.044503i   | 0.044883        |
| 7/2   | 0.011648-0.001997i    | 0.011818        | 0.008034-0.041652i    | 0.042420        | 0.008863-0.005152i    | 0.010252        |
| 9/2   | -0.000805+0.008911i   | 0.008947        | -0.008765-0.006625i   | 0.010987        | 0.000448-0.001884i    | 0.001937        |
| 11/2  | 0.009995+0.099243i    | 0.099745        | -0.025576-0.016187i   | 0.030268        | 0.009528+0.030883i    | 0.032319        |
| 13/2  | 0.043127+0.048235i    | 0.064704        | 0.090612-0.940523i    | <b>0.944878</b> | 0.085036-0.023102i    | 0.088118        |
| 15/2  | -0.000404             | 0.000404        | 0.105714              | 0.105714        | 0.006865              | 0.006865        |

| $M_J$ | 7                     |                 | 8                     |                 | 9                    |                 |
|-------|-----------------------|-----------------|-----------------------|-----------------|----------------------|-----------------|
|       | 91.9 cm <sup>-1</sup> |                 | 91.9 cm <sup>-1</sup> |                 | 139 cm <sup>-1</sup> |                 |
|       | c                     | c               | c                     | c               | c                    | c               |
| -15/2 | -0.157142+0.975388i   | <b>0.987965</b> | 0.001071-0.00665i     | 0.006736        | -0.016302+0.018993i  | 0.025030        |
| -13/2 | -0.110261+0.001765i   | 0.110275        | 0.000488-0.008991i    | 0.009004        | 0.250086-0.022428i   | 0.251090        |
| -11/2 | -0.018372+0.004675i   | 0.018957        | 0.001603+0.000225i    | 0.001619        | 0.033327-0.017069i   | 0.037444        |
| -9/2  | 0.011487-0.041852i    | 0.043400        | 0.002696-0.00233i     | 0.003563        | -0.007793-0.015466i  | 0.017318        |
| -7/2  | -0.065778+0.062838i   | 0.090969        | 0.00246-0.000198i     | 0.002468        | -0.006236-0.007289i  | 0.009593        |
| -5/2  | 0.00473-0.014444i     | 0.015199        | 0.001507+0.003446i    | 0.003761        | -0.596611-0.653251i  | <b>0.884693</b> |
| -3/2  | -0.005249+0.002093i   | 0.005651        | 0.006641+0.008199i    | 0.010551        | 0.056989-0.029553i   | 0.064196        |
| -1/2  | -0.008349-0.003897i   | 0.009214        | 0.019061+0.016139i    | 0.024976        | 0.003062+0.005594i   | 0.006377        |
| 1/2   | 0.012902+0.021386i    | 0.024976        | 0.002519+0.008863i    | 0.009214        | 0.004138+0.009908i   | 0.010737        |
| 3/2   | -0.007038-0.00786i    | 0.010550        | 0.002902-0.00485i     | 0.005652        | -0.198033+0.101383i  | 0.222476        |
| 5/2   | 0.003163+0.002036i    | 0.003762        | 0.015013-0.002373i    | 0.015199        | -0.065606-0.249981i  | 0.258447        |
| 7/2   | 0.000586-0.002397i    | 0.002468        | 0.0725-0.054946i      | 0.090969        | -0.026258+0.043799i  | 0.051067        |
| 9/2   | -0.002729+0.002291i   | 0.003563        | 0.043147-0.004684i    | 0.043401        | -0.010415-0.001617i  | 0.010540        |
| 11/2  | 0.000033-0.001619i    | 0.001619        | 0.007537-0.017394i    | 0.018957        | -0.106997-0.100376i  | 0.146710        |
| 13/2  | -0.008954-0.000948i   | 0.009004        | -0.01928+0.108577i    | 0.110275        | -0.041408+0.072987i  | 0.083915        |
| 15/2  | 0.006736              | 0.006736        | 0.987966              | <b>0.987966</b> | -0.000927            | 0.000927        |

| $M_J$ | 10                   |                 | 11                   |                 | 12                   |          |
|-------|----------------------|-----------------|----------------------|-----------------|----------------------|----------|
|       | 139 cm <sup>-1</sup> |                 | 169 cm <sup>-1</sup> |                 | 169 cm <sup>-1</sup> |          |
|       | c                    | c               | c                    | c               | c                    | c        |
| -15/2 | -0.000604+0.000703i  | 0.000927        | 0.013906+0.012668i   | 0.018811        | -0.000484-0.000441i  | 0.000655 |
| -13/2 | 0.082353+0.016116i   | 0.083915        | -0.016747-0.016524i  | 0.023527        | 0.003314+0.016951i   | 0.017272 |
| -11/2 | 0.006479+0.146566i   | 0.146709        | 0.315012-0.91138i    | <b>0.964285</b> | -0.004833-0.143643i  | 0.143724 |
| -9/2  | 0.005556-0.008956i   | 0.010539        | -0.061758+0.009914i  | 0.062549        | 0.004112-0.002054i   | 0.004596 |
| -7/2  | -0.050337-0.008602i  | 0.051067        | 0.01506-0.020058i    | 0.025082        | 0.012647+0.006177i   | 0.014075 |
| -5/2  | -0.14696-0.212597i   | 0.258447        | 0.014654-0.034208i   | 0.037215        | 0.057692-0.094704i   | 0.110893 |
| -3/2  | -0.205911+0.084239i  | 0.222476        | -0.170347+0.008816i  | 0.170575        | -0.01205+0.009367i   | 0.015262 |
| -1/2  | 0.004823+0.009593i   | 0.010737        | 0.01402+0.013707i    | 0.019607        | 0.004971+0.010505i   | 0.011622 |
| 1/2   | -0.002251-0.005967i  | 0.006377        | 0.010749-0.004418i   | 0.011622        | -0.019595+0.000692i  | 0.019607 |
| 3/2   | -0.059543+0.023996i  | 0.064196        | 0.0026+0.01504i      | 0.015263        | -0.119992-0.121235i  | 0.170576 |
| 5/2   | 0.107121+0.878183i   | <b>0.884692</b> | -0.021128+0.108862i  | 0.110893        | 0.012204-0.035157i   | 0.037215 |
| 7/2   | -0.00147-0.009479i   | 0.009592        | -0.013509-0.003951i  | 0.014075        | -0.002375+0.02497i   | 0.025083 |
| 9/2   | 0.006661+0.015987i   | 0.017319        | 0.001657+0.004287i   | 0.004596        | 0.038978+0.048918i   | 0.062548 |



|      |                     |          |                    |          |                     |                 |
|------|---------------------|----------|--------------------|----------|---------------------|-----------------|
| 11/2 | -0.034659+0.014172i | 0.037445 | 0.100307-0.102933i | 0.143724 | -0.380881+0.885876i | <b>0.964286</b> |
| 13/2 | 0.179901-0.175162i  | 0.251090 | 0.013865-0.0103i   | 0.017272 | 0.023508-0.000937i  | 0.023527        |
| 15/2 | 0.025029            | 0.025029 | 0.000655           | 0.000655 | 0.018811            | 0.018811        |

| $M_J$ | 13                   |                 | 14                   |                 | 15                   |                 |
|-------|----------------------|-----------------|----------------------|-----------------|----------------------|-----------------|
|       | 199 cm <sup>-1</sup> |                 | 199 cm <sup>-1</sup> |                 | 216 cm <sup>-1</sup> |                 |
|       | c                    | c               | c                    | c               | c                    | c               |
| -15/2 | -0.003263+0.001737i  | 0.003697        | -0.086988+0.046305i  | 0.098545        | -0.019474+0.033226i  | 0.038512        |
| -13/2 | 0.010165+0.001215i   | 0.010237        | 0.039588+0.00222i    | 0.039650        | -0.00453-0.008678i   | 0.009789        |
| -11/2 | -0.005988-0.016217i  | 0.017287        | -0.021313+0.018001i  | 0.027898        | 0.015749+0.058039i   | 0.060138        |
| -9/2  | 0.084055-0.076766i   | 0.113834        | -0.046498+0.087622i  | 0.099195        | -0.689897+0.680022i  | <b>0.968704</b> |
| -7/2  | 0.091522-0.003703i   | 0.091597        | 0.947572+0.213913i   | <b>0.971417</b> | -0.062263-0.05263i   | 0.081527        |
| -5/2  | -0.017063-0.0371i    | 0.040836        | -0.008158+0.000591i  | 0.008179        | 0.007944-0.016924i   | 0.018696        |
| -3/2  | 0.005156+0.007194i   | 0.008851        | -0.015651+0.00304i   | 0.015944        | 0.008977-0.001392i   | 0.009084        |
| -1/2  | 0.077274+0.06777i    | 0.102782        | -0.003312-0.006304i  | 0.007121        | 0.079187+0.067331i   | 0.103943        |
| 1/2   | -0.000038-0.007121i  | 0.007121        | 0.036368-0.096132i   | 0.102781        | -0.015486-0.016831i  | 0.022871        |
| 3/2   | -0.015244+0.004671i  | 0.015944        | -0.001171+0.008773i  | 0.008851        | -0.01699-0.006933i   | 0.018350        |
| 5/2   | 0.007479-0.003311i   | 0.008179        | 0.002371+0.040767i   | 0.040836        | 0.004284-0.004663i   | 0.006332        |
| 7/2   | 0.735934-0.634076i   | <b>0.971417</b> | -0.082529+0.039736i  | 0.091597        | 0.081578-0.085072i   | 0.117865        |
| 9/2   | 0.082217+0.055498i   | 0.099195        | 0.110269+0.028267i   | 0.113834        | -0.145113+0.048799i  | 0.153098        |
| 11/2  | -0.027272-0.005875i  | 0.027898        | -0.002334-0.017129i  | 0.017287        | 0.002943+0.016184i   | 0.016449        |
| 13/2  | -0.033902+0.020561i  | 0.039650        | 0.008402-0.005849i   | 0.010237        | -0.002955+0.003712i  | 0.004745        |
| 15/2  | -0.098545            | 0.098545        | 0.003697             | 0.003697        | -0.003091            | 0.003091        |

| $M_J$ | 16                   |                 |
|-------|----------------------|-----------------|
|       | 216 cm <sup>-1</sup> |                 |
|       | c                    | c               |
| -15/2 | -0.001563+0.002667i  | 0.003091        |
| -13/2 | 0.004697-0.000672i   | 0.004745        |
| -11/2 | -0.012475-0.010723i  | 0.016450        |
| -9/2  | 0.115478-0.100518i   | 0.153098        |
| -7/2  | 0.114645-0.027363i   | 0.117865        |
| -5/2  | -0.006189+0.001338i  | 0.006332        |
| -3/2  | -0.00261+0.018164i   | 0.018351        |
| -1/2  | -0.00669-0.021871i   | 0.022871        |
| 1/2   | -0.018047-0.102364i  | 0.103943        |
| 3/2   | -0.00574+0.00704i    | 0.009083        |
| 5/2   | 0.018618+0.001704i   | 0.018696        |
| 7/2   | -0.013922-0.080329i  | 0.081527        |
| 9/2   | -0.93553+0.25134i    | <b>0.968704</b> |
| 11/2  | 0.042109+0.042936i   | 0.060139        |
| 13/2  | 0.005196+0.008296i   | 0.009789        |
| 15/2  | 0.038512             | 0.038512        |

**Table S24.** CASSCF/RASSI calculated energies and wave functions of the [Er(Por)(cyclen)]<sup>+</sup> with an absolute coefficient larger than 0.05.

| Basis set 2                |                                        |
|----------------------------|----------------------------------------|
| Energy (cm <sup>-1</sup> ) | Wave Function                          |
| 0.00                       | -1/2 >,   +7/2 >,   -9/2 >             |
| 0.00                       | +1/2 >,   -7/2 >,   +9/2 >             |
| 39.6                       | -3/2 >,   +13/2 >,   +5/2 >,   -11/2 > |
| 39.6                       | +3/2 >,   -13/2 >,   -5/2 >,   +11/2 > |

|      |                                                                                                      |
|------|------------------------------------------------------------------------------------------------------|
| 96.8 | $  -13/2 \rangle,   +3/2 \rangle,   +13/2 \rangle,   -3/2 \rangle,   +11/2 \rangle,   -11/2 \rangle$ |
| 96.8 | $  +13/2 \rangle,   -3/2 \rangle,   -13/2 \rangle,   +3/2 \rangle,   -11/2 \rangle,   +11/2 \rangle$ |
| 98.1 | $  -15/2 \rangle,   -7/2 \rangle,   +1/2 \rangle$                                                    |
| 98.1 | $  +15/2 \rangle,   +7/2 \rangle,   -1/2 \rangle$                                                    |
| 140  | $  -5/2 \rangle,   +11/2 \rangle,   +3/2 \rangle,   -13/2 \rangle$                                   |
| 140  | $  +5/2 \rangle,   -11/2 \rangle,   -3/2 \rangle,   +13/2 \rangle$                                   |
| 179  | $  -11/2 \rangle,   +5/2 \rangle,   +13/2 \rangle$                                                   |
| 179  | $  +11/2 \rangle,   -5/2 \rangle,   -13/2 \rangle$                                                   |
| 194  | $  -7/2 \rangle,   +9/2 \rangle,   -15/2 \rangle,   +7/2 \rangle,   -9/2 \rangle,   +1/2 \rangle$    |
| 194  | $  +7/2 \rangle,   -9/2 \rangle,   +15/2 \rangle,   -7/2 \rangle,   +9/2 \rangle,   -1/2 \rangle$    |
| 214  | $  +9/2 \rangle,   -7/2 \rangle,   +1/2 \rangle,   -9/2 \rangle,   -15/2 \rangle$                    |
| 214  | $  -9/2 \rangle,   +7/2 \rangle,   -1/2 \rangle,   +9/2 \rangle,   +15/2 \rangle$                    |

**Table S25.** Composition of wavefunctions for [Er(Por)(cyclen)]<sup>+</sup> as extracted from CASSCF/RASSI/Single\_Aniso calculations with basis set 2.

| $M_J$ | Wave Functions and Energies |                 |                       |                 |                       |                 |
|-------|-----------------------------|-----------------|-----------------------|-----------------|-----------------------|-----------------|
|       | 1                           |                 | 2                     |                 | 3                     |                 |
|       | 0.00 cm <sup>-1</sup>       |                 | 0.00 cm <sup>-1</sup> |                 | 39.6 cm <sup>-1</sup> |                 |
|       | c                           | c               | c                     | c               | c                     | c               |
| -15/2 | 0.014448+0.009611i          | 0.017353        | -0.000043-0.000029i   | 0.000052        | 0.000086-0.000068i    | 0.000110        |
| -13/2 | 0.000003+0.000001i          | 0.000003        | -0.000083-0.000023i   | 0.000086        | -0.045268-0.049346i   | 0.066964        |
| -11/2 | 0.000022+0.00011i           | 0.000112        | 0.00005-0.000078i     | 0.000093        | 0.055353-0.074964i    | 0.093186        |
| -9/2  | -0.000336-0.000075i         | 0.000344        | -0.099585-0.032382i   | 0.104718        | -0.000023+0.000024i   | 0.000033        |
| -7/2  | 0.065603+0.111495i          | 0.129363        | -0.000158-0.000299i   | 0.000338        | 0.000126+0.000104i    | 0.000163        |
| -5/2  | 0.000005-0.000018i          | 0.000019        | -0.000129-0.000241i   | 0.000273        | -0.041159-0.230735i   | 0.234377        |
| -3/2  | -0.000504+0.000485i         | 0.000699        | -0.000068-0.00001i    | 0.000069        | 0.604975-0.08757i     | 0.611280        |
| -1/2  | -0.000563-0.002557i         | 0.002618        | -0.179568-0.969405i   | <b>0.985896</b> | -0.000507+0.000199i   | 0.000545        |
| 1/2   | -0.68642+0.707685i          | <b>0.985896</b> | 0.001885-0.001817i    | 0.002618        | -0.00046-0.00004i     | 0.000462        |
| 3/2   | 0.000063+0.000029i          | 0.000069        | -0.000151-0.000683i   | 0.000699        | 0.671309-0.227344i    | <b>0.708760</b> |
| 5/2   | -0.000242+0.000129i         | 0.000274        | 0.000006-0.000017i    | 0.000018        | 0.058531+0.193448i    | 0.202109        |
| 7/2   | 0.000297-0.000161i          | 0.000338        | 0.116374-0.056498i    | 0.129364        | 0.000048-0.000117i    | 0.000126        |
| 9/2   | -0.100851-0.028194i         | 0.104718        | 0.000322+0.000123i    | 0.000345        | -0.000003-0.000009i   | 0.000009        |
| 11/2  | 0.000002-0.000093i          | 0.000093        | 0.000079-0.000079i    | 0.000112        | 0.096603+0.048411i    | 0.108054        |
| 13/2  | -0.000082-0.000026i         | 0.000086        | -0.000003-0.000001i   | 0.000003        | -0.015631+0.05592i    | 0.058064        |
| 15/2  | 0.000052                    | 0.000052        | 0.017352              | 0.017352        | 0.000016              | 0.000016        |

| $M_J$ | 4                     |                 | 5                     |          | 6                     |                 |
|-------|-----------------------|-----------------|-----------------------|----------|-----------------------|-----------------|
|       | 39.6 cm <sup>-1</sup> |                 | 96.8 cm <sup>-1</sup> |          | 96.8 cm <sup>-1</sup> |                 |
|       | c                     | c               | c                     | c        | c                     | c               |
| -15/2 | -0.000013+0.00001i    | 0.000016        | -0.000483+0.000426i   | 0.000644 | -0.010411+0.009175i   | 0.013877        |
| -13/2 | -0.046867-0.034276i   | 0.058063        | -0.051164-0.047898i   | 0.070085 | 0.780312+0.432393i    | <b>0.892105</b> |
| -11/2 | -0.045974+0.097786i   | 0.108054        | -0.035338+0.038864i   | 0.052528 | -0.002105+0.003442i   | 0.004035        |
| -9/2  | 0.000003+0.000008i    | 0.000009        | -0.000079-0.000051i   | 0.000094 | 0.00015+0.000161i     | 0.000220        |
| -7/2  | -0.00011-0.000062i    | 0.000126        | -0.000162-0.000006i   | 0.000162 | -0.001541+0.000623i   | 0.001662        |
| -5/2  | -0.073643-0.188215i   | 0.202109        | -0.008661-0.029246i   | 0.030501 | 0.198589+0.336648i    | 0.390857        |
| -3/2  | -0.668132+0.236518i   | <b>0.708760</b> | -0.205376+0.010968i   | 0.205669 | -0.015578+0.004856i   | 0.016317        |
| -1/2  | -0.000337+0.000316i   | 0.000462        | -0.000047-0.000436i   | 0.000439 | -0.000122-0.000085i   | 0.000149        |
| 1/2   | 0.000522-0.000157i    | 0.000545        | 0.000035-0.000144i    | 0.000148 | 0.000253+0.000358i    | 0.000438        |
| 3/2   | 0.529562-0.305332i    | 0.611280        | -0.014898+0.006657i   | 0.016318 | 0.16133-0.127563i     | 0.205669        |
| 5/2   | -0.110354-0.206771i   | 0.234376        | 0.073598+0.383865i    | 0.390857 | 0.012839+0.027667i    | 0.030501        |
| 7/2   | 0.000035-0.00016i     | 0.000164        | -0.001568+0.000552i   | 0.001662 | 0.000118-0.000112i    | 0.000163        |
| 9/2   | 0.000033+0.000004i    | 0.000033        | -0.000006+0.00022i    | 0.000220 | -0.000026+0.00009i    | 0.000094        |

|      |                    |          |                     |                 |                     |          |
|------|--------------------|----------|---------------------|-----------------|---------------------|----------|
| 11/2 | 0.089859+0.024675i | 0.093185 | -0.003855-0.001191i | 0.004035        | 0.052208+0.005793i  | 0.052528 |
| 13/2 | 0.005055-0.066774i | 0.066965 | -0.29952+0.84032i   | <b>0.892104</b> | -0.006715+0.069763i | 0.070085 |
| 15/2 | 0.00011            | 0.000110 | -0.013877           | 0.013877        | 0.000644            | 0.000644 |

| $M_J$ | 7                     |                 | 8                     |                 | 9                    |                 |
|-------|-----------------------|-----------------|-----------------------|-----------------|----------------------|-----------------|
|       | 98.1 cm <sup>-1</sup> |                 | 98.1 cm <sup>-1</sup> |                 | 140 cm <sup>-1</sup> |                 |
|       | c                     | c               | c                     | c               | c                    | c               |
| -15/2 | -0.000194-0.000168i   | 0.000257        | 0.749825+0.648718i    | <b>0.991500</b> | 0.000002+0.000003i   | 0.000004        |
| -13/2 | -0.001244-0.000975i   | 0.001581        | -0.004545+0.01155i    | 0.012412        | -0.211127-0.170257i  | 0.271223        |
| -11/2 | -0.000505+0.000536i   | 0.000736        | 0.000128+0.000192i    | 0.000231        | -0.094067-0.020841i  | 0.096348        |
| -9/2  | 0.005797+0.002259i    | 0.006222        | 0.000035+0.000021i    | 0.000041        | -0.000098+0.000139i  | 0.000170        |
| -7/2  | -0.000019-0.000031i   | 0.000036        | 0.061135+0.108895i    | 0.124882        | 0.000021-0.00023i    | 0.000231        |
| -5/2  | -0.000222-0.000544i   | 0.000588        | -0.004264+0.003507i   | 0.005521        | 0.187231+0.501502i   | 0.535313        |
| -3/2  | -0.002806+0.0001i     | 0.002808        | -0.000151-0.000469i   | 0.000493        | -0.097298-0.147095i  | 0.176363        |
| -1/2  | 0.004359+0.032841i    | 0.033129        | 0.000003-0.000002i    | 0.000004        | -0.000094-0.000089i  | 0.000129        |
| 1/2   | -0.000001-0.000004i   | 0.000004        | 0.024784-0.021984i    | 0.033129        | 0.00011-0.000014i    | 0.000111        |
| 3/2   | -0.000421+0.000256i   | 0.000493        | 0.002057+0.001911i    | 0.002808        | 0.121937-0.068179i   | 0.139703        |
| 5/2   | 0.00093+0.005442i     | 0.005521        | -0.000524+0.000266i   | 0.000588        | -0.499811+0.454989i  | <b>0.675889</b> |
| 7/2   | 0.117481-0.042352i    | 0.124882        | 0.000035-0.000011i    | 0.000037        | -0.000032+0.000072i  | 0.000079        |
| 9/2   | -0.000041-0.000007i   | 0.000042        | 0.005862+0.002084i    | 0.006221        | 0.000074+0.000207i   | 0.000220        |
| 11/2  | 0.000222-0.000061i    | 0.000230        | 0.000031+0.000736i    | 0.000737        | 0.074196+0.019171i   | 0.076633        |
| 13/2  | -0.00412+0.011709i    | 0.012413        | -0.001579-0.000076i   | 0.001581        | 0.335328-0.069505i   | 0.342456        |
| 15/2  | 0.9915                | <b>0.991500</b> | 0.000256              | 0.000256        | -0.000162            | 0.000162        |

| $M_J$ | 10                   |                 | 11                   |                 | 12                   |                 |
|-------|----------------------|-----------------|----------------------|-----------------|----------------------|-----------------|
|       | 140 cm <sup>-1</sup> |                 | 179 cm <sup>-1</sup> |                 | 179 cm <sup>-1</sup> |                 |
|       | c                    | c               | c                    | c               | c                    | c               |
| -15/2 | -0.000076-0.000143i  | 0.000162        | -0.000009+0.000028i  | 0.000029        | 0.000139-0.000429i   | 0.000451        |
| -13/2 | -0.095135-0.328976i  | 0.342456        | -0.0195-0.000934i    | 0.019522        | -0.00222+0.000737i   | 0.002339        |
| -11/2 | 0.051601+0.056656i   | 0.076633        | 0.085972-0.062819i   | 0.106477        | -0.642569+0.733126i  | <b>0.974869</b> |
| -9/2  | -0.000218+0.000031i  | 0.000220        | -0.000131+0.000013i  | 0.000132        | 0.000513-0.000425i   | 0.000666        |
| -7/2  | 0.000048-0.000062i   | 0.000078        | -0.000112-0.000129i  | 0.000171        | -0.000106+0.001281i  | 0.001285        |
| -5/2  | -0.168921+0.65444i   | <b>0.675889</b> | 0.071006+0.044447i   | 0.083770        | 0.008802+0.002915i   | 0.009272        |
| -3/2  | -0.003345+0.139663i  | 0.139703        | -0.01884-0.00299i    | 0.019076        | 0.174095-0.011307i   | 0.174462        |
| -1/2  | -0.000039-0.000104i  | 0.000111        | 0.000046-0.000129i   | 0.000137        | -0.000055-0.000134i  | 0.000145        |
| 1/2   | -0.000122-0.000042i  | 0.000129        | -0.000111-0.000094i  | 0.000145        | 0.000137-0.000004i   | 0.000137        |
| 3/2   | 0.175508+0.017344i   | 0.176363        | 0.064377-0.162149i   | 0.174461        | 0.002958-0.018845i   | 0.019076        |
| 5/2   | 0.530894-0.068636i   | 0.535312        | 0.000062+0.009272i   | 0.009272        | -0.020417-0.081244i  | 0.083770        |
| 7/2   | 0.000194-0.000126i   | 0.000231        | -0.001252-0.000293i  | 0.001286        | -0.000088-0.000146i  | 0.000170        |
| 9/2   | 0.000078-0.000151i   | 0.000170        | -0.000563+0.000358i  | 0.000667        | -0.000053+0.000121i  | 0.000132        |
| 11/2  | 0.062357+0.073447i   | 0.096348        | -0.895394+0.385537i  | <b>0.974869</b> | -0.086244+0.062445i  | 0.106477        |
| 13/2  | -0.249146-0.107183i  | 0.271223        | 0.001385-0.001885i   | 0.002339        | -0.005117+0.01884i   | 0.019523        |
| 15/2  | -0.000004            | 0.000004        | 0.000451             | 0.000451        | 0.000029             | 0.000029        |

| $M_J$ | 13                   |          | 14                   |                 | 15                   |          |
|-------|----------------------|----------|----------------------|-----------------|----------------------|----------|
|       | 194 cm <sup>-1</sup> |          | 194 cm <sup>-1</sup> |                 | 214 cm <sup>-1</sup> |          |
|       | c                    | c        | c                    | c               | c                    | c        |
| -15/2 | -0.000178+0.000218i  | 0.000281 | -0.080704+0.098935i  | 0.127676        | 0.007302-0.006062i   | 0.009490 |
| -13/2 | 0.000046-0.000004i   | 0.000046 | -0.000083+0.000072i  | 0.000110        | 0.00009+0.000081i    | 0.000121 |
| -11/2 | -0.000217-0.000007i  | 0.000217 | -0.001294-0.000064i  | 0.001296        | -0.000302-0.000067i  | 0.000309 |
| -9/2  | -0.110983-0.052829i  | 0.122915 | -0.000497+0.000424i  | 0.000653        | -0.507108-0.244936i  | 0.563163 |
| -7/2  | 0.001898-0.001061i   | 0.002174 | 0.8393-0.501388i     | <b>0.977658</b> | -0.083856+0.031924i  | 0.089727 |
| -5/2  | -0.000116+0.000058i  | 0.000130 | 0.000088-0.000167i   | 0.000189        | 0.000171-0.000031i   | 0.000174 |
| -3/2  | -0.00004+0.000041i   | 0.000057 | 0.00004+0.000336i    | 0.000338        | 0.000042-0.000021i   | 0.000047 |
| -1/2  | -0.009049-0.112634i  | 0.112997 | 0.000109+0.000302i   | 0.000321        | 0.003438+0.067678i   | 0.067765 |

|      |                     |                 |                     |          |                     |                 |
|------|---------------------|-----------------|---------------------|----------|---------------------|-----------------|
| 1/2  | -0.000165-0.000275i | 0.000321        | -0.081559-0.078207i | 0.112996 | 0.059996+0.077099i  | 0.097692        |
| 3/2  | 0.000235+0.000243i  | 0.000338        | -0.000057+0.000005i | 0.000057 | -0.000049-0.00011i  | 0.000120        |
| 5/2  | 0.000185+0.000037i  | 0.000189        | 0.000118-0.000054i  | 0.000130 | -0.000206+0.000089i | 0.000224        |
| 7/2  | -0.919039+0.333439i | <b>0.977658</b> | 0.002022-0.0008i    | 0.002175 | 0.058104-0.020445i  | 0.061596        |
| 9/2  | -0.000643+0.000117i | 0.000654        | 0.029216-0.119393i  | 0.122916 | 0.322105-0.743628i  | <b>0.810391</b> |
| 11/2 | 0.000768-0.001044i  | 0.001296        | -0.000132+0.000173i | 0.000218 | -0.000311+0.000494i | 0.000584        |
| 13/2 | -0.000108+0.000019i | 0.000110        | -0.000032+0.000033i | 0.000046 | -0.000014+0.00017i  | 0.000171        |
| 15/2 | 0.127677            | 0.127677        | -0.000281           | 0.000281 | -0.006486           | 0.006486        |

| $M_J$ | 16                   |                 |
|-------|----------------------|-----------------|
|       | 214 cm <sup>-1</sup> |                 |
|       | c                    | c               |
| -15/2 | -0.00499+0.004143i   | 0.006486        |
| -13/2 | 0.000119+0.000122i   | 0.000170        |
| -11/2 | -0.000555-0.000181i  | 0.000584        |
| -9/2  | -0.722827-0.36641i   | <b>0.810392</b> |
| -7/2  | 0.057765-0.021383i   | 0.061596        |
| -5/2  | 0.000215-0.000063i   | 0.000224        |
| -3/2  | 0.000032+0.000116i   | 0.000120        |
| -1/2  | 0.003085+0.097644i   | 0.097693        |
| 1/2   | -0.040584-0.054268i  | 0.067765        |
| 3/2   | -0.000046+0.000011i  | 0.000047        |
| 5/2   | 0.000152-0.000085i   | 0.000174        |
| 7/2   | 0.084912-0.029001i   | 0.089728        |
| 9/2   | -0.23372+0.512374i   | 0.563163        |
| 11/2  | 0.000189-0.000244i   | 0.000309        |
| 13/2  | 0.000017-0.000119i   | 0.000120        |
| 15/2  | -0.009491            | 0.009491        |

**Table S26.** Ab initio ligand-field parameters  $B_n^m$  (in cm<sup>-1</sup>) of the [Tm(TPP)(cyclen)]<sup>+</sup>

| n | m | Experimental Geometry |                | Symmetrized- $C_4$ Geometry |                |
|---|---|-----------------------|----------------|-----------------------------|----------------|
|   |   | Real part             | Imaginary part | Real part                   | Imaginary part |
| 2 | 0 | <b>-37.35</b>         | <b>0.00</b>    | <b>26.86</b>                | <b>0.00</b>    |
|   | 1 | <b>10.86</b>          | <b>10.86</b>   | -0.01                       | -0.01          |
|   | 2 | <b>-51.85</b>         | <b>14.76</b>   | 0.00                        | 0.00           |
| 4 | 0 | <b>3.54</b>           | <b>0.00</b>    | <b>-84.59</b>               | <b>0.00</b>    |
|   | 1 | <b>28.10</b>          | <b>71.41</b>   | 0.01                        | -0.01          |
|   | 2 | <b>38.72</b>          | <b>38.72</b>   | -0.02                       | -0.02          |
|   | 3 | <b>51.57</b>          | <b>31.23</b>   | 0.00                        | 0.00           |
|   | 4 | <b>-0.34</b>          | <b>76.47</b>   | <b>-4.74</b>                | <b>41.19</b>   |
|   | 0 | <b>6.12</b>           | <b>0.00</b>    | <b>18.72</b>                | <b>0.00</b>    |
| 6 | 1 | <b>1.57</b>           | <b>0.94</b>    | 0.00                        | 0.00           |
|   | 2 | <b>10.81</b>          | <b>-7.27</b>   | 0.00                        | 0.00           |
|   | 3 | <b>5.01</b>           | <b>5.01</b>    | 0.00                        | 0.00           |
|   | 4 | <b>0.46</b>           | <b>-11.46</b>  | <b>-4.80</b>                | <b>-3.80</b>   |
|   | 5 | <b>15.71</b>          | <b>-7.06</b>   | 0.00                        | 0.00           |
|   | 6 | <b>3.68</b>           | <b>8.93</b>    | 0.00                        | 0.00           |

**Table S27.** CASSCF/RASSI calculated energies and wave functions of the [Tm(TPP)(cyclen)]<sup>+</sup> with an absolute coefficient larger than 0.05.

| Basis set 2                |                                                                                            |
|----------------------------|--------------------------------------------------------------------------------------------|
| Energy (cm <sup>-1</sup> ) | Wave Function                                                                              |
| 0.00                       | $ \pm 6\rangle,  \pm 2\rangle,  \pm 4\rangle,  \pm 5\rangle,  \pm 3\rangle,  \pm 1\rangle$ |

|      |                                                                                                       |
|------|-------------------------------------------------------------------------------------------------------|
| 7.40 | $ \pm 6\rangle,  \pm 4\rangle,  \pm 5\rangle,  \pm 3\rangle,  \pm 1\rangle,  \pm 2\rangle$            |
| 11.2 | $ \pm 5\rangle,  \pm 3\rangle,  \pm 1\rangle,  \pm 2\rangle,  \pm 4\rangle,  0\rangle,  \pm 6\rangle$ |
| 16.7 | $ \pm 5\rangle,  \pm 2\rangle,  \pm 1\rangle,  \pm 6\rangle,  \pm 3\rangle,  0\rangle$                |
| 24.7 | $ \pm 1\rangle,  \pm 3\rangle,  0\rangle,  \pm 2\rangle,  \pm 4\rangle,  \pm 5\rangle,  \pm 6\rangle$ |
| 28.0 | $ 0\rangle,  \pm 4\rangle,  \pm 3\rangle,  \pm 2\rangle,  \pm 1\rangle,  \pm 5\rangle,  \pm 6\rangle$ |
| 76.9 | $ \pm 4\rangle,  \pm 6\rangle,  \pm 3\rangle,  \pm 1\rangle,  \pm 2\rangle,  \pm 5\rangle$            |
| 99.1 | $ \pm 4\rangle,  \pm 6\rangle,  \pm 3\rangle,  0\rangle,  \pm 5\rangle,  \pm 2\rangle,  \pm 1\rangle$ |
| 105  | $ \pm 3\rangle,  \pm 2\rangle,  \pm 5\rangle,  \pm 6\rangle,  \pm 1\rangle,  \pm 4\rangle$            |
| 167  | $ \pm 2\rangle,  \pm 5\rangle,  \pm 6\rangle,  \pm 1\rangle,  0\rangle,  \pm 3\rangle$                |
| 173  | $ \pm 3\rangle,  \pm 5\rangle,  \pm 1\rangle,  \pm 6\rangle,  0\rangle,  \pm 4\rangle,  \pm 2\rangle$ |
| 212  | $ \pm 1\rangle,  \pm 5\rangle,  \pm 4\rangle,  \pm 6\rangle,  \pm 2\rangle,  \pm 3\rangle$            |
| 213  | $ 0\rangle,  \pm 2\rangle,  \pm 4\rangle,  \pm 5\rangle,  \pm 3\rangle,  \pm 6\rangle,  \pm 1\rangle$ |

**Table S28.** Composition of wave functions for  $[\text{Tm}(\text{TPP})(\text{cyclen})]^+$  as extracted from CASSCF/RASSI/Single\_Aniso calculations with basis set 2.

| $M_J$ | Wave Functions and Energies |                 |                       |                 |                       |                 |
|-------|-----------------------------|-----------------|-----------------------|-----------------|-----------------------|-----------------|
|       | 1                           |                 | 2                     |                 | 3                     |                 |
|       | 0.00 $\text{cm}^{-1}$       |                 | 7.40 $\text{cm}^{-1}$ |                 | 11.2 $\text{cm}^{-1}$ |                 |
|       | c                           | c               | c                     | c               | c                     | c               |
| -6    | 0.031671-0.456952i          | <b>0.458048</b> | 0.047655-0.521094i    | <b>0.523269</b> | -0.093659+0.012863i   | 0.094538        |
| -5    | -0.168763+0.003709i         | 0.168804        | -0.274746+0.05922i    | 0.281056        | 0.381619+0.139798i    | <b>0.406419</b> |
| -4    | 0.240553+0.155707i          | 0.286549        | 0.227647+0.18372i     | 0.292534        | 0.07419+0.119315i     | 0.140500        |
| -3    | -0.076736+0.141513i         | 0.160979        | -0.117742+0.118918i   | 0.167346        | -0.296222+0.268763i   | 0.399976        |
| -2    | -0.374779+0.032526i         | 0.376188        | -0.124524+0.03452i    | 0.129220        | -0.171761-0.178005i   | 0.247361        |
| -1    | -0.083914-0.071252i         | 0.110084        | -0.090205-0.093221i   | 0.129719        | 0.121814-0.247546i    | 0.275894        |
| 0     | -0.006271+0.005851i         | 0.008577        | 0.009173+0.01005i     | 0.013607        | -0.009077-0.132801i   | 0.133111        |
| 1     | -0.06528-0.08864i           | 0.110084        | 0.084618+0.09832i     | 0.129719        | 0.154364+0.22867i     | 0.275895        |
| 2     | -0.058362+0.371634i         | 0.376189        | 0.045717-0.120862i    | 0.129219        | 0.145944-0.19972i     | 0.247362        |
| 3     | 0.14648-0.066767i           | 0.160979        | -0.129146+0.106423i   | 0.167346        | -0.330037-0.225958i   | 0.399977        |
| 4     | -0.138702-0.250743i         | 0.286549        | 0.162225+0.243432i    | 0.292534        | -0.057266+0.1283i     | 0.140500        |
| 5     | 0.015369-0.168103i          | 0.168804        | -0.083995+0.268211i   | 0.281056        | 0.359048-0.190423i    | <b>0.406419</b> |
| 6     | 0.458048                    | <b>0.458048</b> | -0.523268             | <b>0.523268</b> | 0.094538              | 0.094538        |

| $M_J$ | 4                     |                 | 5                     |                 | 6                     |                 |
|-------|-----------------------|-----------------|-----------------------|-----------------|-----------------------|-----------------|
|       | 16.7 $\text{cm}^{-1}$ |                 | 24.7 $\text{cm}^{-1}$ |                 | 28.0 $\text{cm}^{-1}$ |                 |
|       | c                     | c               | c                     | c               | c                     | c               |
| -6    | -0.093782+0.216502i   | 0.235941        | -0.028474-0.045304i   | 0.053509        | -0.066672-0.015147i   | 0.068371        |
| -5    | 0.485746-0.049532i    | <b>0.488265</b> | 0.018443+0.053869i    | 0.056939        | 0.038506+0.114305i    | 0.120617        |
| -4    | 0.032537+0.016333i    | 0.036406        | 0.196108+0.019972i    | 0.197122        | -0.31574-0.032016i    | 0.317359        |
| -3    | -0.061739+0.135041i   | 0.148485        | 0.017074-0.331145i    | 0.331585        | -0.183365-0.252059i   | 0.311699        |
| -2    | -0.340519-0.092003i   | 0.352729        | 0.191493-0.068443i    | 0.203357        | -0.209259+0.122564i   | 0.242510        |
| -1    | -0.044512-0.233395i   | 0.237602        | -0.340278-0.396383i   | <b>0.522407</b> | -0.107081-0.110016i   | 0.153525        |
| 0     | 0.048512-0.031854i    | 0.058035        | 0.120096-0.217327i    | 0.248302        | -0.07059+0.629334i    | <b>0.633281</b> |
| 1     | -0.196473-0.133615i   | 0.237602        | -0.516674-0.077173i   | <b>0.522406</b> | -0.128794+0.083559i   | 0.153525        |
| 2     | -0.050928+0.349033i   | 0.352729        | -0.043951-0.198551i   | 0.203357        | 0.176906+0.165879i    | 0.242511        |
| 3     | 0.148455-0.002976i    | 0.148485        | -0.271282+0.190668i   | 0.331584        | -0.234651+0.205172i   | 0.311700        |
| 4     | -0.002055-0.036348i   | 0.036406        | -0.121264-0.15541i    | 0.197122        | 0.314987+0.03873i     | 0.317359        |
| 5     | -0.238527+0.426037i   | <b>0.488265</b> | 0.055423-0.01305i     | 0.056939        | 0.062873-0.102934i    | 0.120617        |
| 6     | -0.235941             | 0.235941        | 0.053509              | 0.053509        | 0.068371              | 0.068371        |

| $M_J$ | 7                     |   | 8                     |   | 9                    |   |
|-------|-----------------------|---|-----------------------|---|----------------------|---|
|       | 76.9 $\text{cm}^{-1}$ |   | 99.1 $\text{cm}^{-1}$ |   | 105 $\text{cm}^{-1}$ |   |
|       | c                     | c | c                     | c | c                    | c |

|    |                     |                 |                     |                 |                     |                 |
|----|---------------------|-----------------|---------------------|-----------------|---------------------|-----------------|
| -6 | 0.06796+0.265467i   | 0.274028        | -0.061278-0.378723i | 0.383648        | 0.013145+0.196199i  | 0.196639        |
| -5 | 0.018366+0.064907i  | 0.067455        | 0.134431-0.124438i  | 0.183184        | -0.216918+0.063282i | 0.225960        |
| -4 | 0.516602+0.222381i  | <b>0.562433</b> | -0.41273-0.170825i  | <b>0.446685</b> | 0.028442+0.124108i  | 0.127325        |
| -3 | -0.019638-0.235829i | 0.236645        | 0.077889+0.202425i  | 0.216893        | -0.094011+0.487525i | <b>0.496506</b> |
| -2 | 0.141573+0.044037i  | 0.148264        | 0.138848-0.10056i   | 0.171438        | 0.32508-0.073295i   | 0.333240        |
| -1 | -0.098496-0.126386i | 0.160234        | -0.041463-0.143024i | 0.148913        | 0.016836+0.188717i  | 0.189467        |
| 0  | 0.021465+0.016662i  | 0.027173        | 0.133222-0.15651i   | 0.205532        | -0.025253-0.023618i | 0.034576        |
| 1  | 0.146865+0.064075i  | 0.160234        | -0.14781-0.018086i  | 0.148912        | -0.189421-0.004183i | 0.189467        |
| 2  | 0.077772+0.126228i  | 0.148263        | 0.077092-0.153127i  | 0.171438        | -0.0514+0.329253i   | 0.333241        |
| 3  | 0.233332-0.039462i  | 0.236645        | 0.212267+0.044557i  | 0.216893        | -0.48015+0.126391i  | <b>0.496507</b> |
| 4  | 0.343552+0.445312i  | <b>0.562433</b> | 0.234555+0.380147i  | <b>0.446685</b> | 0.125731+0.020082i  | 0.127325        |
| 5  | -0.067434-0.001695i | 0.067455        | -0.101368+0.152581i | 0.183184        | -0.04864+0.220663i  | 0.225960        |
| 6  | 0.274028            | 0.274028        | 0.383648            | 0.383648        | 0.196639            | 0.196639        |

| $M_J$ | 10                   |                 | 11                   |                 | 12                   |                 |
|-------|----------------------|-----------------|----------------------|-----------------|----------------------|-----------------|
|       | 167 cm <sup>-1</sup> |                 | 173 cm <sup>-1</sup> |                 | 212 cm <sup>-1</sup> |                 |
|       | c                    | c               | c                    | c               | c                    | c               |
| -6    | 0.104928+0.278417i   | 0.297533        | -0.095896-0.234707i  | 0.253542        | -0.103351-0.06415i   | 0.121641        |
| -5    | -0.240958+0.230878i  | 0.333715        | 0.276218-0.243043i   | 0.367922        | 0.10087-0.264967i    | 0.283518        |
| -4    | 0.010364-0.015096i   | 0.018311        | 0.108201-0.001651i   | 0.108214        | 0.248304+0.017375i   | 0.248911        |
| -3    | -0.089121+0.042362i  | 0.098677        | 0.022603-0.404101i   | <b>0.404733</b> | -0.073478+0.00716i   | 0.073826        |
| -2    | -0.489217+0.167012i  | <b>0.516939</b> | -0.01112+0.080928i   | 0.081688        | -0.093737+0.0385i    | 0.101335        |
| -1    | 0.102868+0.081305i   | 0.131120        | 0.261655+0.20596i    | 0.332991        | 0.489324+0.294579i   | <b>0.571152</b> |
| 0     | -0.08717-0.060303i   | 0.105996        | 0.067258-0.100136i   | 0.120627        | 0.041484+0.011828i   | 0.043137        |
| 1     | -0.112359-0.067586i  | 0.131120        | 0.289625+0.164317i   | 0.332991        | -0.571099-0.007769i  | <b>0.571152</b> |
| 2     | -0.016245-0.516684i  | <b>0.516939</b> | -0.07071+0.040903i   | 0.081688        | -0.059338-0.082145i  | 0.101335        |
| 3     | -0.008211+0.098335i  | 0.098677        | -0.365533+0.173766i  | <b>0.404733</b> | 0.058654+0.044834i   | 0.073827        |
| 4     | -0.010471+0.015022i  | 0.018311        | -0.039396-0.100787i  | 0.108213        | 0.220131+0.116186i   | 0.248911        |
| 5     | -0.131068+0.306898i  | 0.333714        | -0.120515+0.347624i  | 0.367922        | 0.054032-0.278321i   | 0.283517        |
| 6     | 0.297533             | 0.297533        | 0.253542             | 0.253542        | -0.121641            | 0.121641        |

| $M_J$ | 13                   |                 |
|-------|----------------------|-----------------|
|       | 213 cm <sup>-1</sup> |                 |
|       | c                    | c               |
| -6    | 0.111273+0.057509i   | 0.125256        |
| -5    | -0.067254+0.224372i  | 0.234235        |
| -4    | -0.252016-0.04571i   | 0.256128        |
| -3    | -0.035381-0.164733i  | 0.168490        |
| -2    | -0.219169+0.247764i  | 0.330790        |
| -1    | 0.024684+0.057944i   | 0.062983        |
| 0     | 0.157448-0.647566i   | <b>0.666432</b> |
| 1     | 0.048532-0.040142i   | 0.062982        |
| 2     | 0.080946+0.320734i   | 0.330791        |
| 3     | -0.107066+0.130098i  | 0.168489        |
| 4     | 0.244869+0.075102i   | 0.256127        |
| 5     | 0.043271-0.230203i   | 0.234234        |
| 6     | -0.125255            | 0.125255        |

**Table S29.** CASSCF/RASSI calculated energies and wave functions of the [Tm(Por)(cyclen)]<sup>+</sup> with an absolute coefficient larger than 0.05.

| Basis set 2                |                                |
|----------------------------|--------------------------------|
| Energy (cm <sup>-1</sup> ) | Wave Function                  |
| 0.00                       | $ \pm 6\rangle,  \pm 2\rangle$ |

|      |                                               |
|------|-----------------------------------------------|
| 3.31 | $ \pm 6\rangle,  \pm 2\rangle$                |
| 30.8 | $ \pm 1\rangle,  \pm 3\rangle,  \pm 5\rangle$ |
| 30.8 | $ \pm 1\rangle,  \pm 3\rangle,  \pm 5\rangle$ |
| 31.7 | $ 0\rangle,  \pm 4\rangle$                    |
| 37.2 | $ \pm 2\rangle,  \pm 6\rangle$                |
| 77.1 | $ \pm 2\rangle,  \pm 6\rangle$                |
| 100  | $ \pm 3\rangle,  \pm 1\rangle,  \pm 5\rangle$ |
| 100  | $ \pm 3\rangle,  \pm 1\rangle,  \pm 5\rangle$ |
| 162  | $ \pm 4\rangle$                               |
| 168  | $ \pm 4\rangle,  0\rangle,$                   |
| 197  | $ \pm 5\rangle,  \pm 1\rangle,  \pm 3\rangle$ |
| 197  | $ \pm 5\rangle,  \pm 1\rangle,  \pm 3\rangle$ |

**Table S30.** Composition of wave functions for  $[\text{Tm}(\text{Por})(\text{cyclen})]^+$  as extracted from CASSCF/RASSI/Single\_Aniso calculations with basis set 2.

| $M_J$ | Wave Functions and Energies |                 |                       |                 |                       |                 |
|-------|-----------------------------|-----------------|-----------------------|-----------------|-----------------------|-----------------|
|       | 1                           |                 | 2                     |                 | 3                     |                 |
|       | 0.00 cm <sup>-1</sup>       |                 | 3.31 cm <sup>-1</sup> |                 | 30.8 cm <sup>-1</sup> |                 |
|       | c                           | c               | c                     | c               | c                     | c               |
| -6    | -0.251907+0.600185i         | <b>0.650906</b> | -0.269315+0.641441i   | <b>0.695685</b> | -0.000037+0.000037i   | 0.000052        |
| -5    | -0.000003-0.000009i         | 0.000009        | -0.000003-0.00001i    | 0.000010        | 0.010692-0.071001i    | 0.071802        |
| -4    | 0.000013+0.000038i          | 0.000040        | 0.000015+0.00005i     | 0.000052        | -0.000059-0.000105i   | 0.000120        |
| -3    | 0.000011+0.000009i          | 0.000014        | 0.000008+0.000005i    | 0.000009        | 0.189816+0.116022i    | 0.222466        |
| -2    | 0.276161+0.007517i          | 0.276263        | 0.126536+0.003352i    | 0.126580        | -0.000111-0.000059i   | <b>0.000126</b> |
| -1    | 0.000005-0.000005i          | 0.000007        | 0.000006-0.000005i    | 0.000008        | -0.667069+0.019283i   | 0.667348        |
| 0     | -0.000063+0.000042i         | 0.000076        | 0.000013+0.000019i    | 0.000023        | -0.000828+0.00034i    | 0.000895        |
| 1     | -0.000006+0.000002i         | 0.000006        | 0.000007-0.000003i    | 0.000008        | 0.487915-0.455293i    | 0.667348        |
| 2     | 0.099945-0.257551i          | 0.276263        | -0.045894+0.117967i   | 0.126580        | -0.000037+0.00012i    | <b>0.000126</b> |
| 3     | 0.000004+0.000013i          | 0.000014        | -0.000002-0.000009i   | 0.000009        | -0.053407+0.215961i   | 0.222467        |
| 4     | -0.00003-0.000027i          | 0.000040        | 0.00004+0.000033i     | 0.000052        | 0.000032+0.000116i    | 0.000120        |
| 5     | -0.000007-0.000006i         | 0.000009        | 0.000008+0.000006i    | 0.000010        | -0.057523-0.042972i   | 0.071802        |
| 6     | -0.650906                   | <b>0.650906</b> | 0.695685              | <b>0.695685</b> | -0.000052             | 0.000052        |

| $M_J$ | 4                     |                 | 5                     |                 | 6                     |                 |
|-------|-----------------------|-----------------|-----------------------|-----------------|-----------------------|-----------------|
|       | 30.8 cm <sup>-1</sup> |                 | 31.7 cm <sup>-1</sup> |                 | 37.2 cm <sup>-1</sup> |                 |
|       | c                     | c               | c                     | c               | c                     | c               |
| -6    | -0.000021             | 0.000021        | 0.000231-0.000432i    | 0.000490        | 0.107274-0.254585i    | 0.276263        |
| -5    | 0.037086-0.061512i    | 0.071827        | -0.000003+0.000063i   | 0.000063        | -0.000002-0.000009i   | 0.000009        |
| -4    | -0.000009-0.000008i   | 0.000012        | -0.083509-0.118755i   | 0.145177        | 0.00016+0.000182i     | 0.000242        |
| -3    | -0.130895-0.179925i   | 0.222501        | -0.000204-0.000056i   | 0.000212        | 0.000072+0.000065i    | 0.000097        |
| -2    | -0.000026-0.000048i   | 0.000055        | 0.001036+0.00009i     | 0.001040        | 0.650639+0.018625i    | 0.650906        |
| -1    | -0.623529-0.237794i   | <b>0.667334</b> | 0.000603-0.000066i    | <b>0.000607</b> | -0.000103+0.00004i    | 0.000110        |
| 0     | 0.000069i             | 0.000069        | -0.839434+0.503184i   | 0.978695        | 0.001323-0.000878i    | <b>0.001588</b> |
| 1     | -0.625122+0.233574i   | <b>0.667334</b> | -0.000342+0.000501i   | <b>0.000607</b> | 0.000077-0.00008i     | 0.000111        |
| 2     | 0.000026-0.000048i    | 0.000055        | 0.000409-0.000956i    | 0.001040        | 0.235482-0.606816i    | 0.650905        |
| 3     | -0.132108+0.179036i   | 0.222500        | 0.000047-0.000206i    | 0.000211        | 0.000032+0.000091i    | 0.000096        |
| 4     | 0.000009-0.000008i    | 0.000012        | 0.065377+0.129624i    | 0.145178        | -0.000105-0.000218i   | 0.000242        |
| 5     | 0.036669+0.061761i    | 0.071826        | 0.000057+0.000026i    | 0.000063        | -0.000007-0.000005i   | 0.000009        |
| 6     | 0.000021              | 0.000021        | 0.00049               | 0.000490        | 0.276263              | 0.276263        |

| $M_J$ | 7                     |   | 8                    |   | 9                    |   |
|-------|-----------------------|---|----------------------|---|----------------------|---|
|       | 77.1 cm <sup>-1</sup> |   | 100 cm <sup>-1</sup> |   | 100 cm <sup>-1</sup> |   |
|       | c                     | c | c                    | c | c                    | c |

|    |                     |                 |                     |                 |                     |                 |
|----|---------------------|-----------------|---------------------|-----------------|---------------------|-----------------|
| -6 | 0.049336-0.116569i  | 0.126580        | -0.000011-0.000004i | 0.000012        | 0.000006+0.000012i  | 0.000013        |
| -5 | -0.000009-0.000011i | 0.000014        | -0.032176-0.022129i | 0.039051        | -0.021468-0.032468i | 0.038924        |
| -4 | 0.000034+0.00001i   | 0.000035        | -0.000055-0.000032i | 0.000064        | 0.000048+0.000051i  | 0.000070        |
| -3 | 0.000062+0.000071i  | 0.000094        | -0.620623+0.255193i | <b>0.671041</b> | 0.671016-0.004826i  | <b>0.671033</b> |
| -2 | 0.695385+0.020414i  | <b>0.695685</b> | 0.000002-0.000073i  | 0.000073        | -0.000089+0.000066i | 0.000111        |
| -1 | -0.000067+0.000067i | 0.000095        | -0.09209+0.199244i  | 0.219497        | -0.159902+0.150435i | 0.219543        |
| 0  | -0.00001-0.000014i  | 0.000017        | 0.000004-0.000026i  | 0.000026        | -0.000022-0.000013i | 0.000026        |
| 1  | -0.000088+0.000036i | 0.000095        | -0.026038-0.217947i | 0.219497        | -0.057285+0.211938i | 0.219543        |
| 2  | -0.252235+0.648348i | <b>0.695685</b> | 0.000002-0.00007i   | 0.000073        | 0.000016-0.000109i  | 0.000110        |
| 3  | -0.000041-0.000084i | 0.000093        | -0.511437-0.434428i | <b>0.671041</b> | -0.312086-0.594044i | <b>0.671033</b> |
| 4  | -0.000004+0.000035i | 0.000035        | 0.000062-0.000014i  | 0.000064        | 0.000067+0.000019i  | 0.000070        |
| 5  | 0.000007+0.000012i  | 0.000014        | -0.037438+0.011107i | 0.039051        | 0.038754+0.003626i  | 0.038923        |
| 6  | -0.12658            | 0.126580        | 0.000012            | 0.000012        | 0.000014            | 0.000014        |

| $M_J$ | 10                   |                 | 11                   |                 | 12                   |                 |
|-------|----------------------|-----------------|----------------------|-----------------|----------------------|-----------------|
|       | 162 cm <sup>-1</sup> |                 | 168 cm <sup>-1</sup> |                 | 197 cm <sup>-1</sup> |                 |
|       | c                    | c               | c                    | c               | c                    | c               |
| -6    | -0.00002-0.000042i   | 0.000047        | 0.000019+0.000041i   | 0.000045        | 0.000002-0.00001i    | 0.000010        |
| -5    | 0.000015+0.0001i     | 0.000101        | -0.000016-0.000104i  | 0.000105        | -0.292427-0.638602i  | <b>0.702372</b> |
| -4    | 0.626591+0.32769i    | <b>0.707105</b> | -0.613939-0.319384i  | <b>0.692046</b> | 0.0001+0.000017i     | 0.000101        |
| -3    | -0.000063+0.000027i  | 0.000069        | 0.000063-0.000027i   | 0.000069        | -0.012249-0.007631i  | 0.014432        |
| -2    | -0.000037+0.000006i  | 0.000037        | 0.000028+0.000004i   | 0.000028        | -0.000003-0.000001i  | 0.000003        |
| -1    | 0.000001-0.000003i   | 0.000003        | 0.000021-0.000004i   | 0.000021        | 0.06607-0.04583i     | 0.080409        |
| 0     | 0.002234+0.001424i   | 0.002649        | 0.110049-0.173307i   | 0.205295        | 0.00001+0.000013i    | 0.000016        |
| 1     | 0.000003-0.000002i   | 0.000004        | 0.000005+0.000021i   | 0.000022        | 0.06028-0.053216i    | 0.080409        |
| 2     | -0.000011-0.000036i  | 0.000038        | -0.000016-0.000024i  | 0.000029        | -0.000003i           | 0.000003        |
| 3     | 0.000002+0.000069i   | 0.000069        | 0.000002+0.000068i   | 0.000068        | 0.004486+0.013716i   | 0.014431        |
| 4     | 0.561686+0.42954i    | <b>0.707104</b> | 0.550166+0.419815i   | <b>0.692046</b> | -0.000008+0.000101i  | 0.000101        |
| 5     | -0.000097+0.000028i  | 0.000101        | -0.000101+0.00003i   | 0.000105        | 0.550308+0.436449i   | <b>0.702372</b> |
| 6     | -0.000046            | 0.000046        | -0.000045            | 0.000045        | -0.00001             | 0.000010        |

| $M_J$ | 13                   |                 |
|-------|----------------------|-----------------|
|       | 197 cm <sup>-1</sup> |                 |
|       | c                    | c               |
| -6    | -0.000003+0.00001i   | 0.000010        |
| -5    | 0.2908+0.639339i     | <b>0.702367</b> |
| -4    | -0.000101-0.000025i  | 0.000104        |
| -3    | -0.012355-0.007728i  | 0.014573        |
| -2    | 0.000003+0.000001i   | 0.000003        |
| -1    | -0.066198+0.045672i  | 0.080425        |
| 0     | 0.000018-0.000014i   | 0.000023        |
| 1     | 0.060428-0.053072i   | 0.080425        |
| 2     | -0.000003i           | 0.000003        |
| 3     | -0.004484-0.013865i  | 0.014572        |
| 4     | -0.000001+0.000104i  | 0.000104        |
| 5     | 0.549192+0.437844i   | <b>0.702367</b> |
| 6     | -0.00001             | 0.000010        |

**Table S31.** Ab initio ligand-field parameters  $B_n^m$  (in cm<sup>-1</sup>) of the [Yb(TPP)(cyclen)]<sup>+</sup>

| n | m | Experimental Geometry |                | Symmetrized- $C_4$ Geometry |                |
|---|---|-----------------------|----------------|-----------------------------|----------------|
|   |   | Real part             | Imaginary part | Real part                   | Imaginary part |
| 2 | 0 | <b>32.44</b>          | <b>0.00</b>    | <b>46.11</b>                | <b>0.00</b>    |
|   | 1 | 21.19                 | 21.19          | -0.03                       | -0.03          |



|   |   |               |               |               |               |
|---|---|---------------|---------------|---------------|---------------|
|   | 2 | 10.99         | 1.91          | 0.03          | 0.01          |
| 4 | 0 | <b>-84.24</b> | <b>0.00</b>   | <b>-88.89</b> | <b>0.00</b>   |
|   | 1 | -23.24        | -3.95         | 0.05          | -0.01         |
|   | 2 | -3.85         | -3.85         | -0.01         | -0.01         |
|   | 3 | 2.69          | 0.73          | -0.01         | -0.01         |
|   | 4 | <b>40.73</b>  | <b>-34.38</b> | <b>-43.15</b> | <b>-24.47</b> |
|   | 0 | <b>16.92</b>  | <b>0.00</b>   | <b>18.58</b>  | <b>0.00</b>   |
| 6 | 1 | 7.72          | 0.54          | -0.01         | 0.00          |
|   | 2 | 0.74          | 0.63          | 0.00          | 0.00          |
|   | 3 | 1.96          | 1.96          | 0.00          | 0.00          |
|   | 4 | <b>-2.08</b>  | <b>-4.22</b>  | <b>2.55</b>   | <b>-2.91</b>  |
|   | 5 | -1.98         | -0.94         | 0.00          | 0.00          |
|   | 6 | 0.77          | -0.36         | 0.00          | 0.00          |

**Table S32.** CASSCF/RASSI calculated energies and wave functions of the [Yb(TPP)(cyclen)]<sup>+</sup> with an absolute coefficient larger than 0.05.

| Basis set 2                |                                                                                                         |
|----------------------------|---------------------------------------------------------------------------------------------------------|
| Energy (cm <sup>-1</sup> ) | Wave Function                                                                                           |
| 0.00                       | $-5/2\rangle$ ,   $+3/2\rangle$ ,   $+5/2\rangle$ ,   $-3/2\rangle$ ,   $-7/2\rangle$                   |
| 0.00                       | $+5/2\rangle$ ,   $-3/2\rangle$ ,   $-5/2\rangle$ ,   $+3/2\rangle$ ,   $+7/2\rangle$                   |
| 146.9                      | $+3/2\rangle$ ,   $-3/2\rangle$ ,   $-5/2\rangle$ ,   $+5/2\rangle$ ,   $+7/2\rangle$ ,   $+1/2\rangle$ |
| 146.9                      | $-3/2\rangle$ ,   $+3/2\rangle$ ,   $+5/2\rangle$ ,   $-5/2\rangle$ ,   $-7/2\rangle$ ,   $-1/2\rangle$ |
| 176.5                      | $+1/2\rangle$ ,   $-7/2\rangle$ ,   $-3/2\rangle$ ,   $-1/2\rangle$ ,   $+7/2\rangle$                   |
| 176.5                      | $-1/2\rangle$ ,   $+7/2\rangle$ ,   $+3/2\rangle$ ,   $+1/2\rangle$ ,   $-7/2\rangle$                   |
| 244.2                      | $-7/2\rangle$ ,   $+1/2\rangle$ ,   $-5/2\rangle$ ,   $+3/2\rangle$                                     |
| 244.2                      | $+7/2\rangle$ ,   $-1/2\rangle$ ,   $+5/2\rangle$ ,   $-3/2\rangle$                                     |

**Table S33.** Composition of wave functions for [Yb(TPP)(cyclen)]<sup>+</sup> as extracted from CASSCF/RASSI/Single\_Aniso calculations with basis set 2.

| $M_J$ | Wave Functions and Energies |                 |                       |                 |                        |                 |
|-------|-----------------------------|-----------------|-----------------------|-----------------|------------------------|-----------------|
|       | 1                           |                 | 2                     |                 | 3                      |                 |
|       | 0.00 cm <sup>-1</sup>       |                 | 0.00 cm <sup>-1</sup> |                 | 146.9 cm <sup>-1</sup> |                 |
|       | c                           | c               | c                     | c               | c                      | c               |
| -7/2  | -0.078977-0.055558i         | 0.096561        | 0                     | 0.000000        | 0.003073+0.042351i     | 0.042462        |
| -5/2  | 0.702978+0.627906i          | <b>0.942573</b> | -0.09666-0.068744i    | 0.118612        | -0.047363-0.239204i    | 0.243848        |
| -3/2  | 0.068527+0.077001i          | 0.103078        | 0.220475+0.168959i    | 0.277770        | 0.505816+0.077572i     | 0.511730        |
| -1/2  | -0.013494-0.004644i         | 0.014271        | 0.000625+0.01335i     | 0.013365        | -0.041499-0.00485i     | 0.041781        |
| 1/2   | -0.008192+0.010559i         | 0.013364        | -0.013709-0.003966i   | 0.014271        | -0.064021-0.046816i    | 0.079312        |
| 3/2   | 0.277539-0.011337i          | 0.277770        | -0.100351+0.02355i    | 0.103077        | 0.580203+0.547295i     | <b>0.797601</b> |
| 5/2   | 0.11861-0.00061i            | 0.118612        | 0.936239-0.109091i    | <b>0.942573</b> | -0.083488+0.133779i    | 0.157693        |
| 7/2   | 0                           | 0.000000        | 0.096562              | 0.096562        | -0.088306              | 0.088306        |

| $M_J$ | 4                      |                 | 5                      |                 | 6                      |                 |
|-------|------------------------|-----------------|------------------------|-----------------|------------------------|-----------------|
|       | 146.9 cm <sup>-1</sup> |                 | 176.5 cm <sup>-1</sup> |                 | 176.5 cm <sup>-1</sup> |                 |
|       | c                      | c               | c                      | c               | c                      | c               |
| -7/2  | -0.006391-0.088075i    | 0.088307        | 0.319412+0.296713i     | 0.435962        | -0.039239-0.036451i    | 0.053557        |
| -5/2  | -0.127386+0.092951i    | 0.157693        | 0.014528+0.043169i     | 0.045548        | -0.019293+0.009361i    | 0.021444        |
| -3/2  | 0.587849+0.539074i     | <b>0.797601</b> | 0.091804-0.011813i     | 0.092561        | 0.007196+0.004147i     | 0.008305        |
| -1/2  | 0.051327+0.060465i     | 0.079313        | -0.078512-0.025536i    | 0.082560        | -0.756493-0.465619i    | <b>0.888303</b> |
| 1/2   | -0.00784-0.041039i     | 0.041781        | 0.87115+0.173724i      | <b>0.888303</b> | -0.074902-0.034726i    | 0.082560        |
| 3/2   | -0.113974-0.498876i    | 0.511730        | 0.008095+0.001859i     | 0.008306        | -0.059222-0.071136i    | 0.092561        |

|     |                     |          |                    |          |                    |          |
|-----|---------------------|----------|--------------------|----------|--------------------|----------|
| 5/2 | -0.242004-0.029927i | 0.243847 | 0.007765+0.019989i | 0.021444 | 0.040025-0.021741i | 0.045549 |
| 7/2 | -0.042463           | 0.042463 | -0.053557          | 0.053557 | -0.435961          | 0.435961 |

| $M_J$ | 7                      |                 | 8                      |                 |
|-------|------------------------|-----------------|------------------------|-----------------|
|       | 244.2 cm <sup>-1</sup> |                 | 244.2 cm <sup>-1</sup> |                 |
|       | c                      | c               | c                      | c               |
| -7/2  | -0.744514-0.483545i    | <b>0.887759</b> | 0.004318+0.002805i     | 0.005149        |
| -5/2  | -0.077474-0.067327i    | 0.102641        | -0.008439-0.004279i    | 0.009462        |
| -3/2  | -0.024927-0.024447i    | 0.034914        | 0.063667+0.016589i     | 0.065793        |
| -1/2  | -0.000321+0.015102i    | 0.015105        | -0.377974-0.229327i    | 0.442103        |
| 1/2   | 0.441895+0.013552i     | 0.442103        | 0.007957-0.01284i      | 0.015106        |
| 3/2   | 0.06243+0.020766i      | 0.065793        | 0.034221-0.006926i     | 0.034915        |
| 5/2   | 0.009408+0.001008i     | 0.009462        | -0.101645+0.014265i    | 0.102641        |
| 7/2   | 0.005149               | 0.005149        | 0.88776                | <b>0.887760</b> |

**Table S34.** CASSCF/RASSI calculated energies and wave functions of the [Yb(Por)(cyclen)]<sup>+</sup> with an absolute coefficient larger than 0.05.

| Basis set 2                |                                  |
|----------------------------|----------------------------------|
| Energy (cm <sup>-1</sup> ) | Wave Function                    |
| 0.00                       | -5/2>,   +3/2>,   +5/2>,   -3/2> |
| 0.00                       | +5/2>,   -3/2>,   -5/2>,   +3/2> |
| 143.7                      | -3/2>,   +3/2>,   +5/2>,   -5/2> |
| 143.7                      | +3/2>,   -3/2>,   -5/2>,   +5/2> |
| 176.4                      | -1/2>,   +7/2>                   |
| 176.4                      | +1/2>,   -7/2>                   |
| 252.7                      | -7/2>,   +1/2>                   |
| 252.7                      | +7/2>,   -1/2>                   |

**Table S35.** Composition of wave functions for [Yb(Por)(cyclen)]<sup>+</sup> as extracted from CASSCF/RASSI/Single\_Aniso calculations with basis set 2.

| $M_J$ | Wave Functions and Energies |                 |                       |                 |                        |                 |
|-------|-----------------------------|-----------------|-----------------------|-----------------|------------------------|-----------------|
|       | 1                           |                 | 2                     |                 | 3                      |                 |
|       | 0.00 cm <sup>-1</sup>       |                 | 0.00 cm <sup>-1</sup> |                 | 143.7 cm <sup>-1</sup> |                 |
|       | c                           | c               | c                     | c               | c                      | c               |
| -7/2  | 0                           | 0.000000        | 0.000166+0.000079i    | 0.000184        | 0.00001+0.000023i      | 0.000025        |
| -5/2  | 0.084038-0.012304i          | 0.084934        | 0.946456+0.160992i    | <b>0.960051</b> | -0.17296+0.021727i     | 0.174319        |
| -3/2  | 0.253571-0.078947i          | 0.265577        | -0.023637-0.000267i   | 0.023639        | -0.728966+0.030391i    | <b>0.729599</b> |
| -1/2  | -0.000056+0.000033i         | 0.000065        | -0.000028-0.000024i   | 0.000037        | 0.00022-0.000091i      | 0.000238        |
| 1/2   | 0.000036-0.000009i          | 0.000037        | -0.000036-0.000053i   | 0.000064        | -0.000044+0.000033i    | 0.000055        |
| 3/2   | -0.021455-0.009922i         | 0.023638        | -0.194987-0.180308i   | 0.265577        | -0.566339-0.275418i    | 0.629758        |
| 5/2   | -0.923717-0.261616i         | <b>0.960050</b> | 0.070582+0.047243i    | 0.084934        | -0.173422-0.103089i    | 0.201749        |
| 7/2   | 0.000184                    | 0.000184        | 0                     | 0.000000        | 0.000119               | 0.000119        |

| $M_J$ | 4                      |          | 5                      |          | 6                      |          |
|-------|------------------------|----------|------------------------|----------|------------------------|----------|
|       | 143.7 cm <sup>-1</sup> |          | 176.4 cm <sup>-1</sup> |          | 176.4 cm <sup>-1</sup> |          |
|       | c                      | c        | c                      | c        | c                      | c        |
| -7/2  | 0.000048+0.000109i     | 0.000119 | 0                      | 0.000000 | 0.351291+0.126352i     | 0.373323 |
| -5/2  | 0.164052+0.117429i     | 0.201749 | 0.00006-0.000021i      | 0.000064 | -0.000083+0.000002i    | 0.000083 |

|      |                     |                 |                     |                 |                     |                 |
|------|---------------------|-----------------|---------------------|-----------------|---------------------|-----------------|
| -3/2 | -0.479656-0.408075i | 0.629758        | 0.000169-0.00004i   | 0.000174        | -0.000088+0.000049i | 0.000101        |
| -1/2 | -0.000013+0.000054i | 0.000056        | 0.858477-0.351634i  | <b>0.927701</b> | -0.000115-0.000183i | 0.000216        |
| 1/2  | 0.000005+0.000238i  | 0.000238        | -0.000171+0.000134i | 0.000217        | -0.688802-0.621434i | <b>0.927701</b> |
| 3/2  | 0.264891+0.679815i  | <b>0.729600</b> | 0.000066+0.000076i  | 0.000101        | 0.000145+0.000095i  | 0.000173        |
| 5/2  | -0.049555-0.167127i | 0.174319        | -0.000077-0.00003i  | 0.000083        | -0.000049-0.00004i  | 0.000063        |
| 7/2  | -0.000025           | 0.000025        | -0.373323           | 0.373323        | 0                   | 0.000000        |

| $M_J$ | 7                      |                 | 8                      |                 |
|-------|------------------------|-----------------|------------------------|-----------------|
|       | 252.7 cm <sup>-1</sup> |                 | 252.7 cm <sup>-1</sup> |                 |
|       | c                      | c               | c                      | c               |
| -7/2  | 0                      | 0.000000        | -0.704799-0.603231i    | <b>0.927701</b> |
| -5/2  | 0.000034-0.000006i     | 0.000035        | 0.000163+0.000076i     | 0.000180        |
| -3/2  | 0.000098-0.000015i     | 0.000099        | -0.00014-0.000007i     | 0.000140        |
| -1/2  | 0.345466-0.141504i     | 0.373323        | -0.000017-0.000085i    | 0.000087        |
| 1/2   | -0.000069+0.000054i    | 0.000088        | -0.170448-0.332141i    | 0.373323        |
| 3/2   | 0.00011+0.000086i      | 0.000140        | 0.000064+0.000075i     | 0.000099        |
| 5/2   | 0.000173+0.000049i     | 0.000180        | -0.000022-0.000026i    | 0.000034        |
| 7/2   | 0.927701               | <b>0.927701</b> | 0                      | 0.000000        |
